# Supplementary material for: Structural dynamism of chiral sodium peraza-macrocycle complexes derived from cyclic peptoids
Source: Royal Society of Chemistry journal article supplement (doi:10.1039/d1ob00733e), 2021-01-01
Supplement: d1ob00733e1.pdf [file d1ob00733e1.pdf]

## *Supporting Information*

*For*

# **Structural dynamism of chiral sodium peraza- macrocycles complexes derived from cyclic peptoids**

Rosaria Schettini,<sup>‡a</sup> Assunta D'Amato,<sup>‡a</sup> Alicja Malgorzata Araszczuk,<sup>a</sup>  
Giorgio Della Sala,<sup>a</sup> Chiara Costabile,<sup>a</sup> Anna Maria D'Ursi,<sup>b</sup> Manuela Grimaldi,<sup>b</sup>  
Irene Izzo<sup>\*a</sup> and Francesco De Riccardis<sup>\*a</sup>

<sup>a</sup>*Department of Chemistry and Biology "A. Zambelli", University of Salerno, Via Giovanni Paolo II, 132, Fisciano (SA), 84084, Italy. Email: FDR: dericca@unisa.it; II: izzo@unisa.it*

<sup>b</sup>*Department of Pharmacy, University of Salerno, Via Giovanni Paolo II, 132, Fisciano (SA), 84084, Italy.*

<sup>‡</sup>*Equal contribution*

## Table of Contents

|                                                                             |     |
|-----------------------------------------------------------------------------|-----|
| List of abbreviations .....                                                 | S3  |
| 1.0 $^1\text{H}$ -, $^{13}\text{C}$ NMR and two-dimensional spectra.....    | S4  |
| 1.1 1D and 2D spectra of cyclic derivatives and their metal complexes ..... | S4  |
| Figure S1 .....                                                             | S27 |
| 2.2 $^1\text{H}$ NMR titrations with NaTFPB (Figures S2-S8) .....           | S45 |
| Figure S9 .....                                                             | S48 |
| 2.0 HPLC Chromatograms (Figures S10-11) .....                               | S49 |
| 3.0 UV-Vis Spectra (Figures S12-S18).....                                   | S50 |
| 4.0 CD Spectra (Figures S19-S25) .....                                      | S57 |
| 5.0 Computational Details .....                                             | S64 |
| 5.1 Cartesian Coordinates and energies of calculated structures .....       | S65 |

## List of abbreviations

**DCM:** dichloromethane

**DIC:** *N,N'*-diisopropylcarbodiimide

**DIPEA:** *N,N*-diisopropylethylamine

**DMF:** *N,N*-dimethylformamide

**HFIP:** 1,1,1,3,3,3-hexafluoro-2-propanol

**HATU:** *O*-(7-azabenzotriazol-1-yl)-*N,N,N',N'*-tetramethyluronium hexafluorophosphate

**RP-HPLC:** reversed-phase high-performance liquid chromatography

**TFA:** trifluoroacetic acid

**TFE:** 2,2,2-trifluoroethanol

**TFPB:** tetrakis[3,5-bis(trifluoromethyl)phenyl]borate

## 1.0 $^1\text{H}$ -, $^{13}\text{C}$ NMR and two-dimensional spectra

### 1.1 1D and 2D spectra of cyclic derivatives and their metal complexes

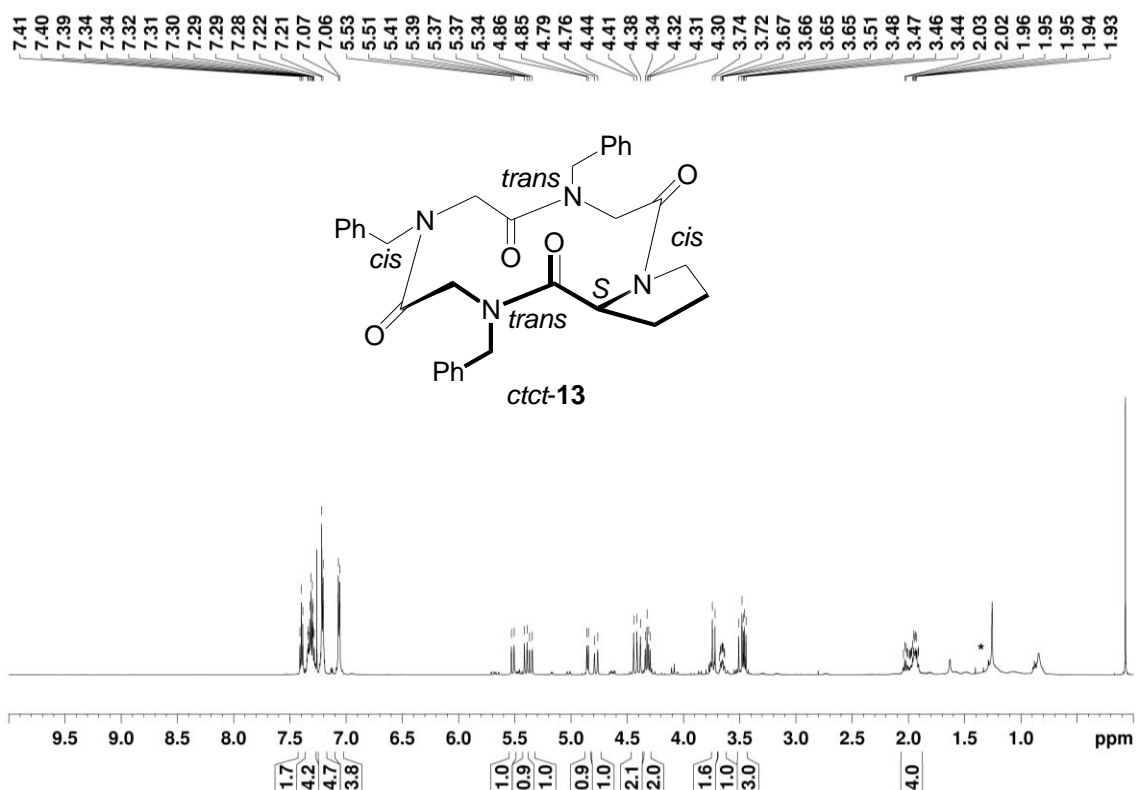

**13:**  $^1\text{H}$  NMR (600 MHz,  $\text{CDCl}_3$ ). Grease impurity labelled with an asterisk.

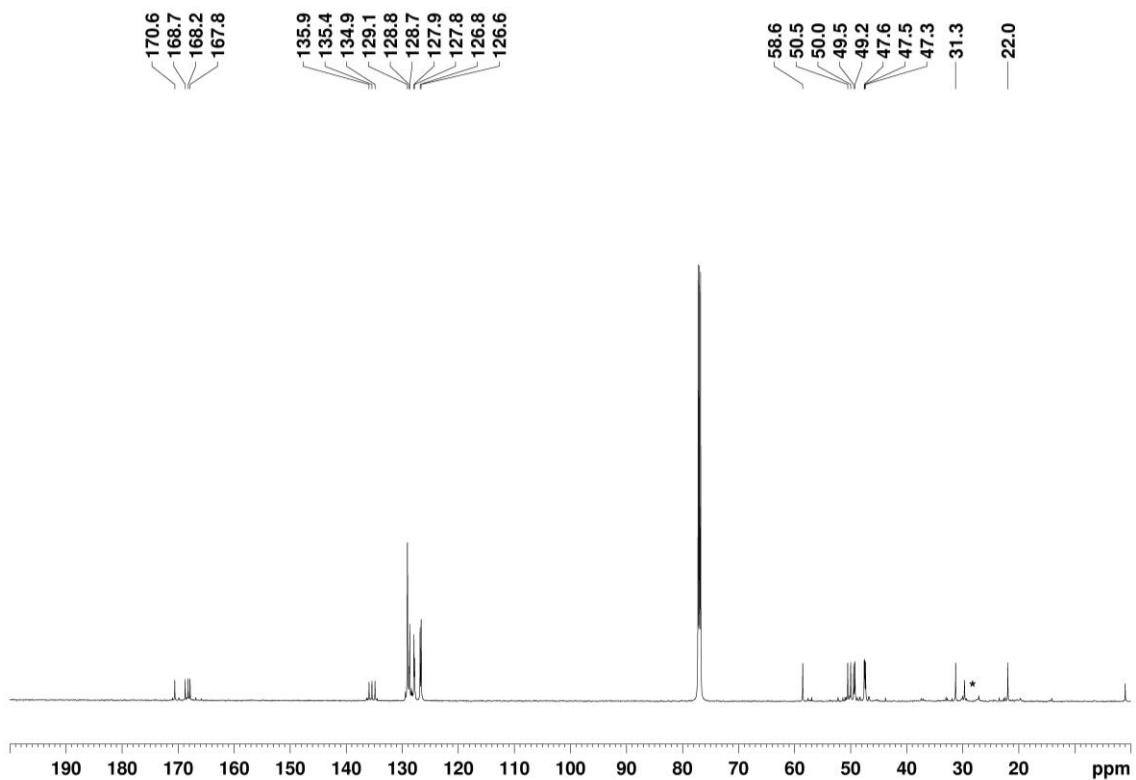

**13:**  $^{13}\text{C}$  NMR (150 MHz,  $\text{CDCl}_3$ ). Grease impurity labelled with an asterisk.

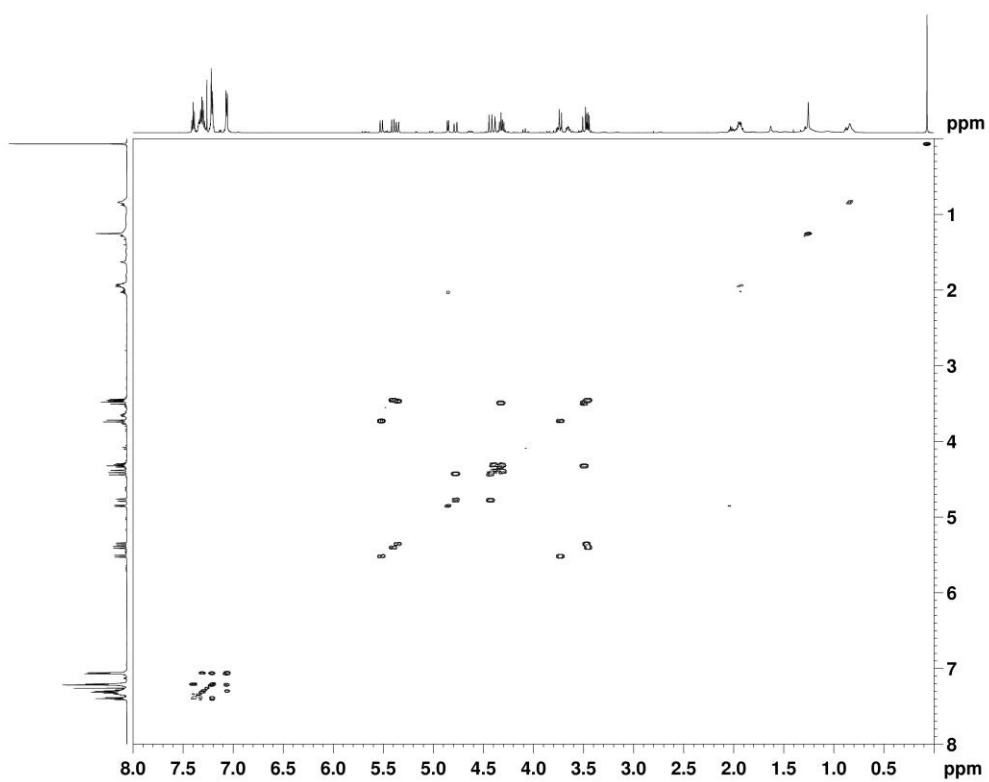

13: COSY NMR (600 MHz, CDCl<sub>3</sub>)

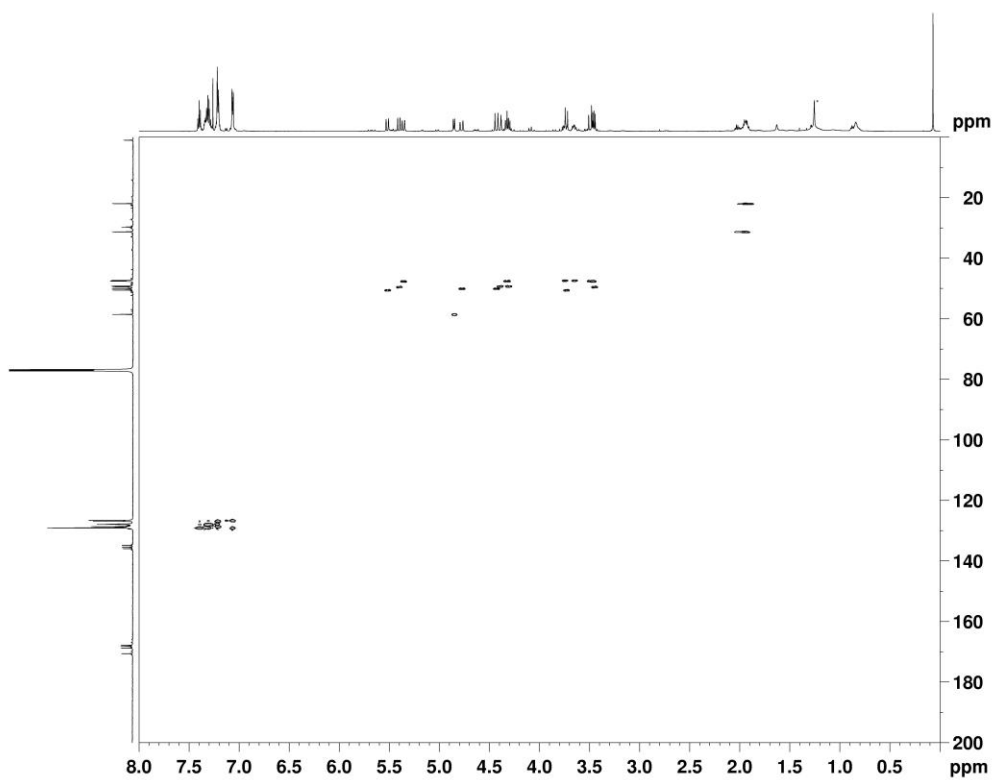

**13:** HSQC NMR (600 MHz, CDCl<sub>3</sub>). Grease impurity labelled with an asterisk.

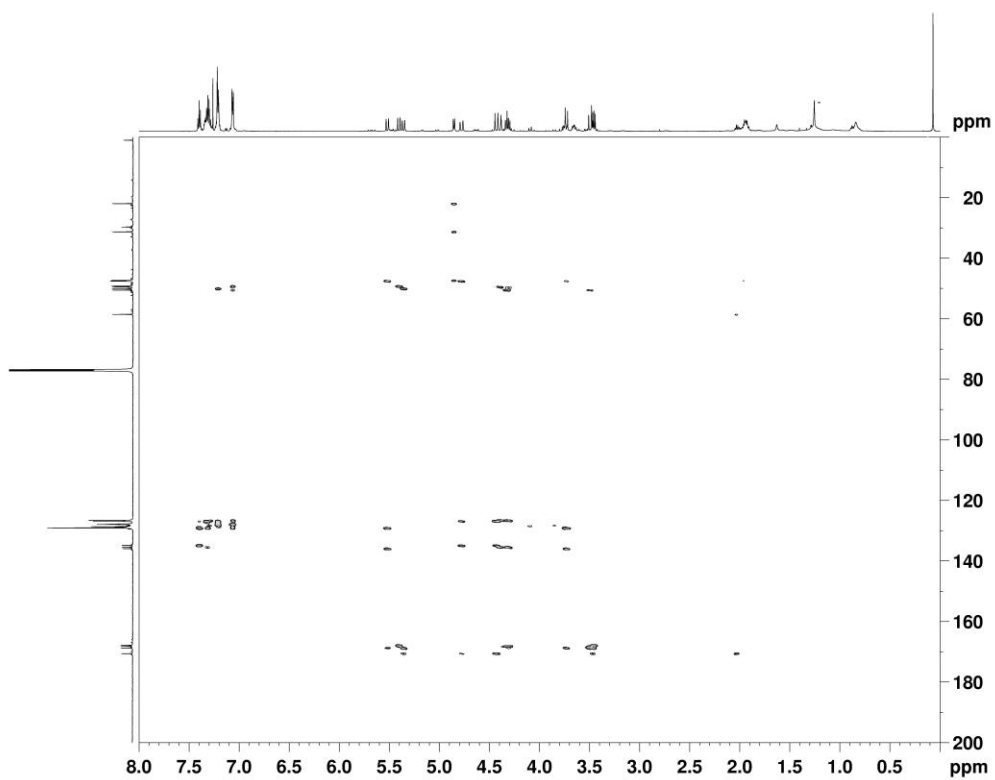

**13:** HMBC NMR (600 MHz,  $\text{CDCl}_3$ ). Grease impurity labelled with an asterisk.

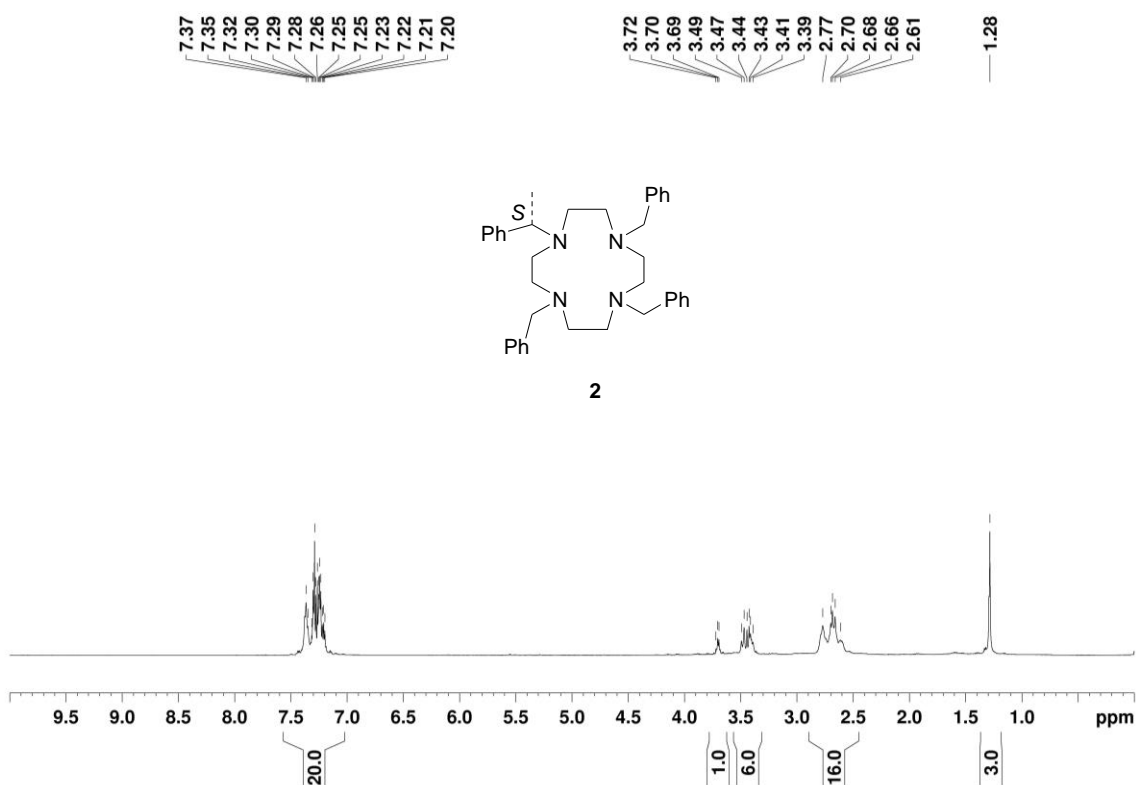

2:  $^1\text{H}$  NMR (600 MHz,  $\text{CDCl}_3$ ). Grease at 1.29 overlap with the doublet at 1.28 ppm.

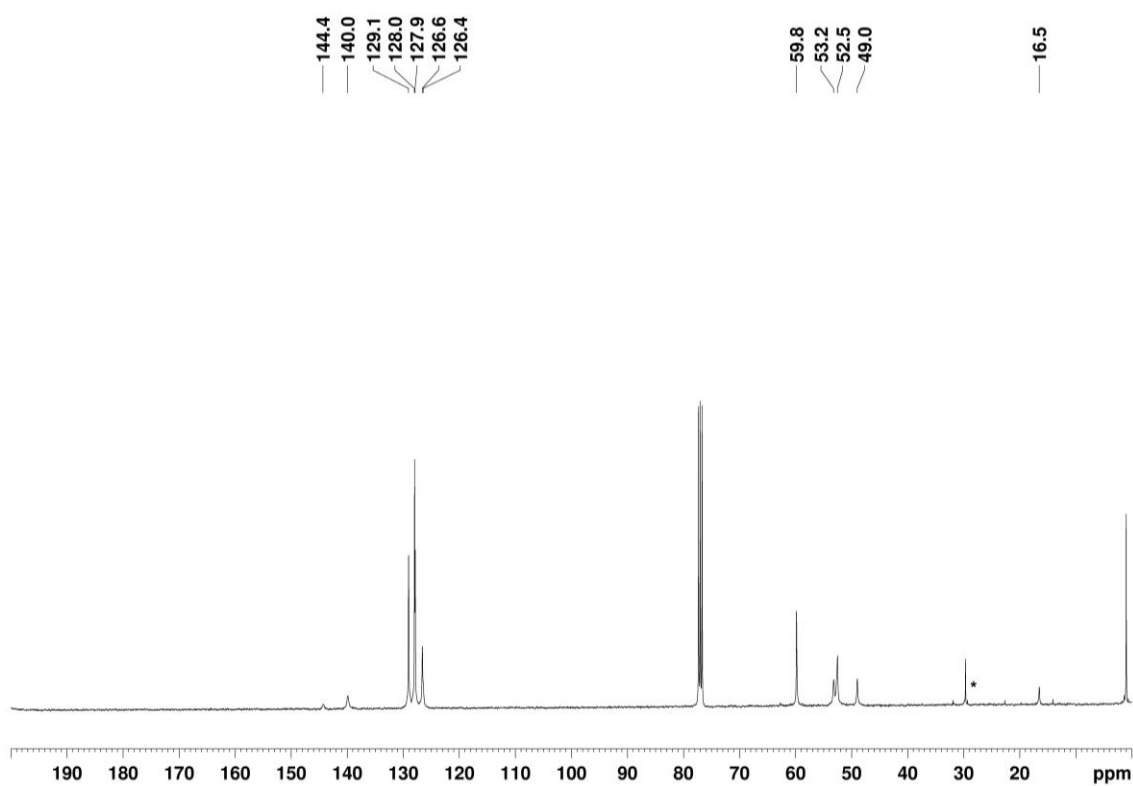

2:  $^{13}\text{C}$  NMR (100 MHz,  $\text{CDCl}_3$ ). Grease impurity labelled with an asterisk.



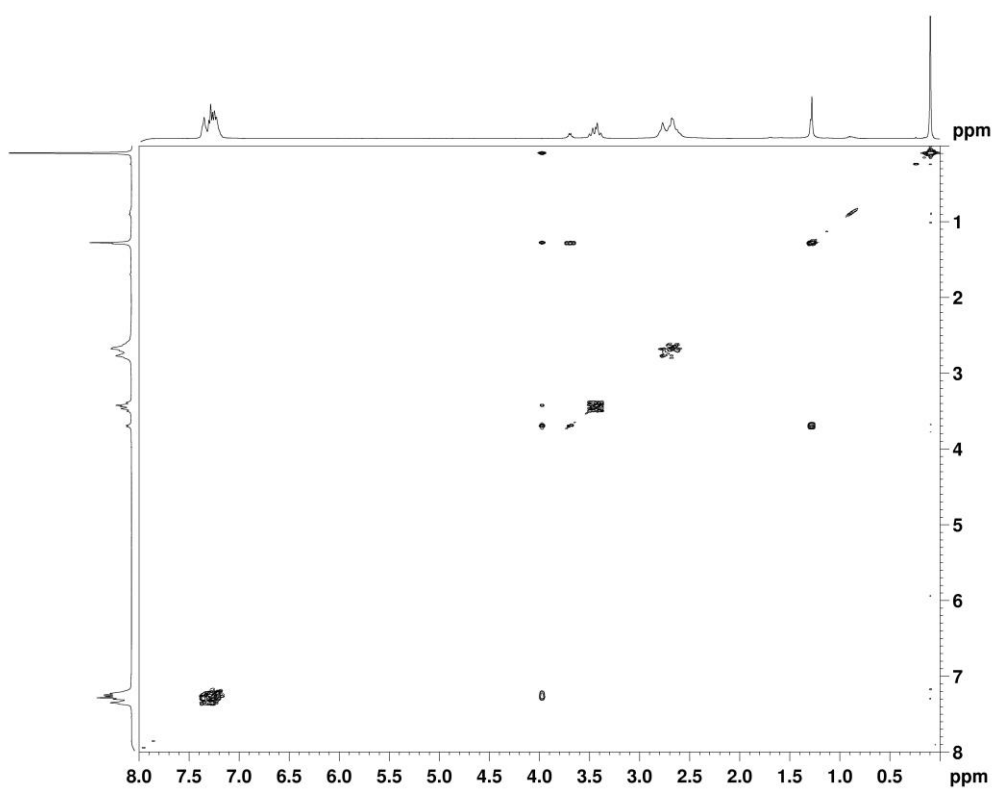

2: COSY NMR (400 MHz, CDCl<sub>3</sub>)

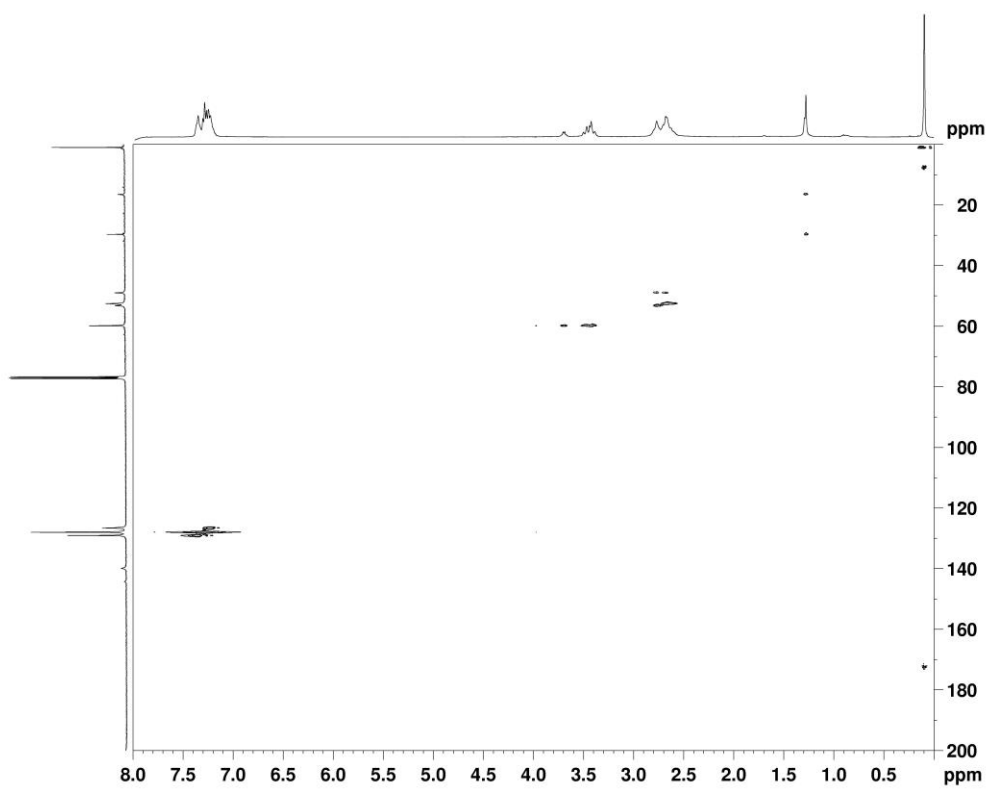

2: HSQC NMR (400 MHz,  $\text{CDCl}_3$ )

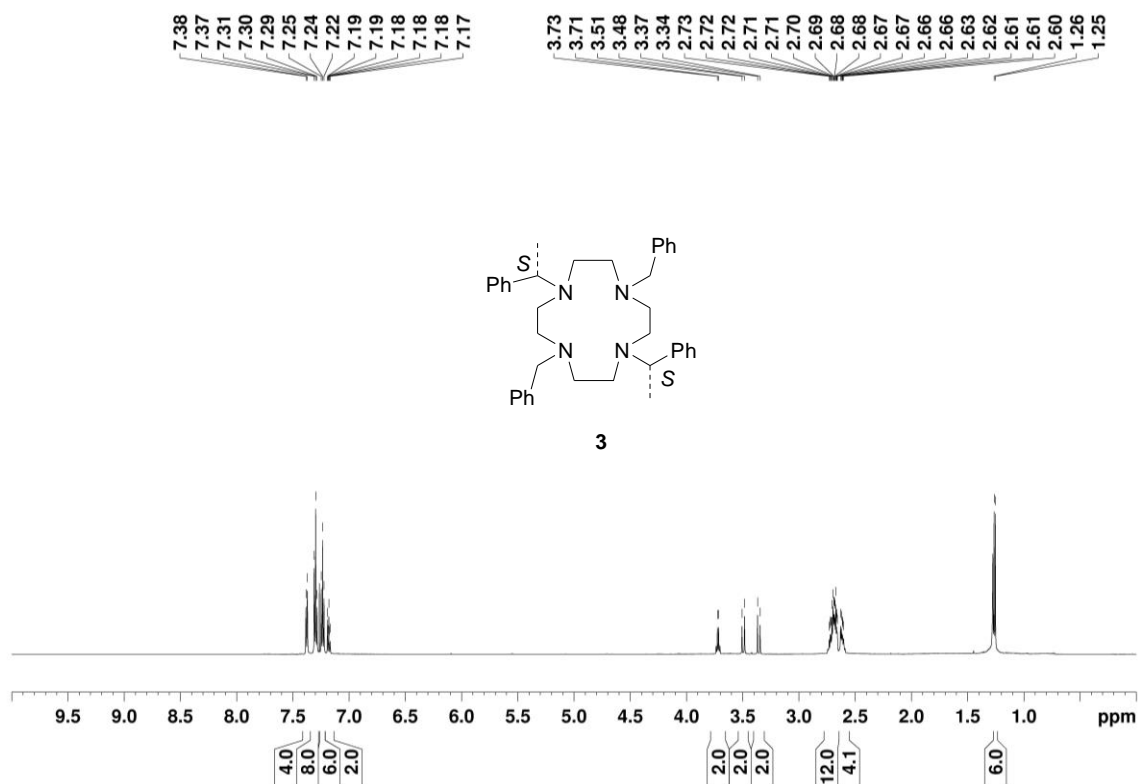

**3**:  $^1\text{H}$  NMR (600 MHz,  $\text{CDCl}_3$ )

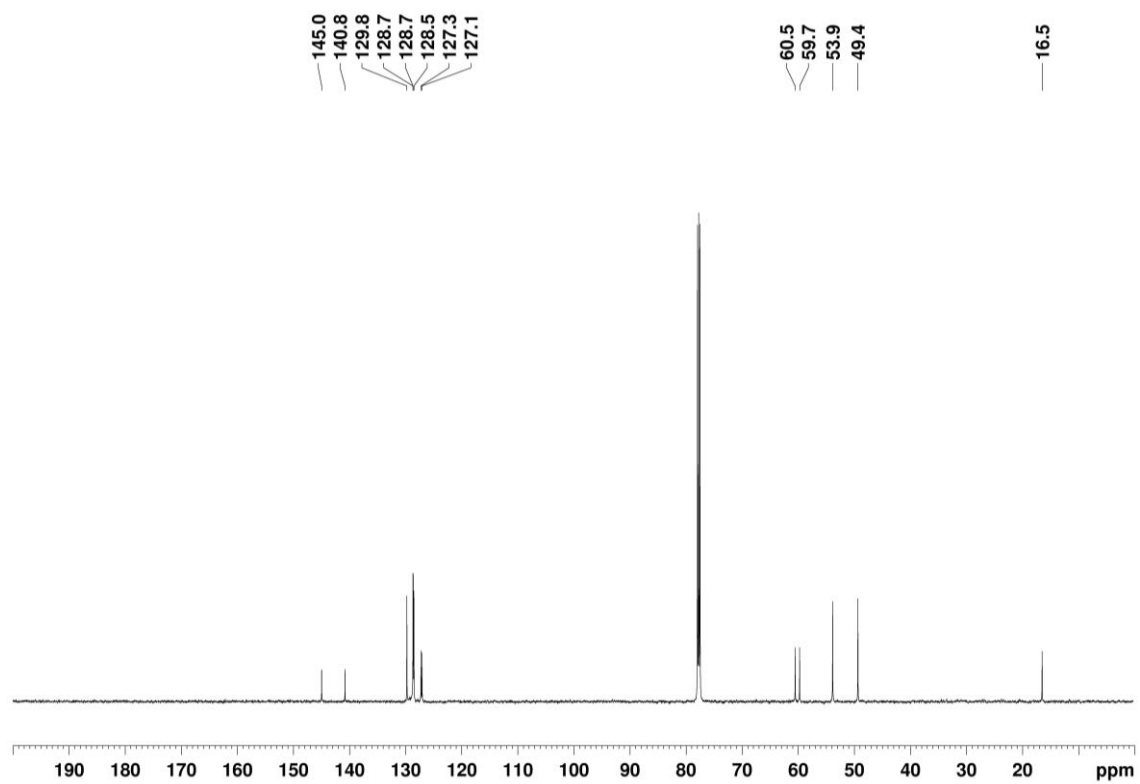

**3**:  $^{13}\text{C}$  NMR (150 MHz,  $\text{CDCl}_3$ ). Grease impurity labelled with an asterisk.

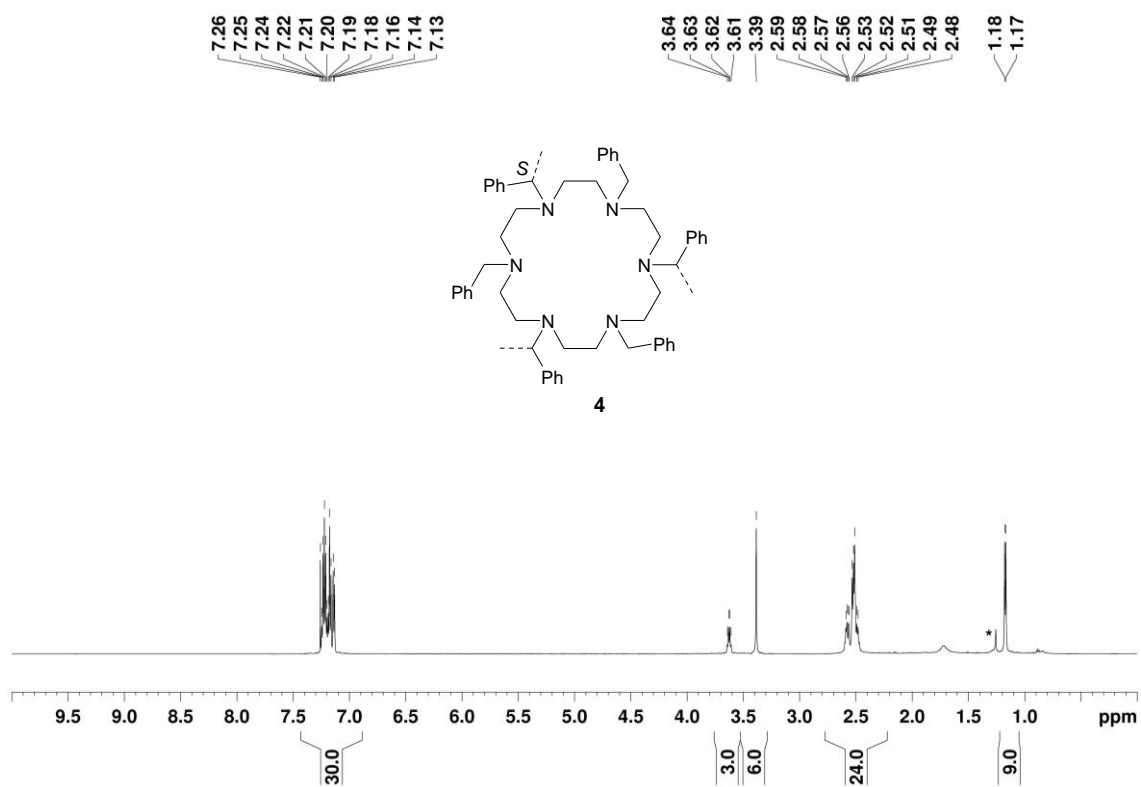

**4**: <sup>1</sup>H NMR (600 MHz, CDCl<sub>3</sub>). Grease impurity labelled with an asterisk.

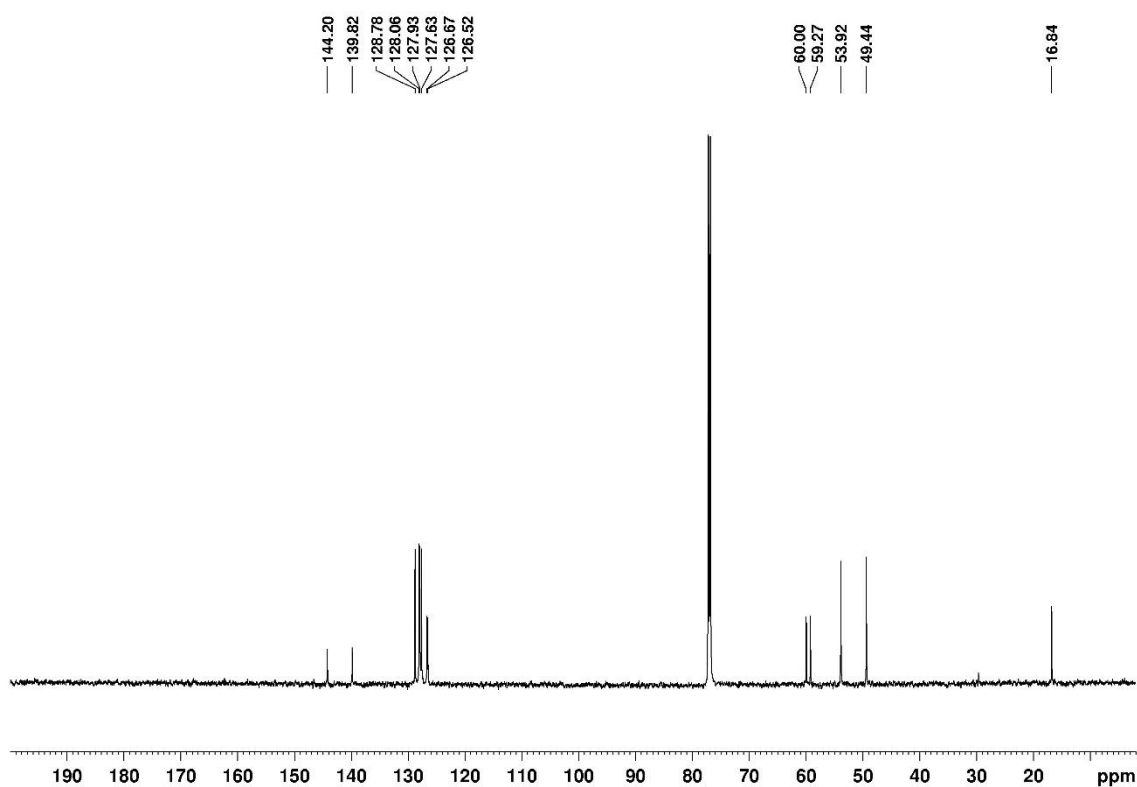

**4**: <sup>13</sup>C NMR (150 MHz, CDCl<sub>3</sub>)

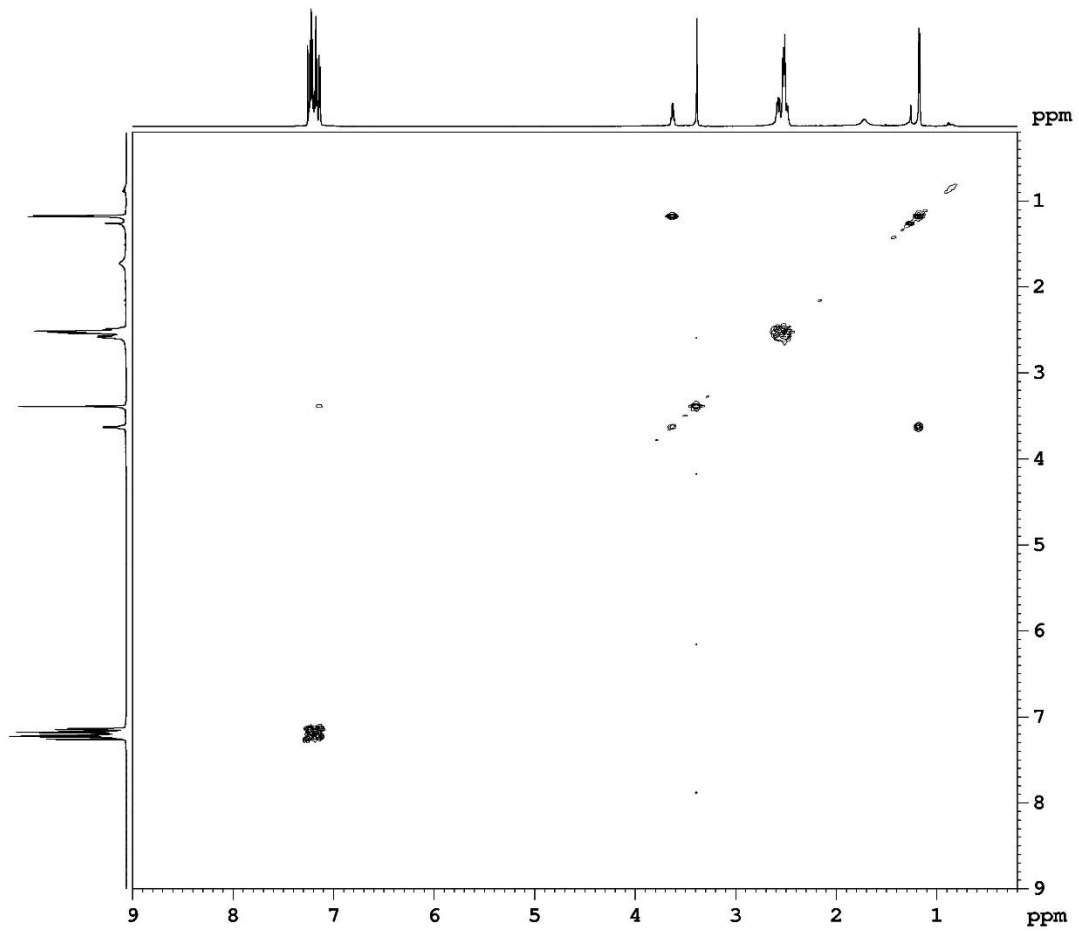

4: COSY NMR (600 MHz, CDCl<sub>3</sub>)

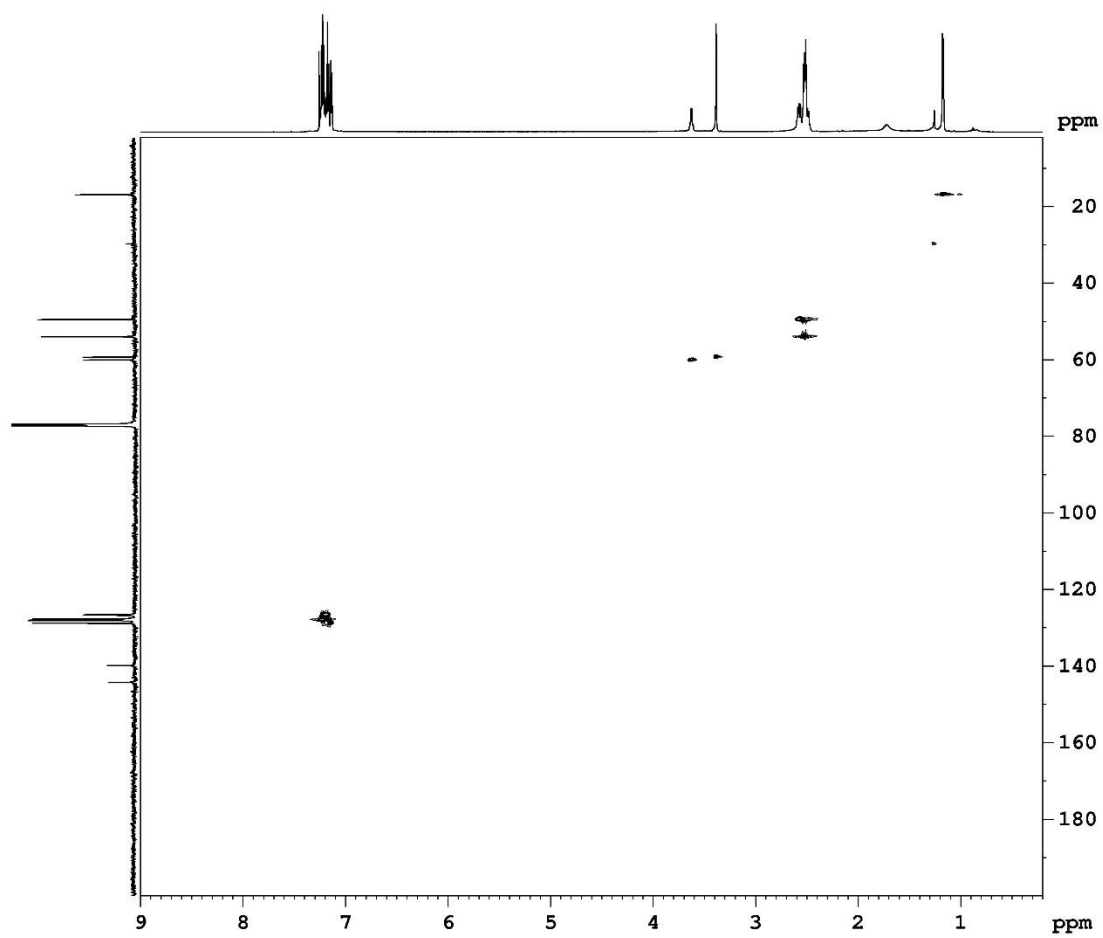

4: HSQC NMR (600 MHz,  $\text{CDCl}_3$ )

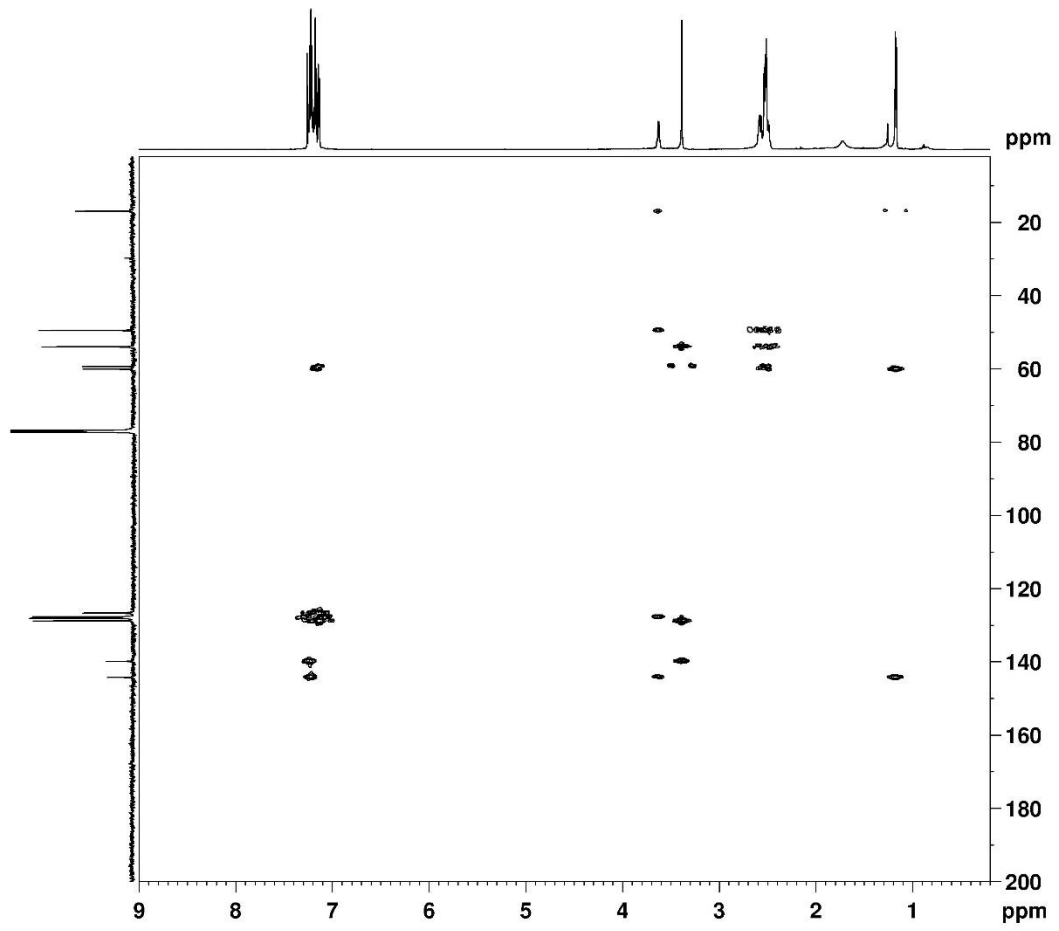

4: HMBC NMR (600 MHz, CDCl<sub>3</sub>)

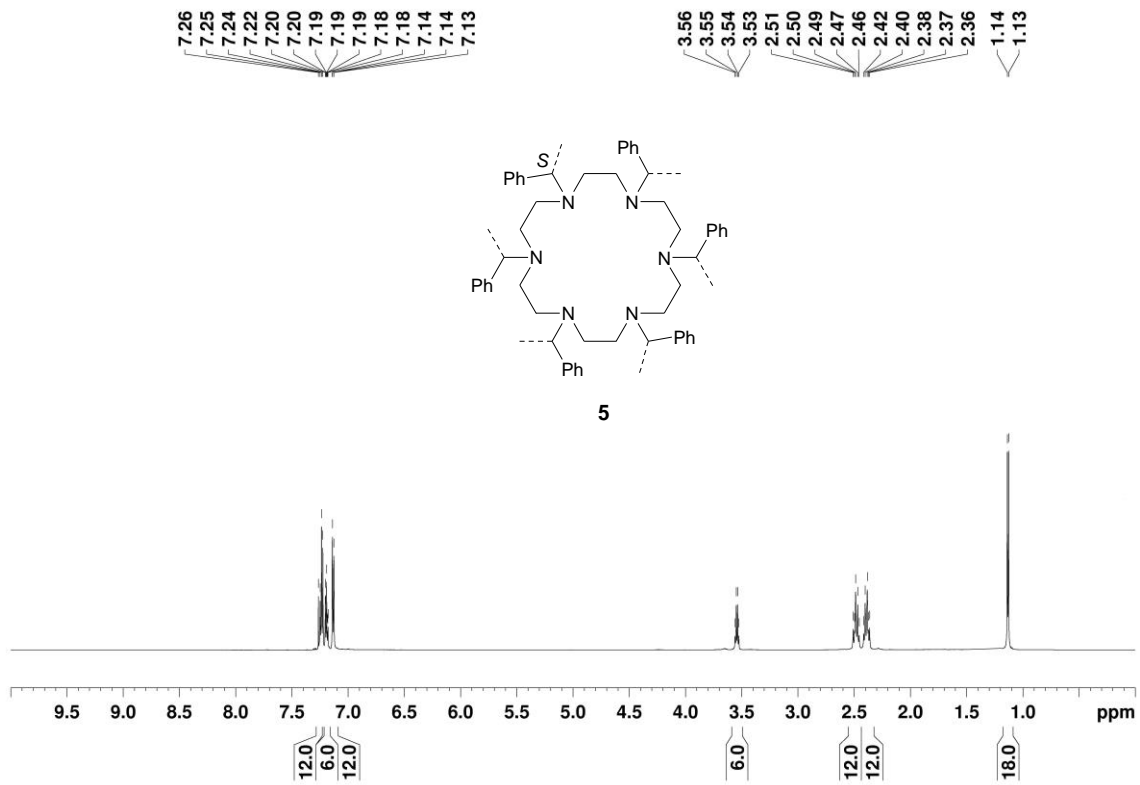

5:  $^1\text{H}$  NMR (600 MHz,  $\text{CDCl}_3$ )

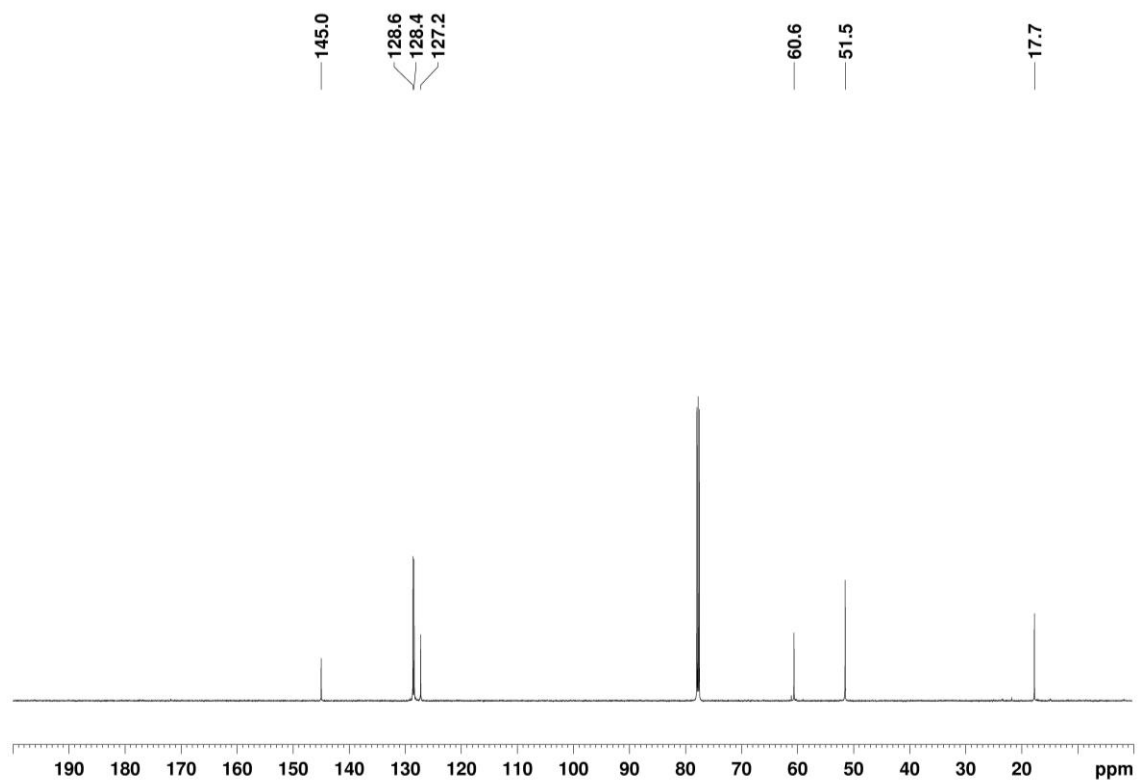

5:  $^{13}\text{C}$  NMR (150 MHz,  $\text{CDCl}_3$ )



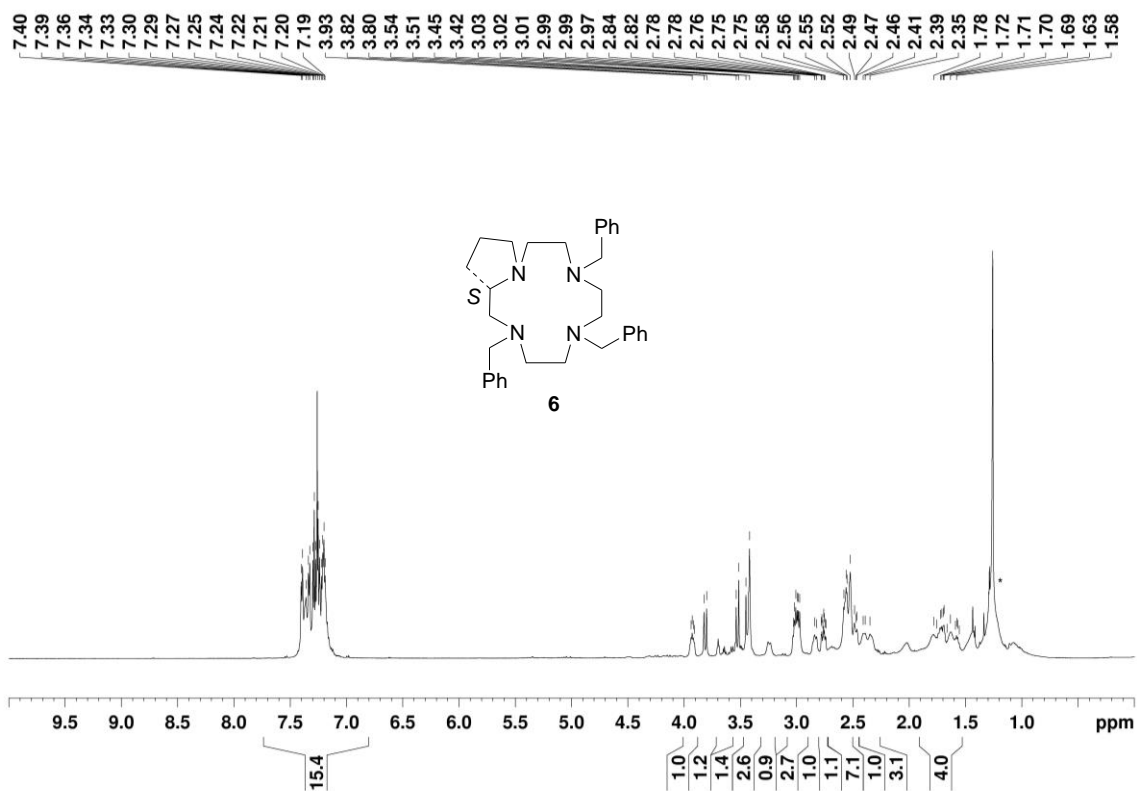

**6**:  $^1\text{H}$  NMR (600 MHz,  $\text{CDCl}_3$ ). Grease impurity labelled with an asterisk.

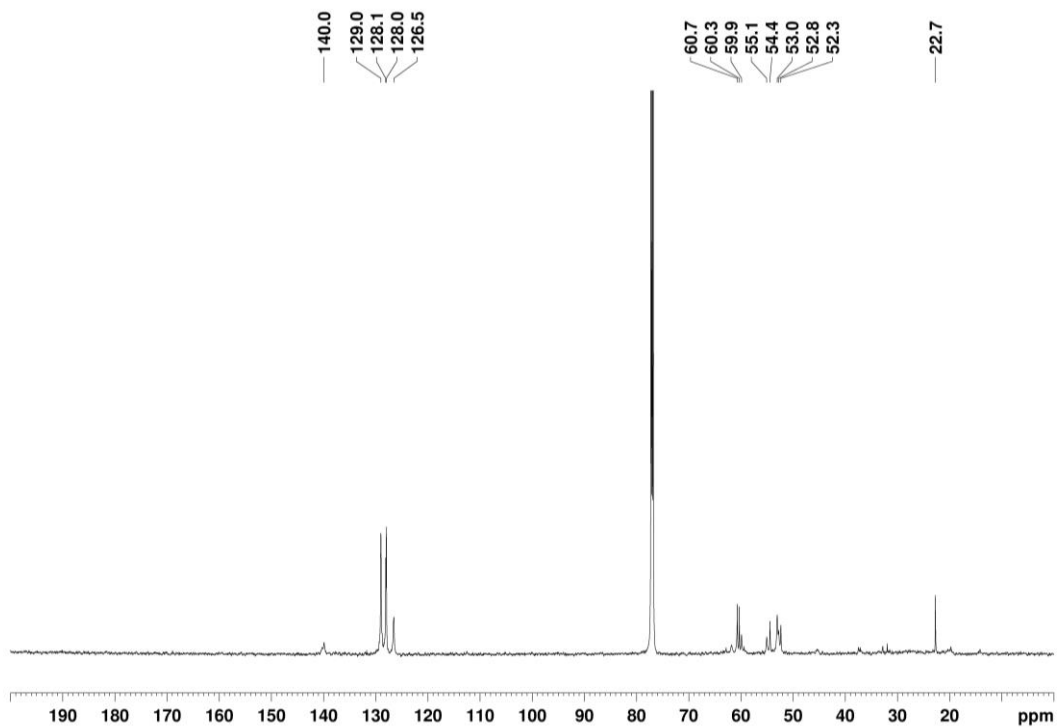

**6**:  $^{13}\text{C}$  NMR (150 MHz,  $\text{CDCl}_3$ )

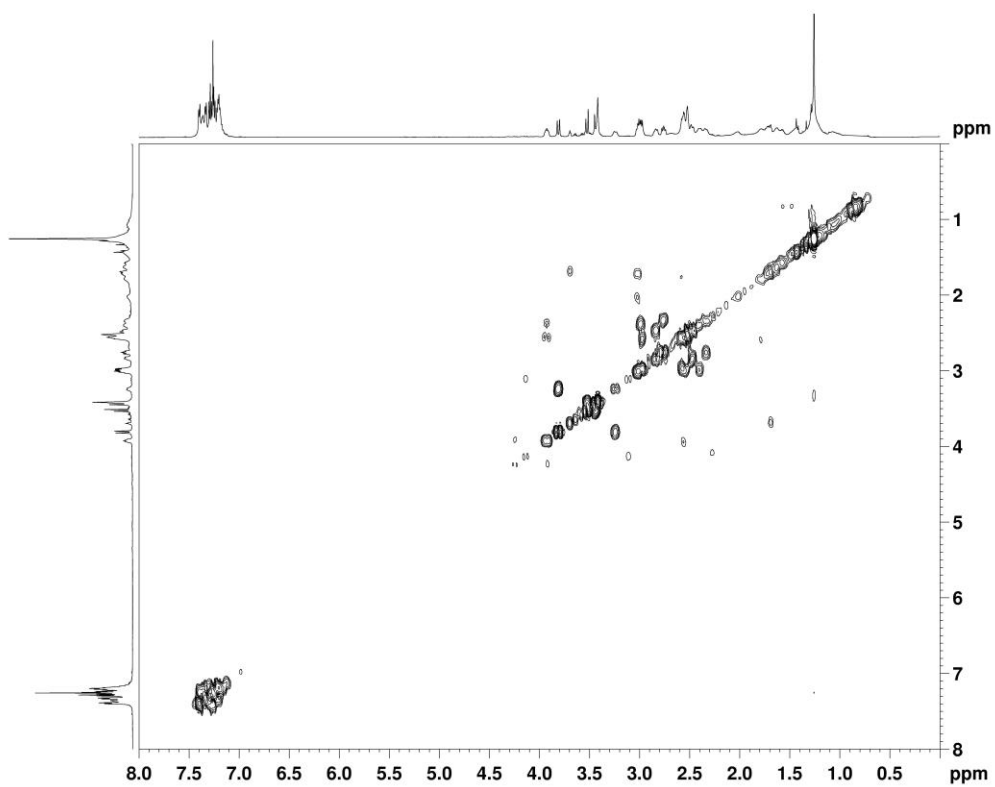

6: COSY NMR (600 MHz, CDCl<sub>3</sub>)

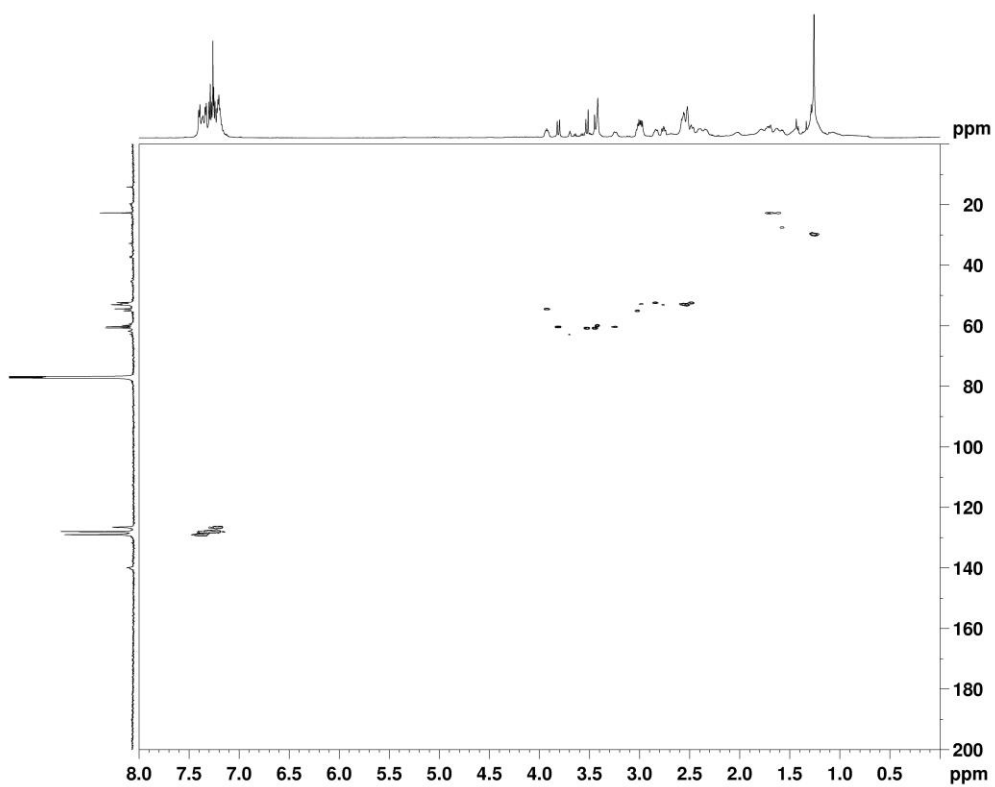

6: HSQC NMR (600 MHz, CDCl<sub>3</sub>)

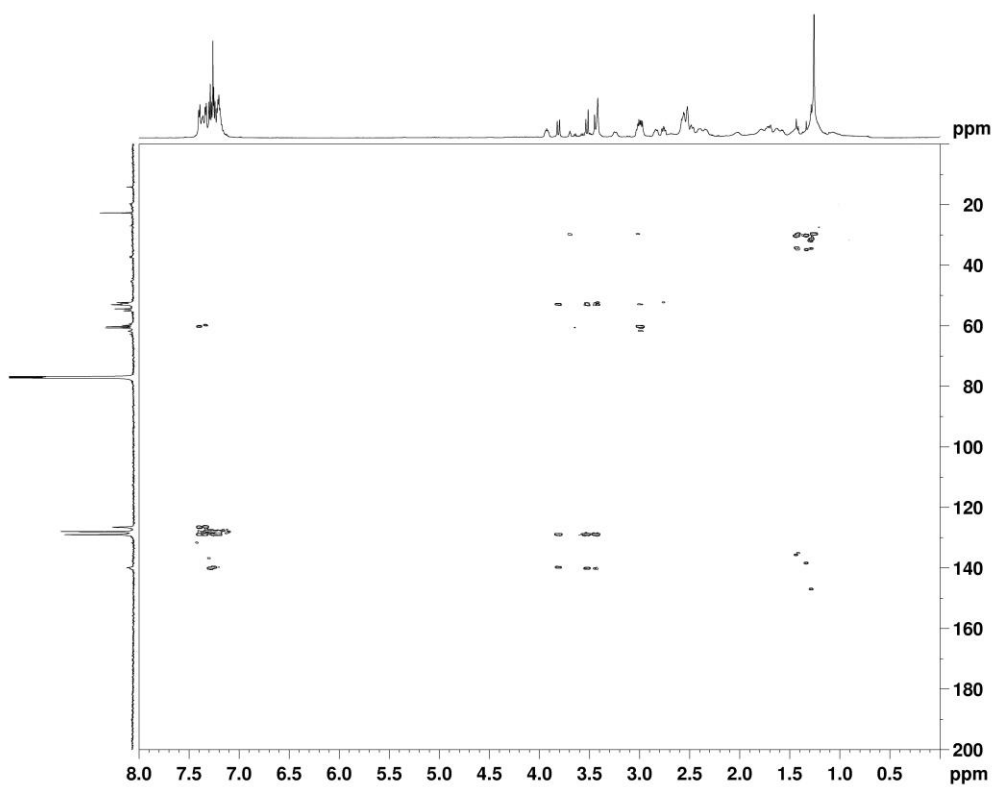

6: HMBC NMR (600 MHz, CDCl<sub>3</sub>)

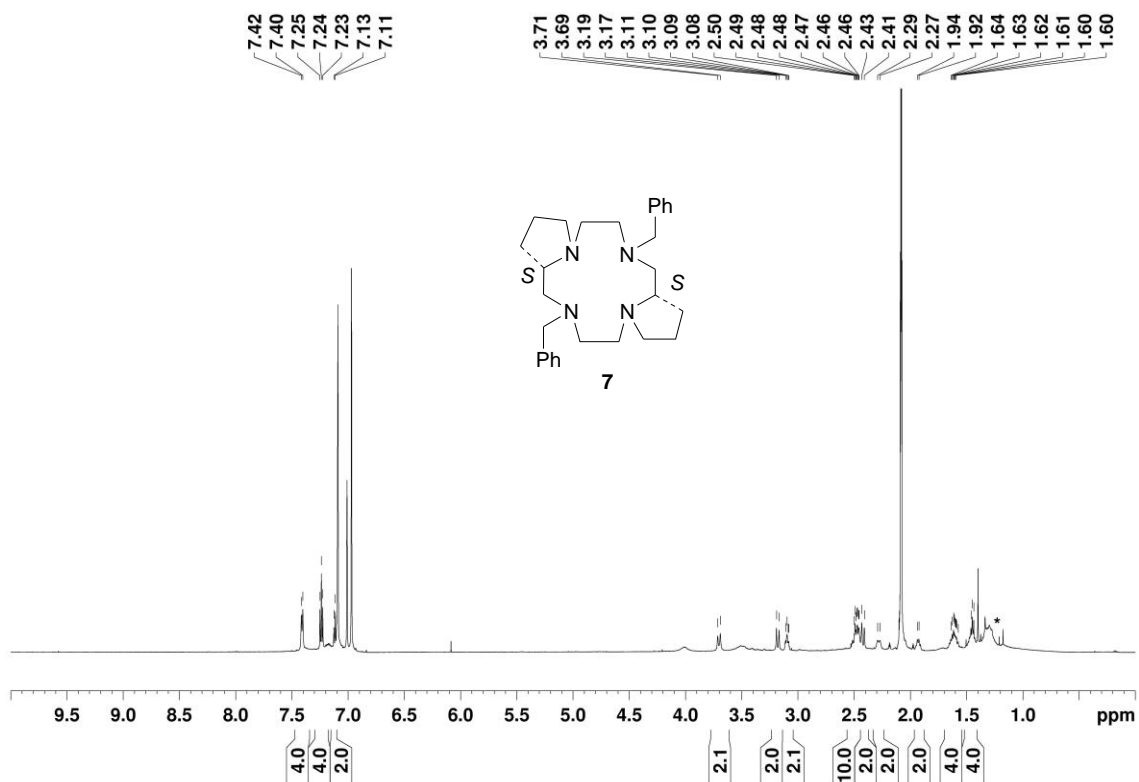

7: <sup>1</sup>H NMR (600 MHz, C<sub>6</sub>D<sub>5</sub>CD<sub>3</sub>)

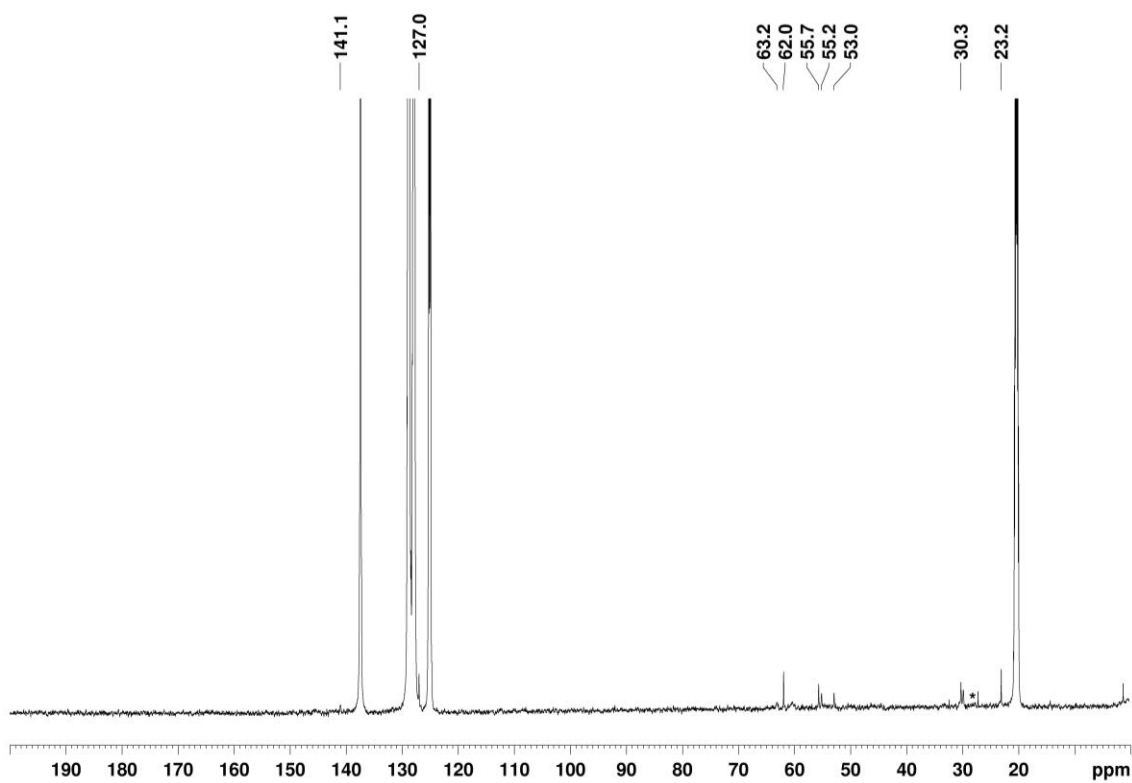

7: <sup>13</sup>C NMR (150 MHz, C<sub>6</sub>D<sub>5</sub>CD<sub>3</sub>). Impurities labelled with an asterisk.

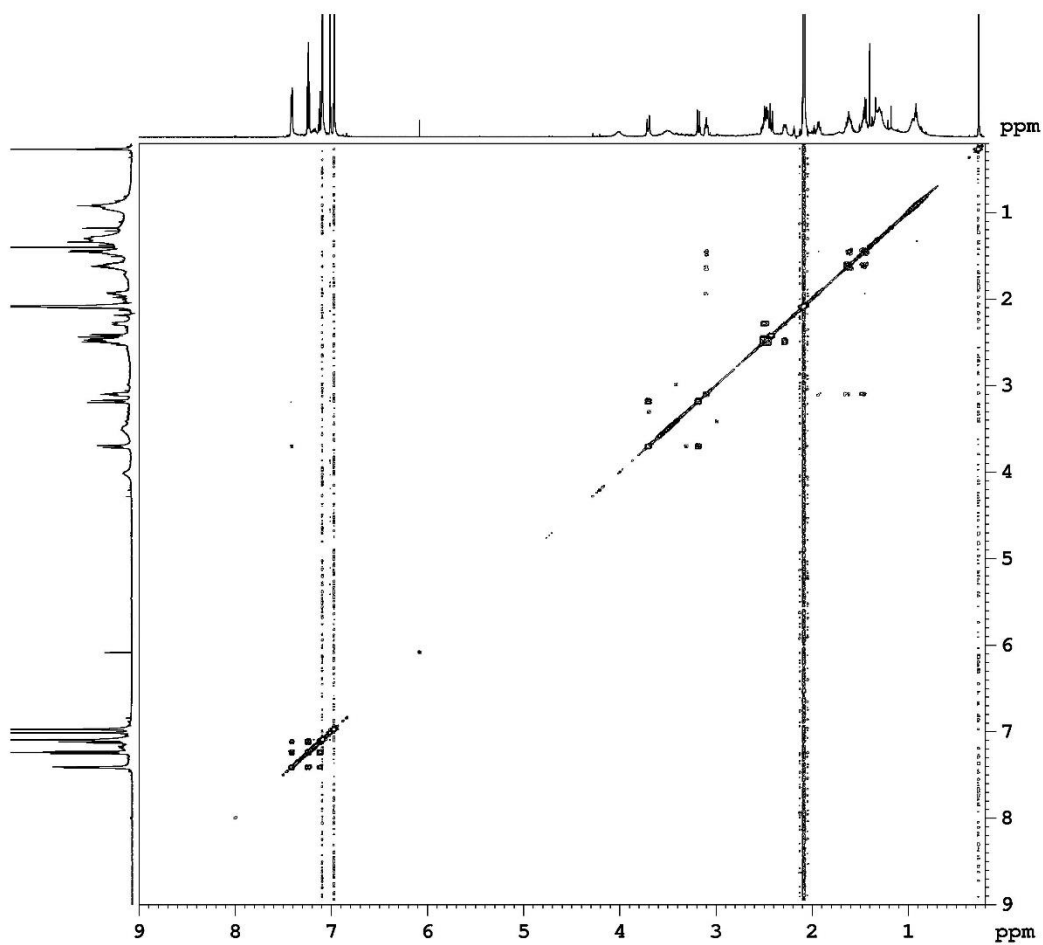

7: COSY NMR (600 MHz, C<sub>6</sub>D<sub>5</sub>CD<sub>3</sub>)

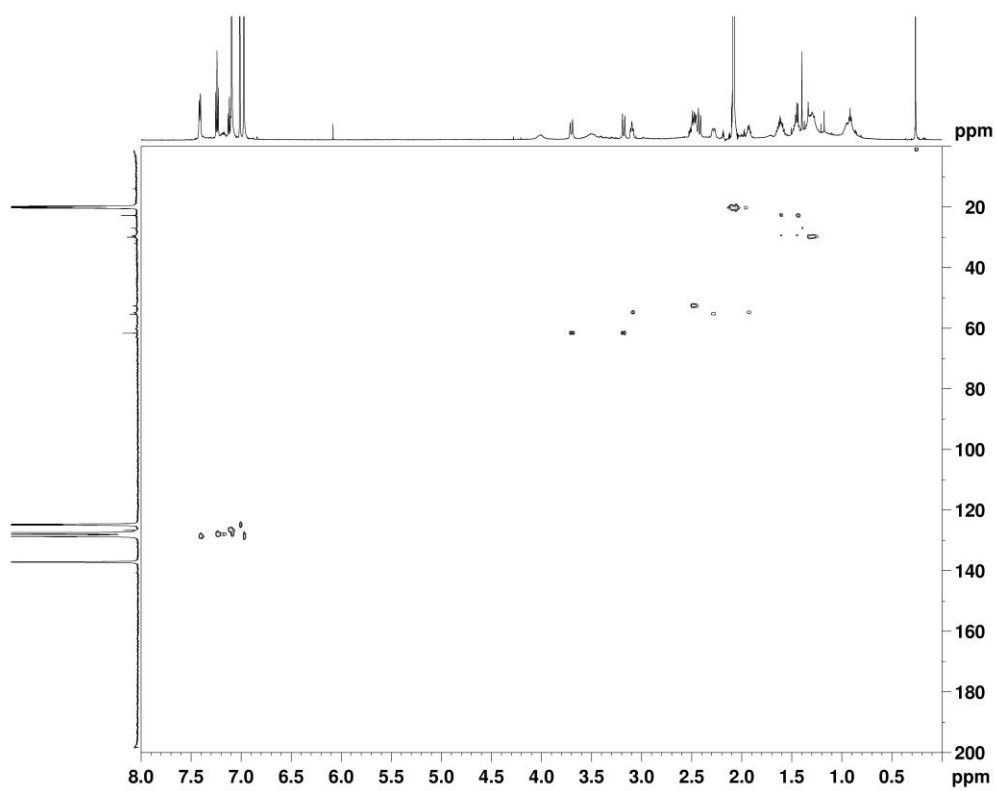

7: HSQC NMR (600 MHz,  $\text{C}_6\text{D}_5\text{CD}_3$ )

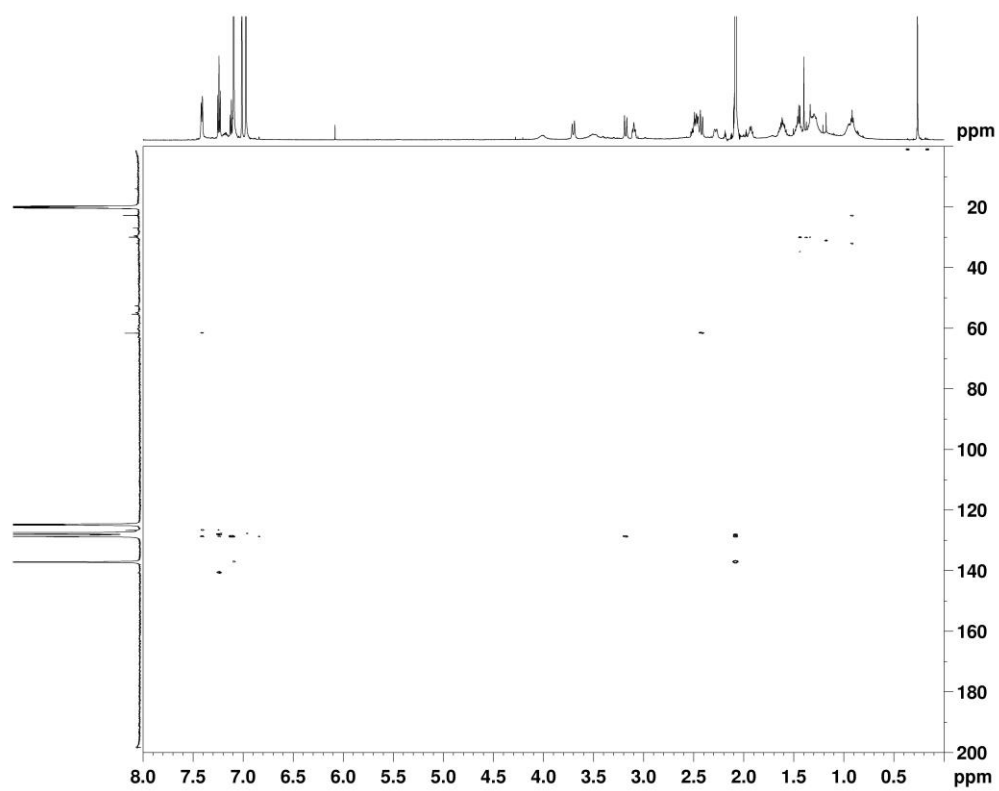

7: HMBC NMR (600 MHz, C<sub>6</sub>D<sub>5</sub>CD<sub>3</sub>)



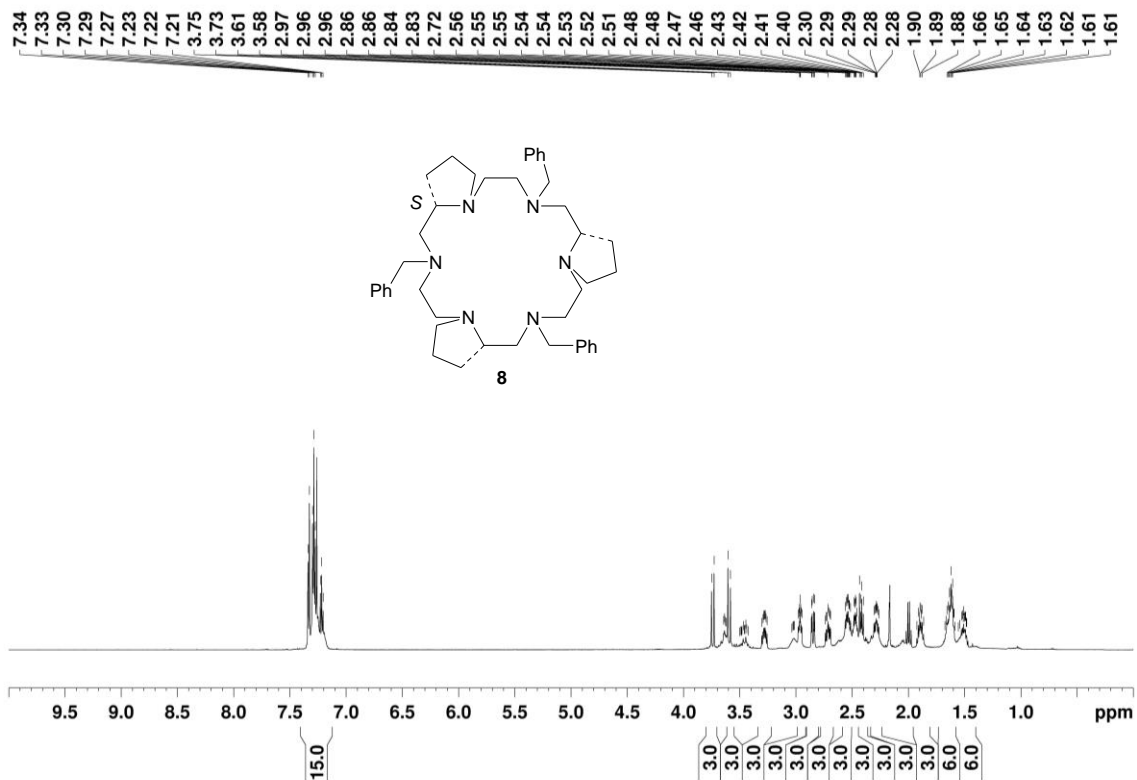

**8**: <sup>1</sup>H NMR (600 MHz, CDCl<sub>3</sub>)

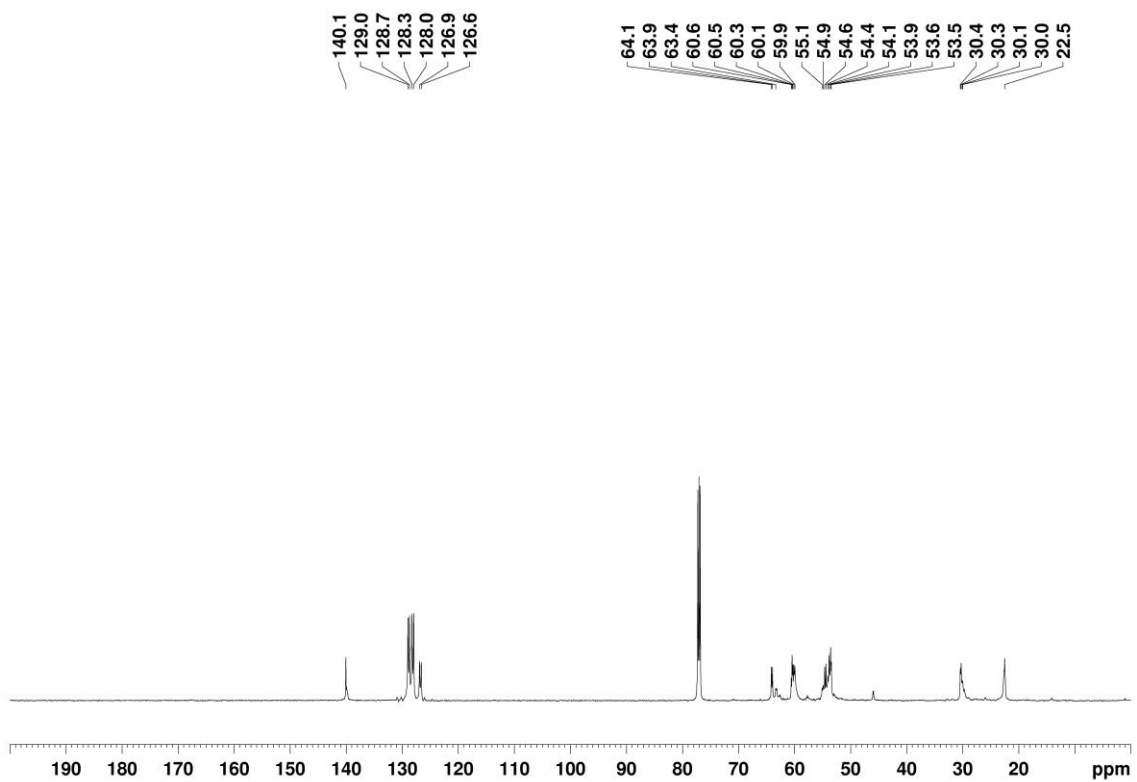

**8**: <sup>13</sup>C NMR (150 MHz, CDCl<sub>3</sub>)

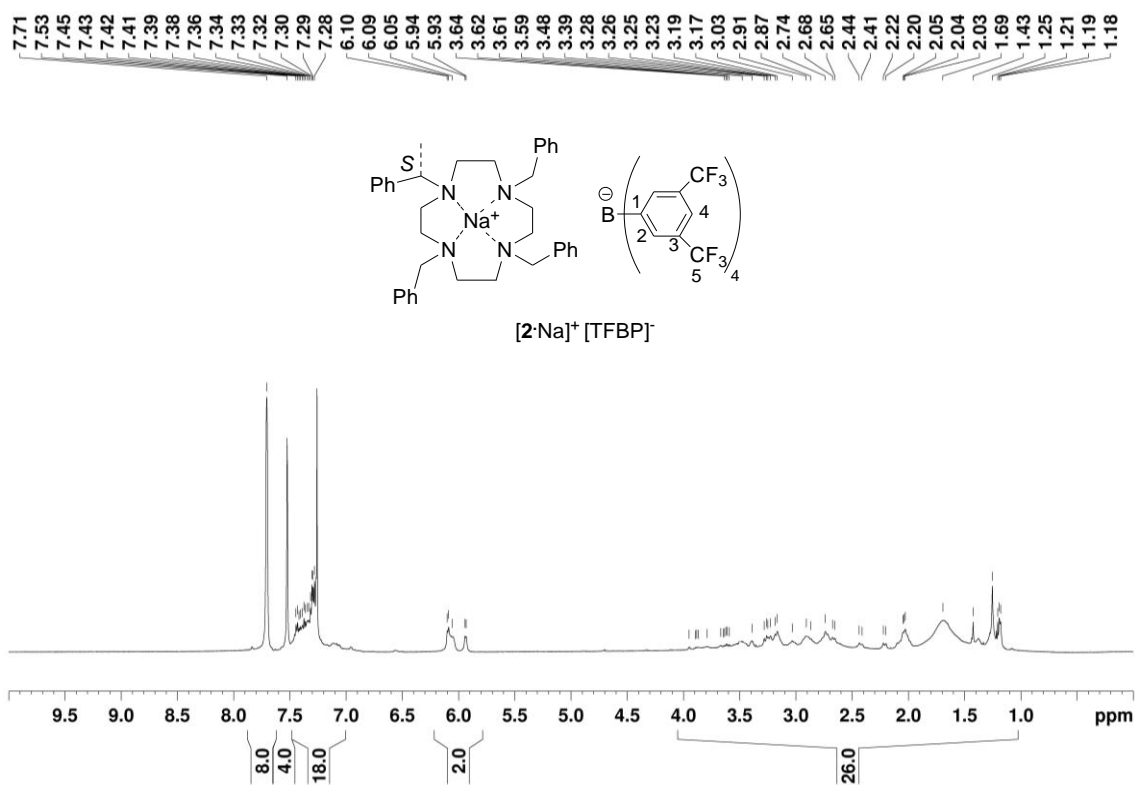

[2·Na]<sup>+</sup>TFPB<sup>-</sup>: <sup>1</sup>H NMR (600 MHz, CDCl<sub>3</sub>).

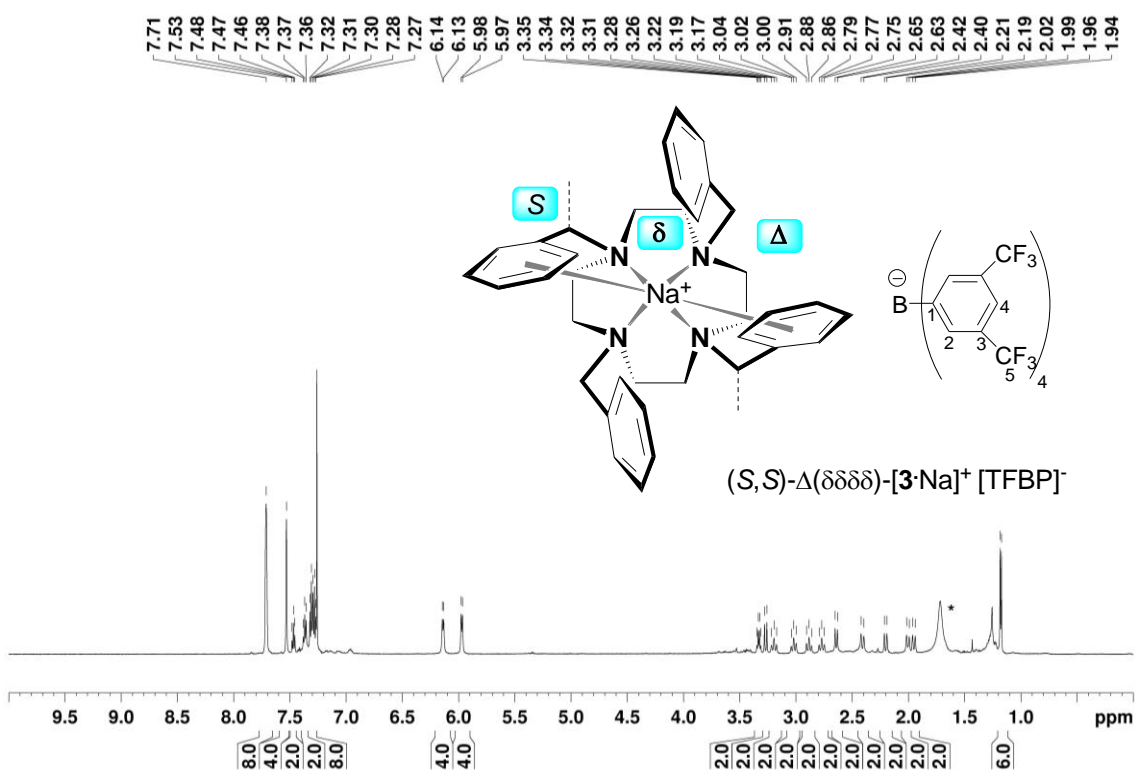

[3·Na]<sup>+</sup>TFPB<sup>-</sup>: <sup>1</sup>H NMR (600 MHz, CDCl<sub>3</sub>). Water impurity labelled with an asterisk.

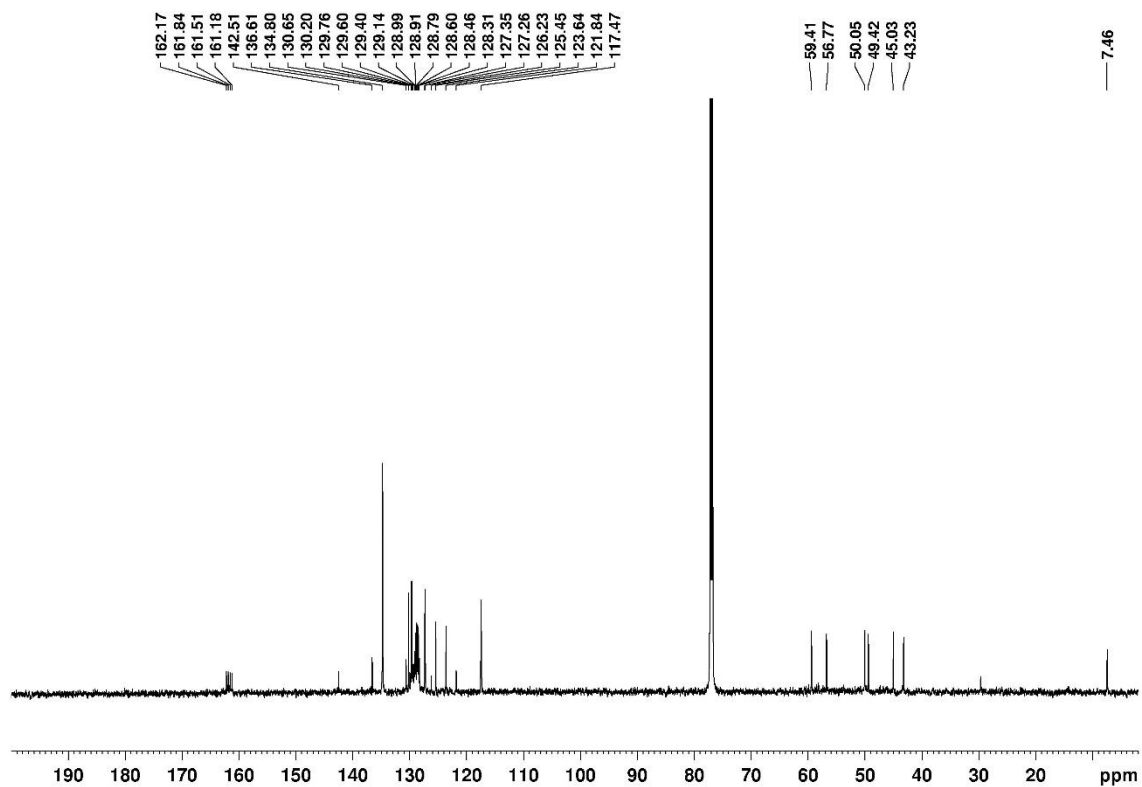

$[3\cdot\text{Na}]^+\text{TFPB}^-$ :  $^{13}\text{C}$  NMR (150 MHz,  $\text{CDCl}_3$ ).

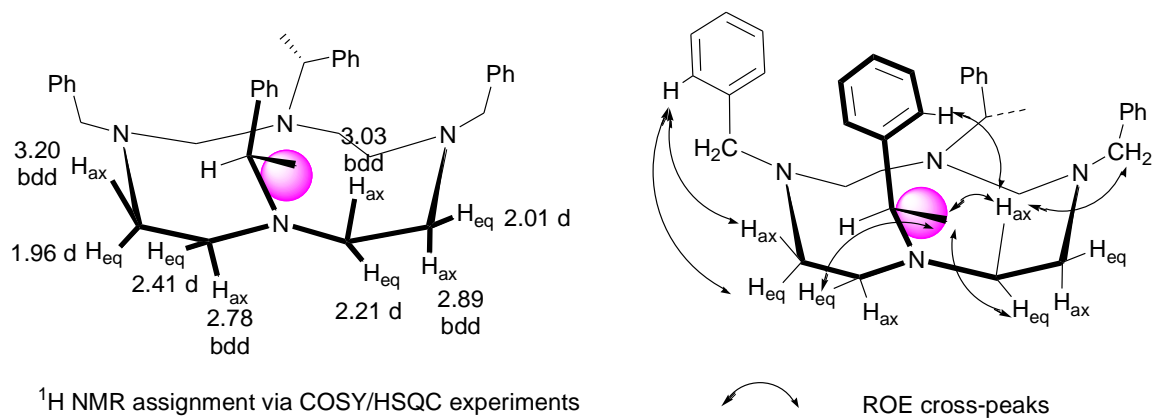

**Figure S1.**  $^1\text{H}$  NMR assignment for complex  $[3\cdot\text{Na}]^+\text{TFPB}^-$ .

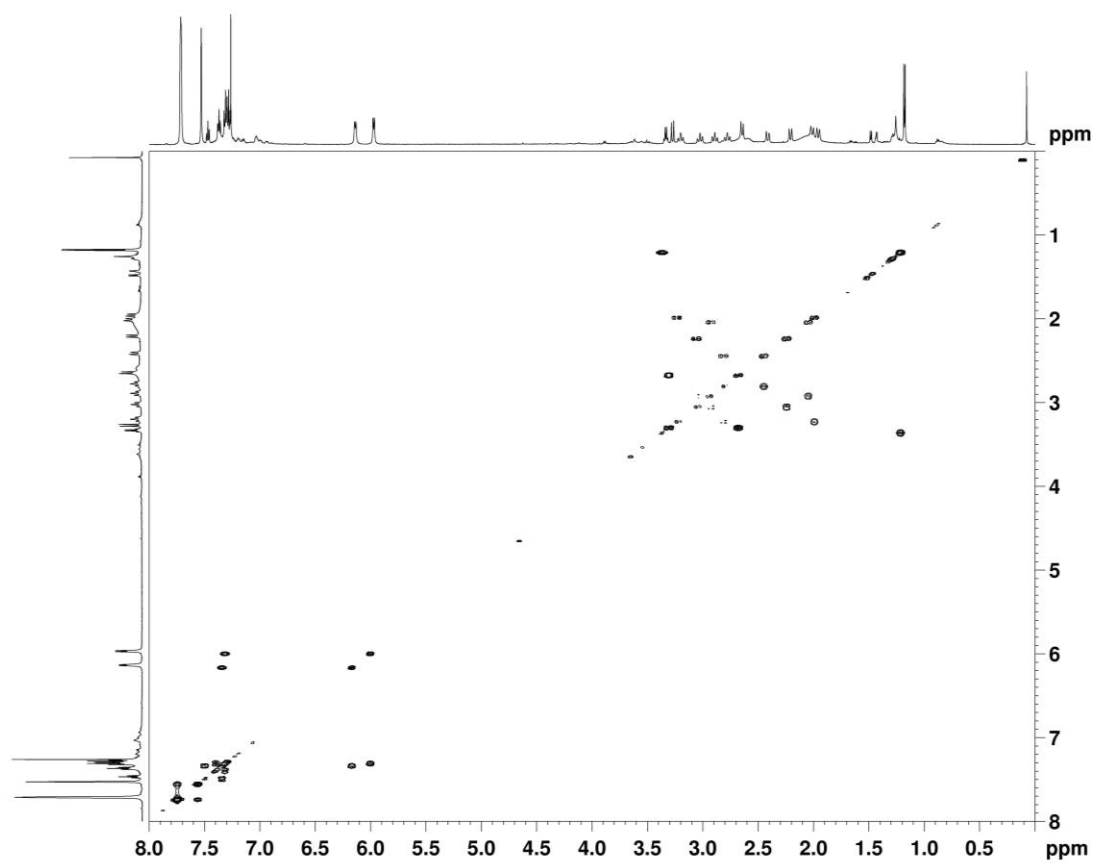

**[3·Na]<sup>+</sup>TFPB<sup>-</sup>**: COSY NMR (600 MHz, CDCl<sub>3</sub>)

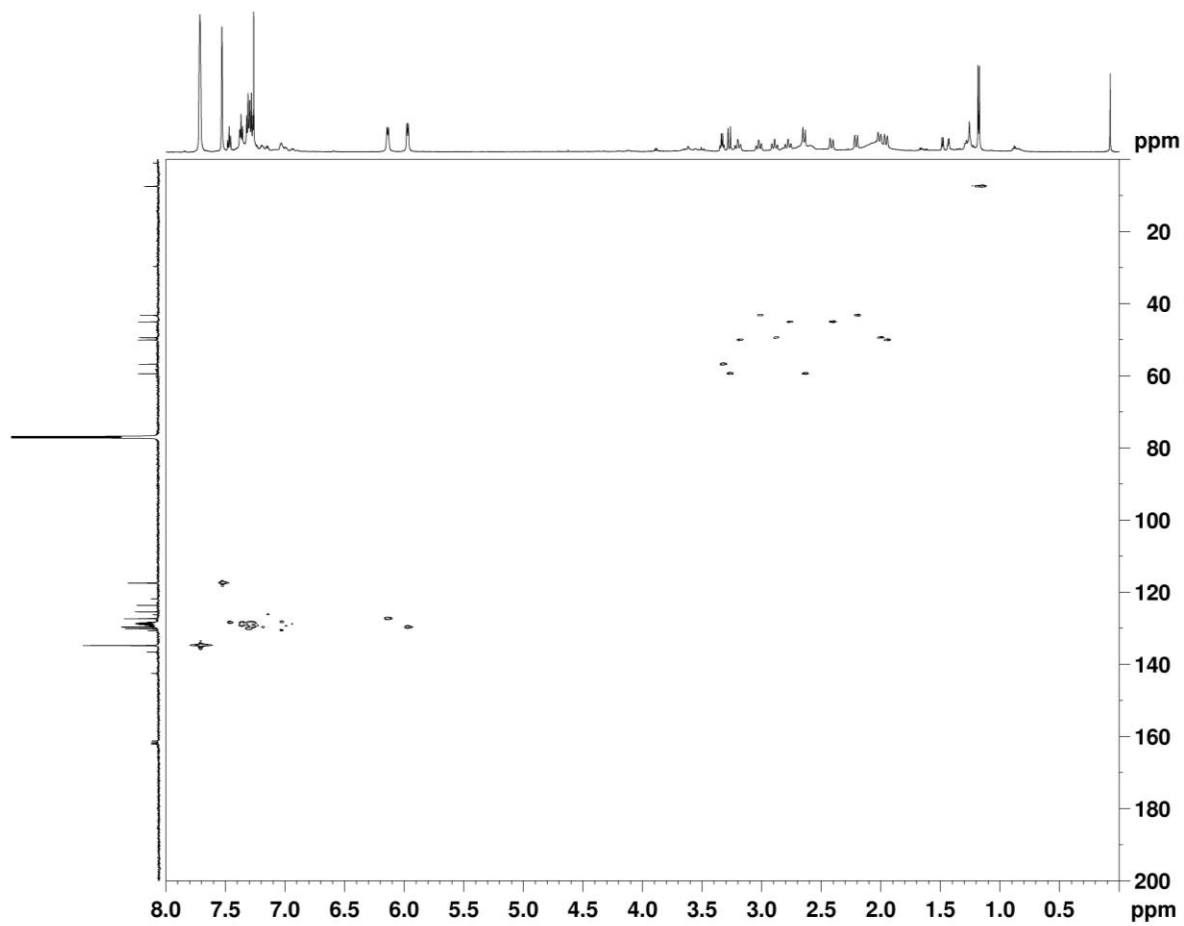

**[3·Na]<sup>+</sup>TFPB<sup>-</sup>**: HSQC NMR (600 MHz, CDCl<sub>3</sub>)

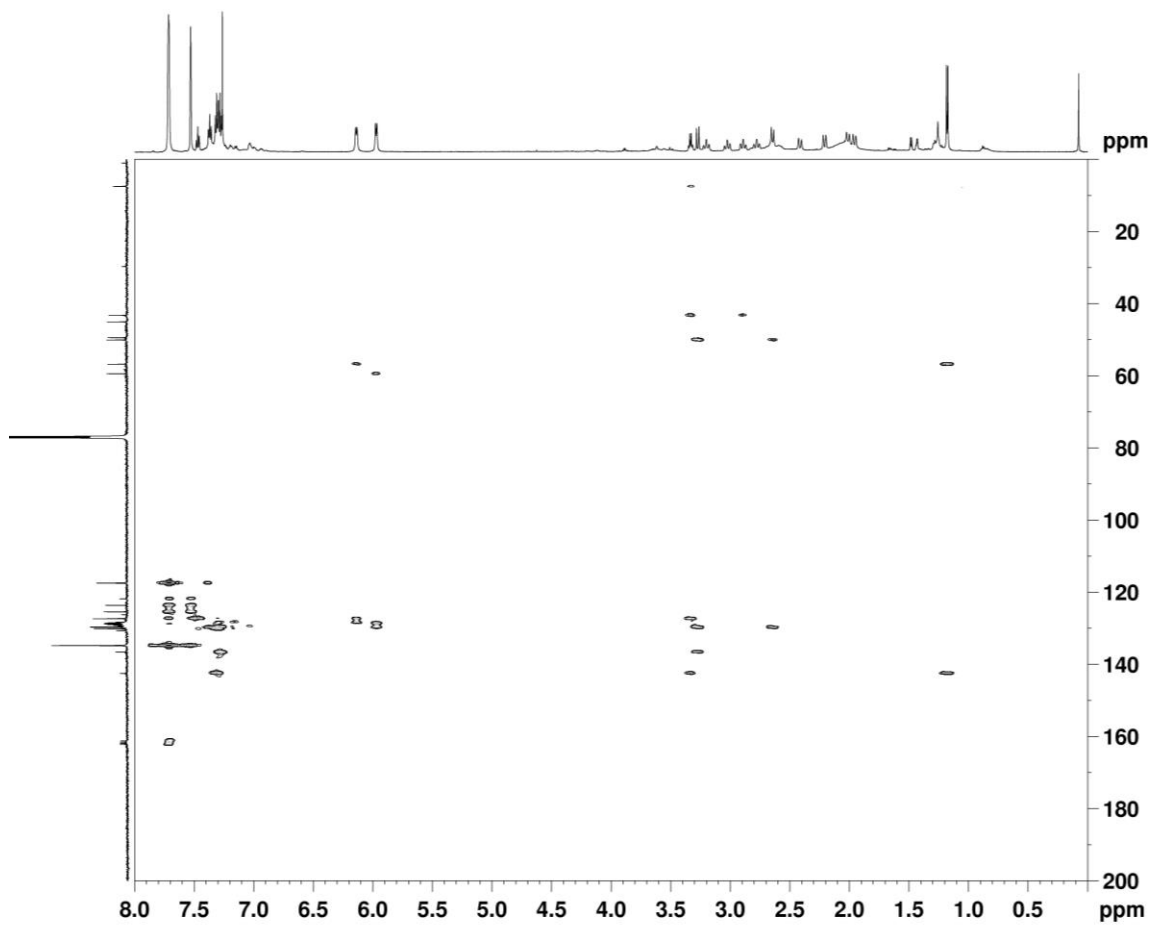

$[3 \cdot Na]^+ TFPB^-$ : HMBC NMR (600 MHz,  $CDCl_3$ )

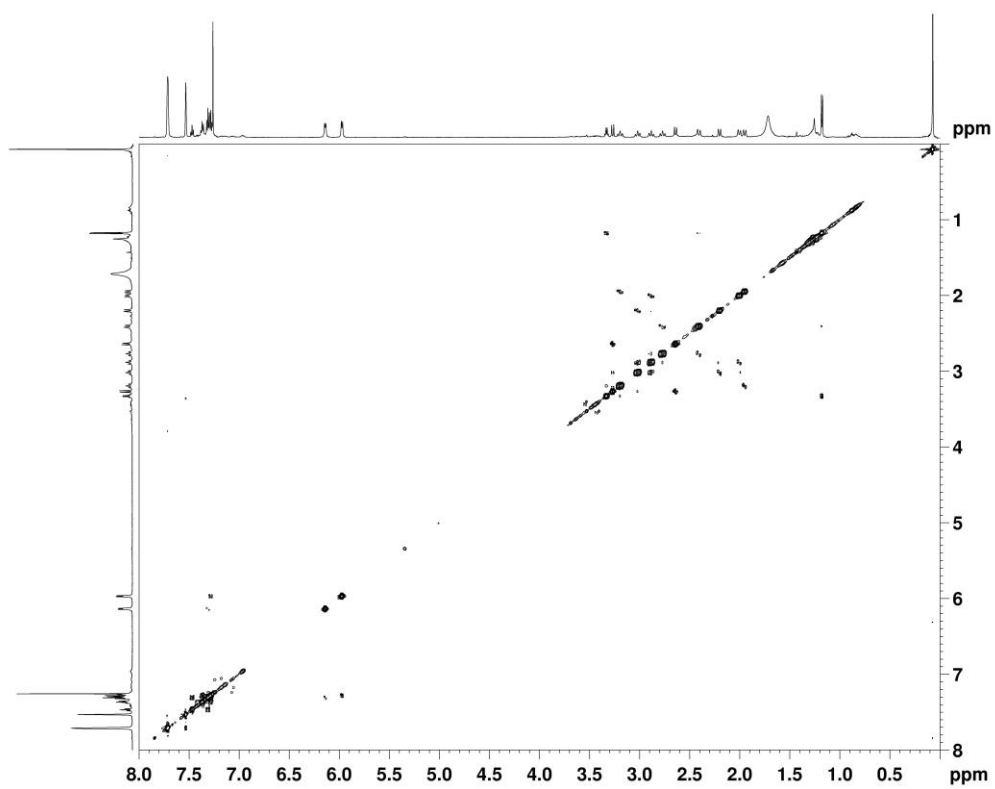

**[3·Na]<sup>+</sup>TFPB<sup>-</sup>**: ROESY NMR (600 MHz, CDCl<sub>3</sub>)

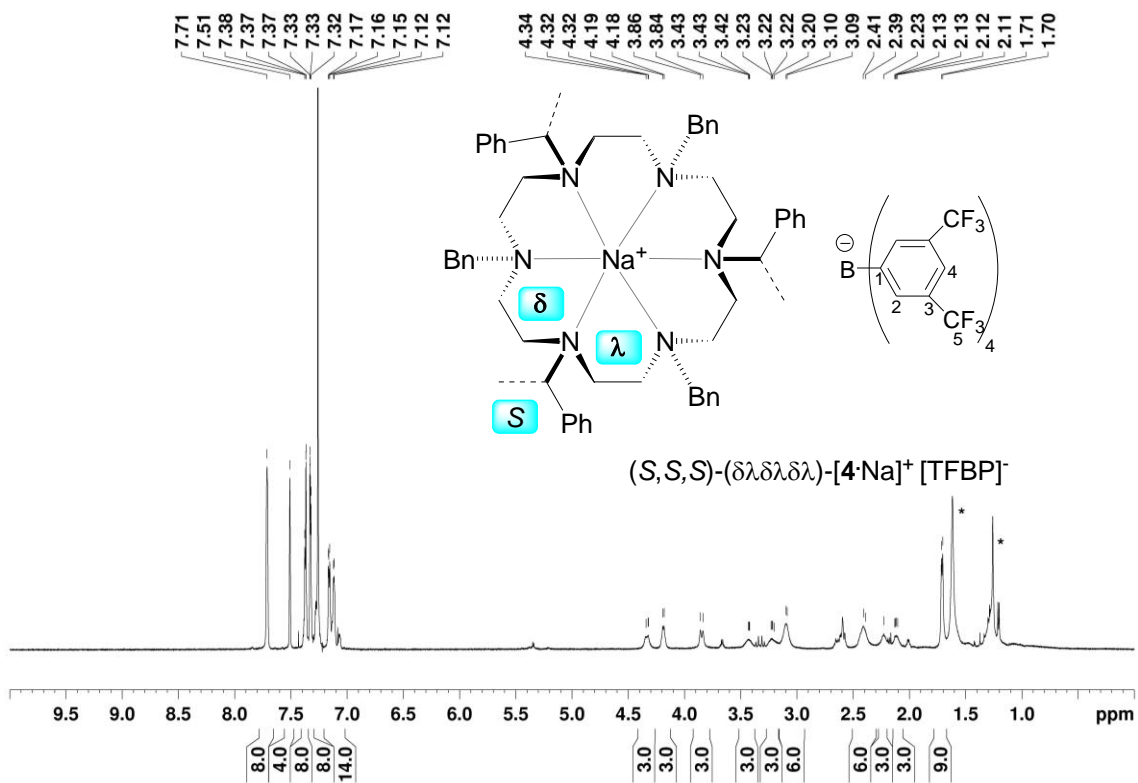

$[4\cdot Na]^+ [TFBP]^-$ :  $^1H$  NMR (600 MHz,  $CDCl_3$ ) Water and grease impurities are labelled with asterisks.

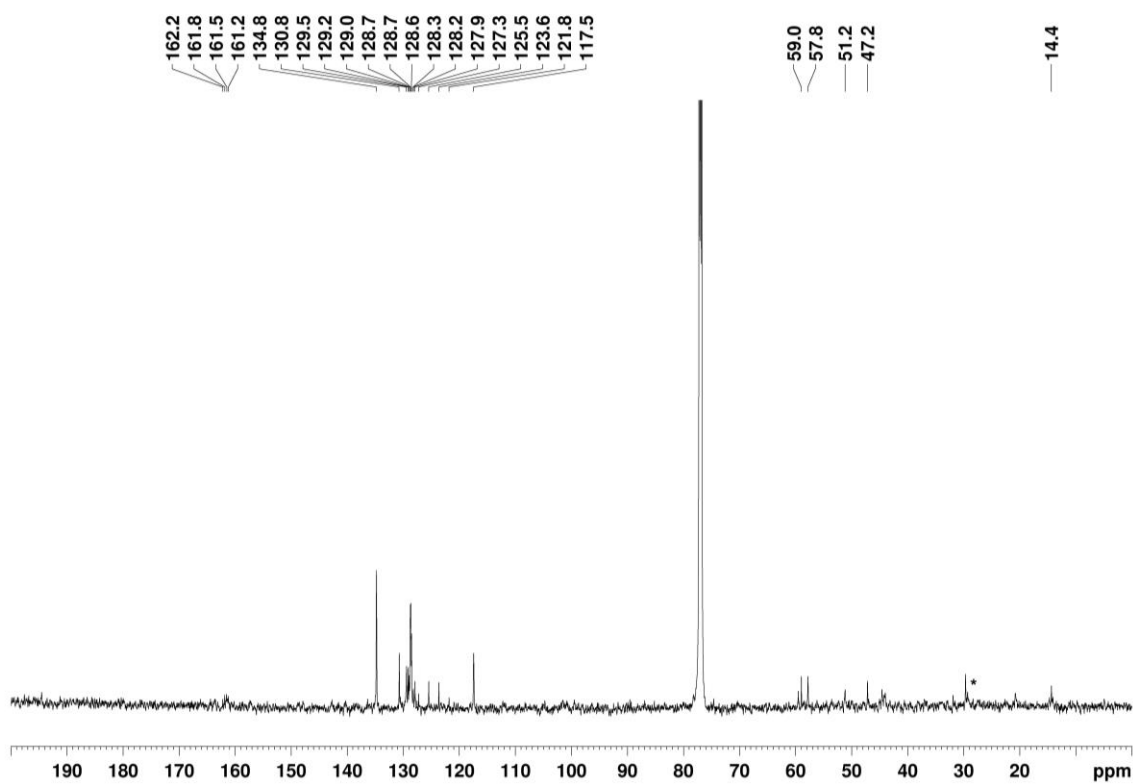

$[4\cdot Na]^+ [TFBP]^-$ :  $^{13}C$  NMR (600 MHz,  $CDCl_3$ ). Grease impurity labelled with an asterisk.



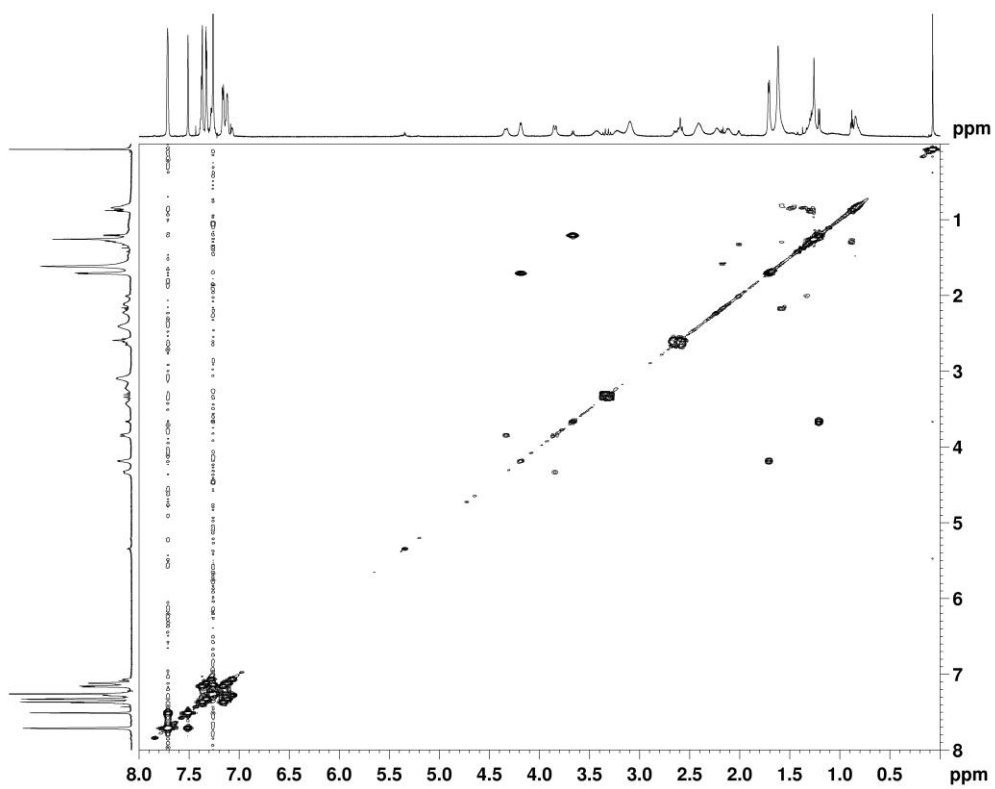

**[4-Na]<sup>+</sup>TFPB<sup>-</sup>**: COSY NMR (600 MHz, CDCl<sub>3</sub>)

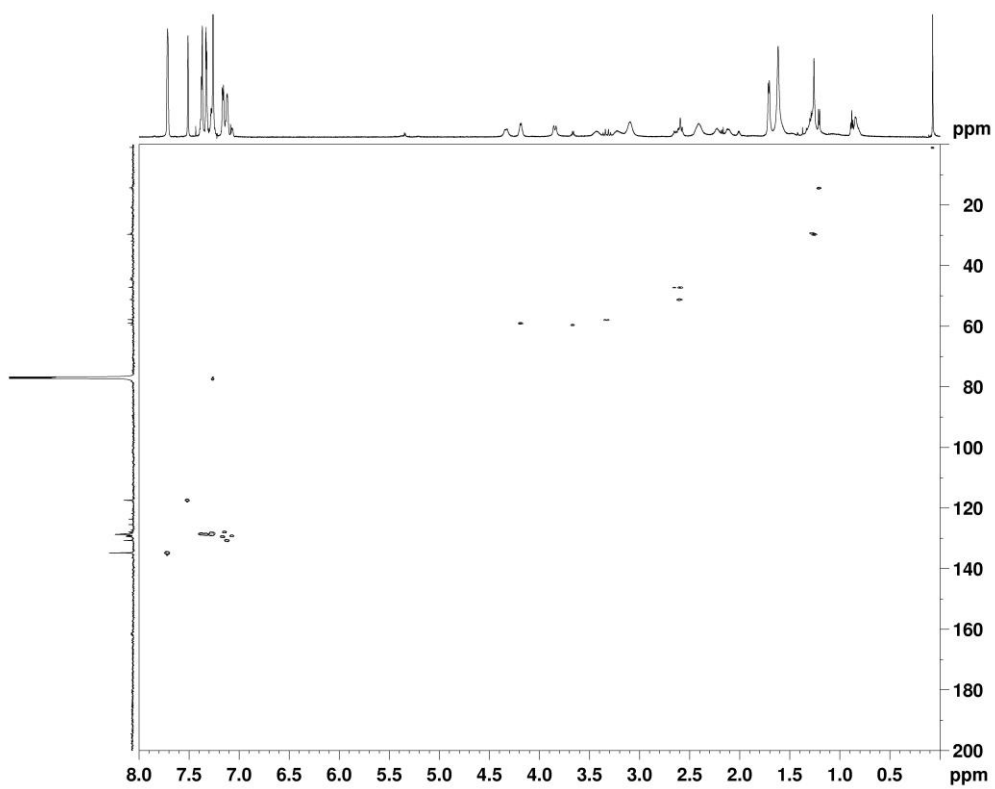

**[4·Na]<sup>+</sup>TFPB<sup>-</sup>**: HSQC NMR (600 MHz, CDCl<sub>3</sub>)

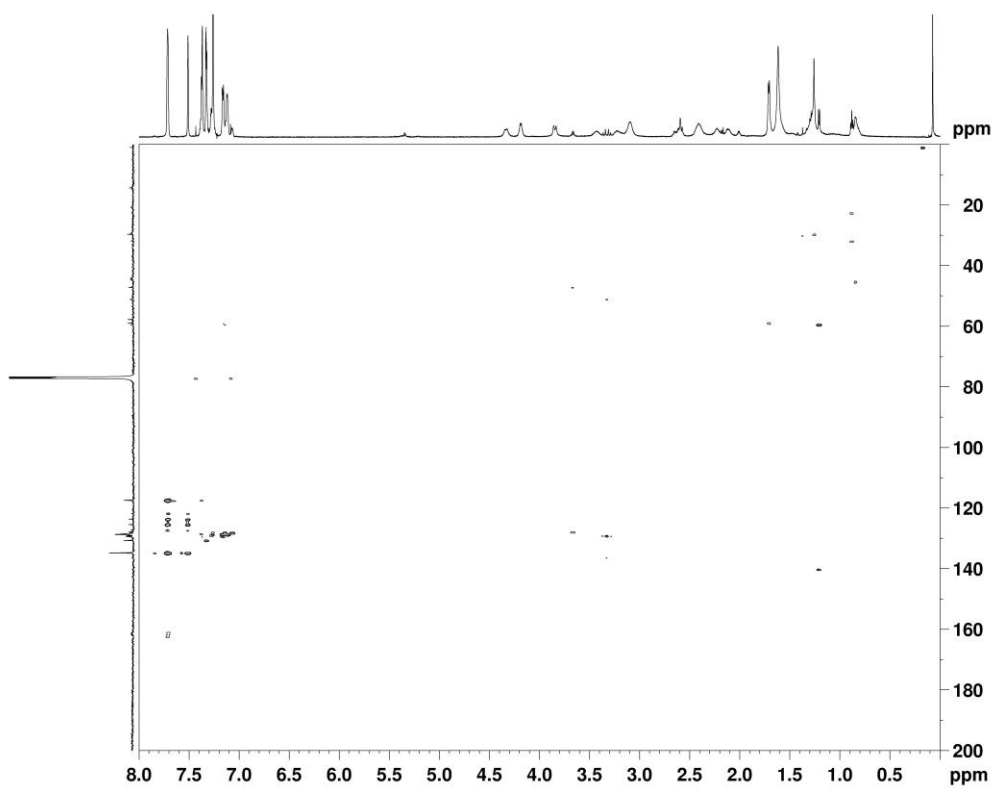

[4·Na]<sup>+</sup>TFPB: HMBC NMR (600 MHz, CDCl<sub>3</sub>)

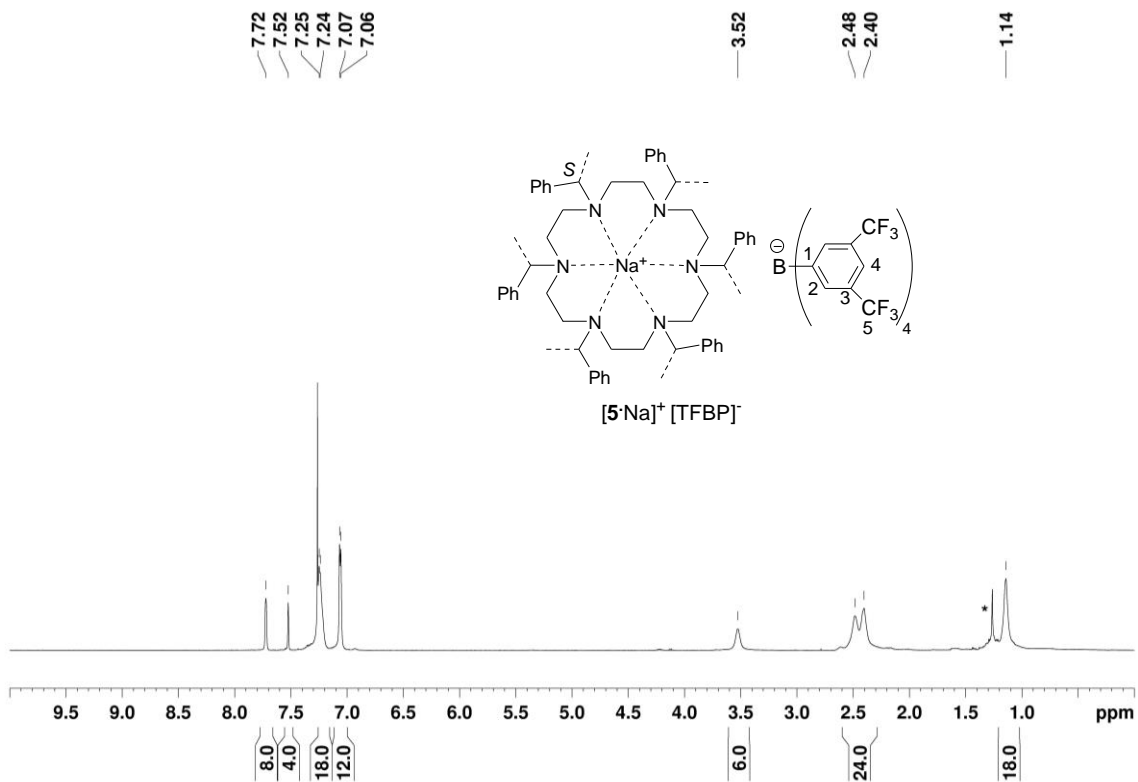

$[5\cdot\text{Na}]^+\text{TFPB}$ :  $^1\text{H NMR}$  (600 MHz,  $\text{CDCl}_3$ ). Grease impurity labelled with an asterisk.

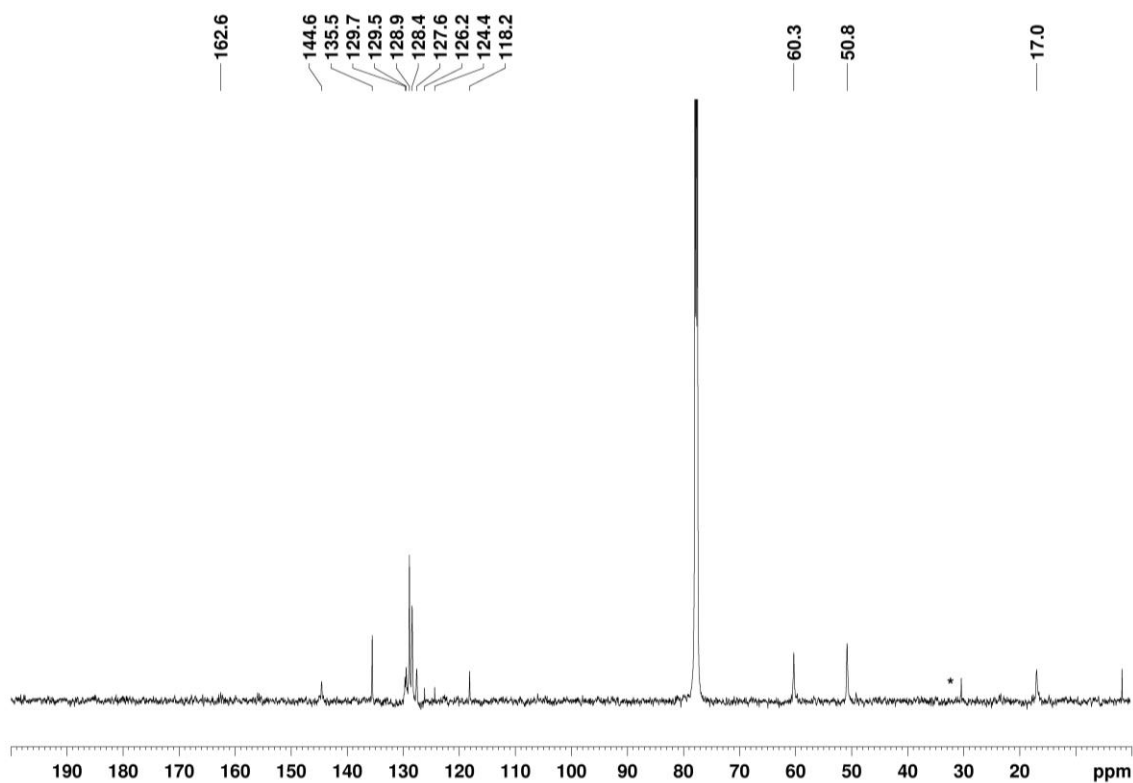

$[5\cdot\text{Na}]^+\text{TFPB}$ :  $^{13}\text{C NMR}$  (150 MHz,  $\text{CDCl}_3$ ). Grease impurity labelled with an asterisk.



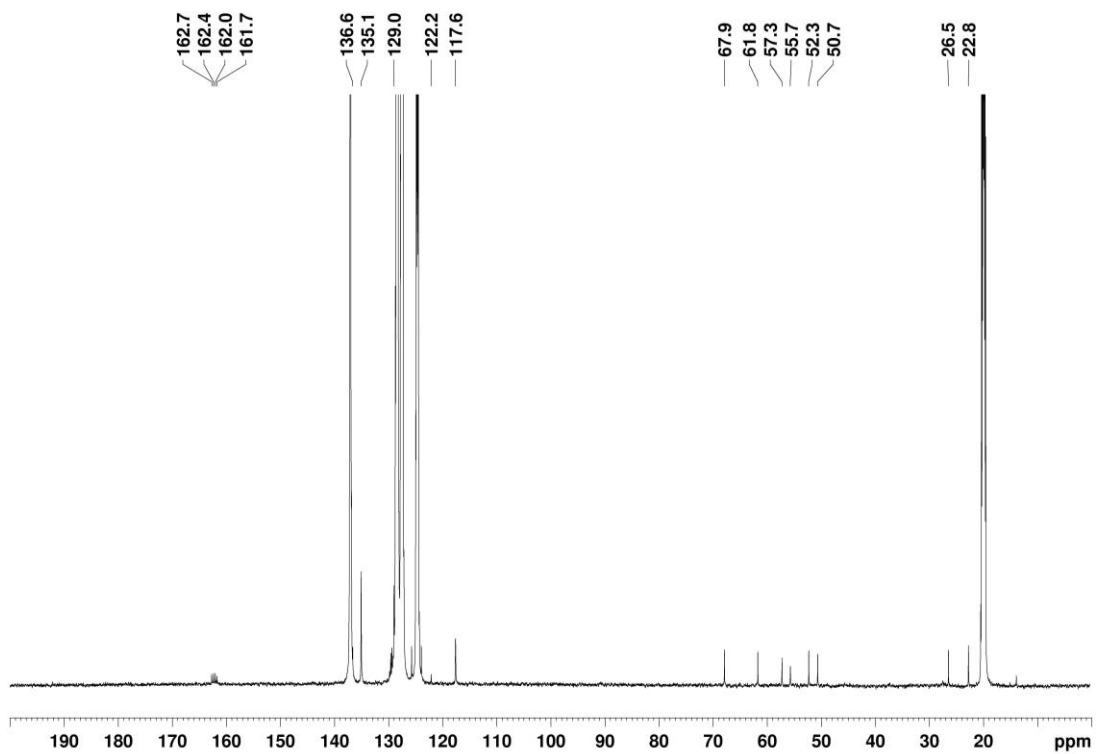

[7-Na]<sup>+</sup>TFPB<sup>-</sup>: <sup>13</sup>C NMR (150 MHz, C<sub>6</sub>D<sub>5</sub>CD<sub>3</sub>)

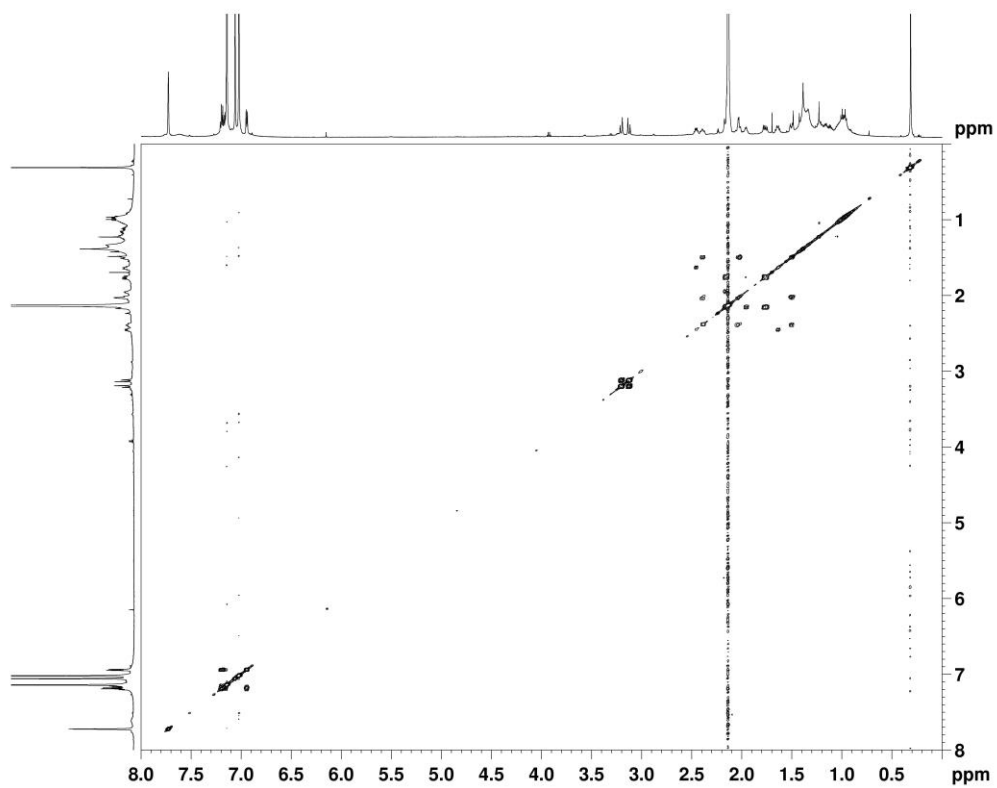

[7-Na]<sup>+</sup>TFPB<sup>-</sup>: COSY NMR (600 MHz, C<sub>6</sub>D<sub>5</sub>CD<sub>3</sub>)

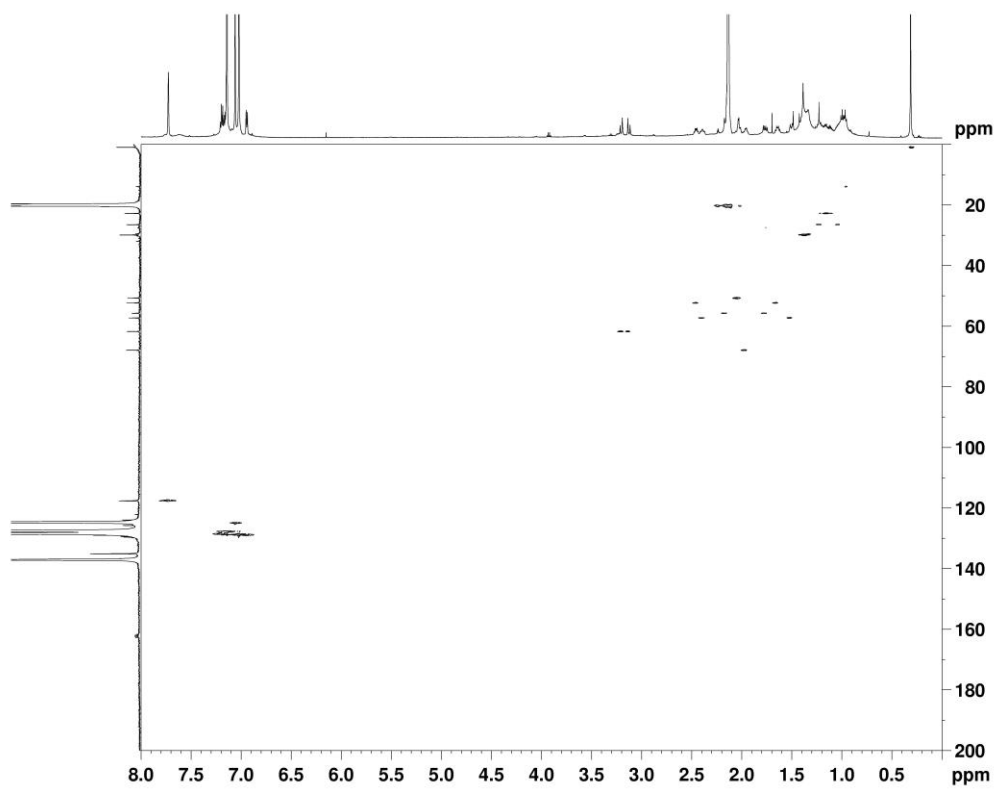

**[7·Na]<sup>+</sup>TFPB**: HSQC NMR (600 MHz, C<sub>6</sub>D<sub>5</sub>CD<sub>3</sub>)

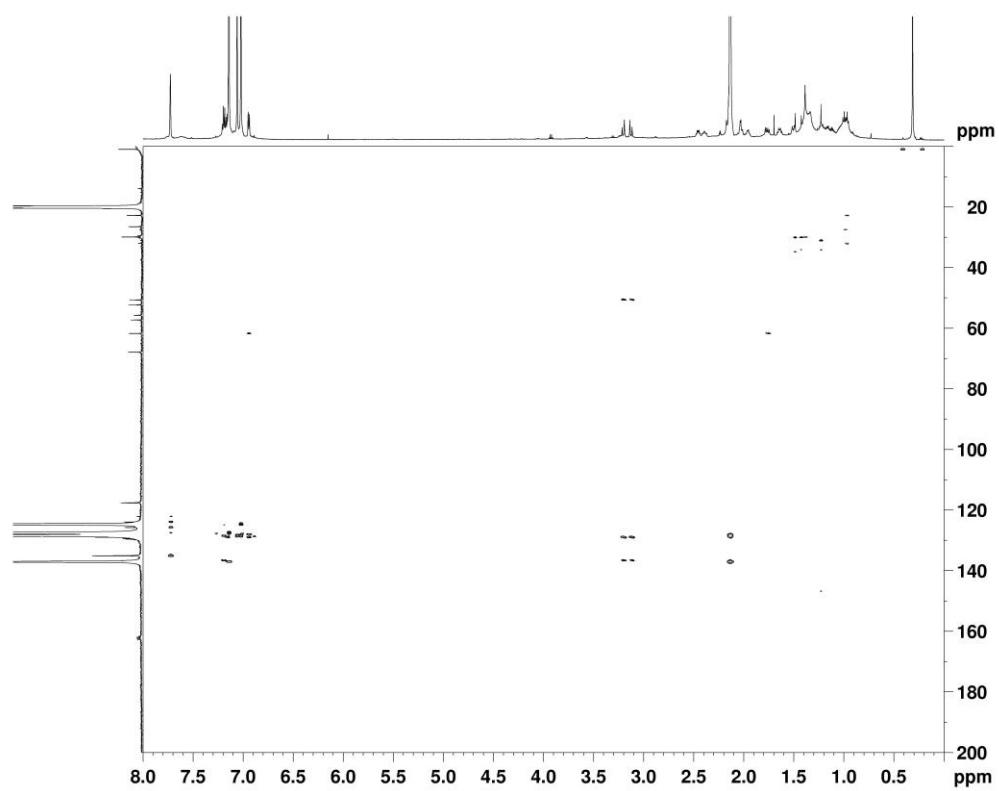

**[7·Na]<sup>+</sup>TFPB**: HMBC NMR (600 MHz, C<sub>6</sub>D<sub>5</sub>CD<sub>3</sub>)



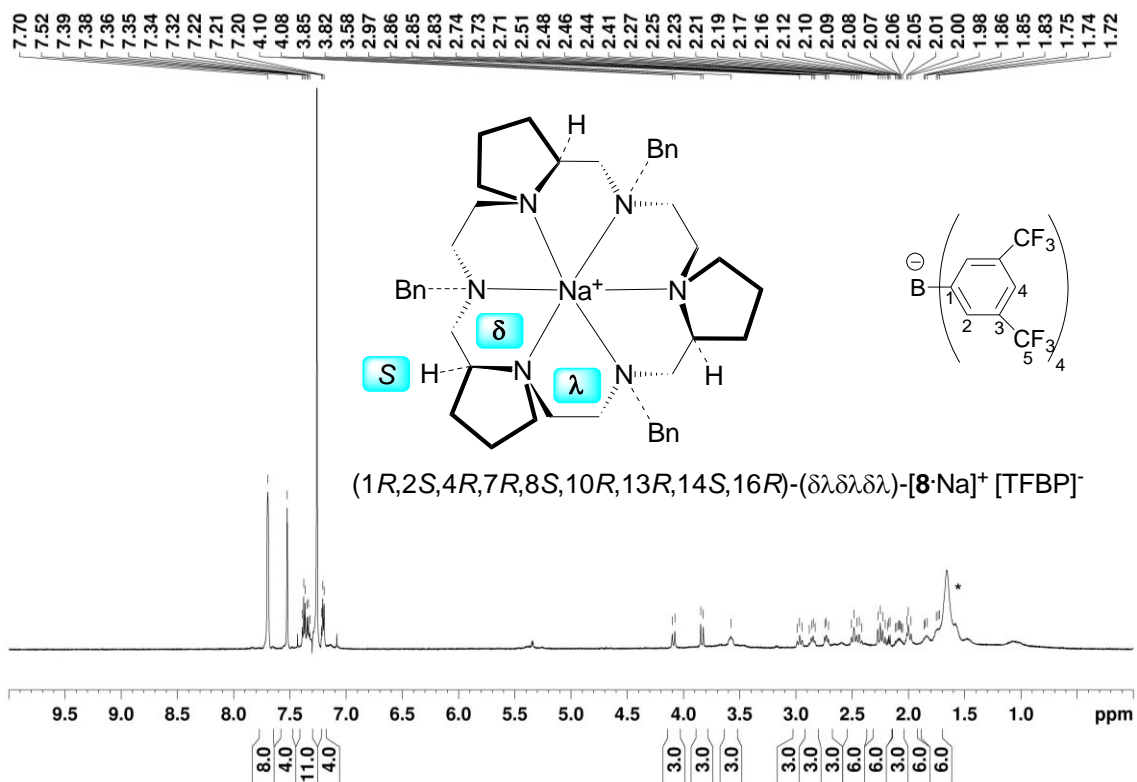

[8·Na]<sup>+</sup>TFPB: <sup>1</sup>H NMR (600 MHz, CDCl<sub>3</sub>). Water impurity labelled with an asterisk.

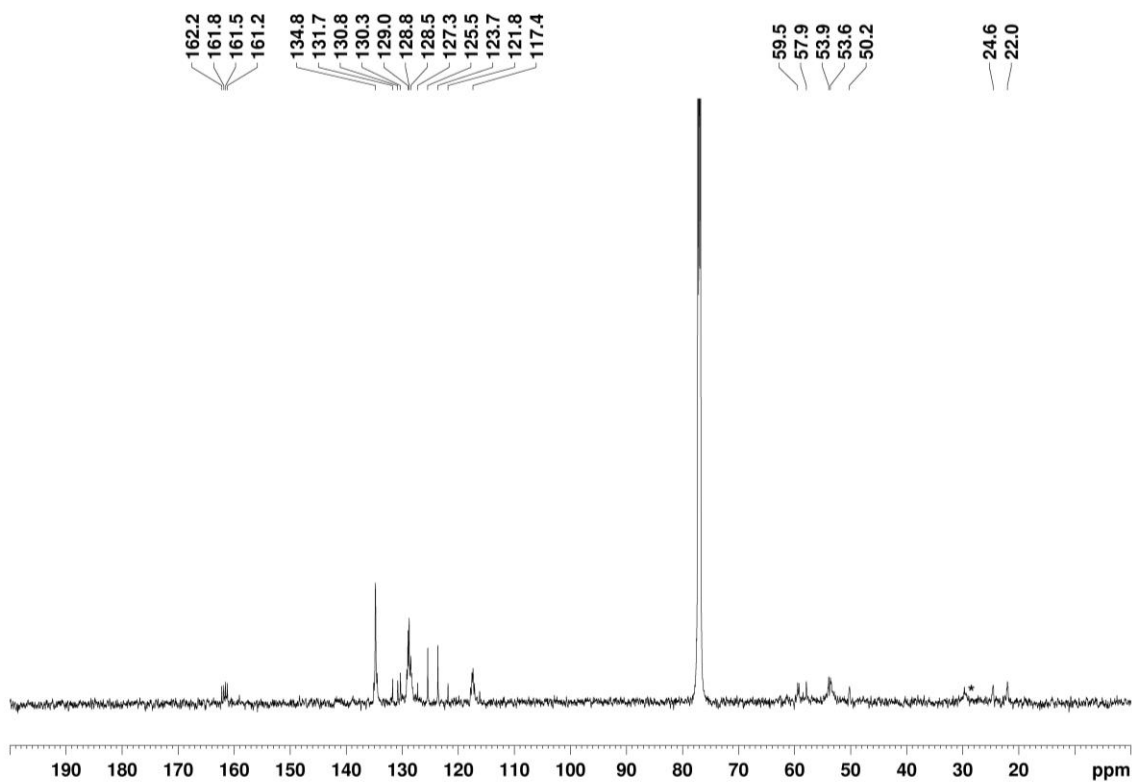

[8·Na]<sup>+</sup>TFPB: <sup>13</sup>C NMR (150 MHz, CDCl<sub>3</sub>). Grease impurity labelled with an asterisk.

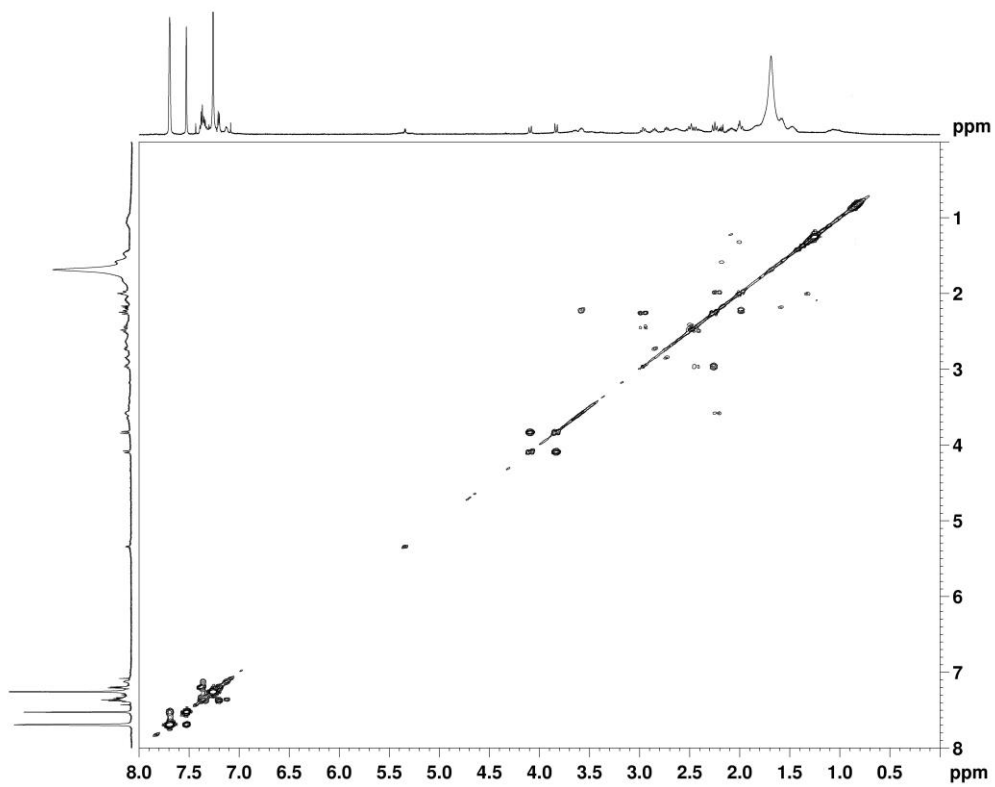

**[8·Na]<sup>+</sup>TFPB<sup>-</sup>**: COSY NMR (600 MHz, CDCl<sub>3</sub>)

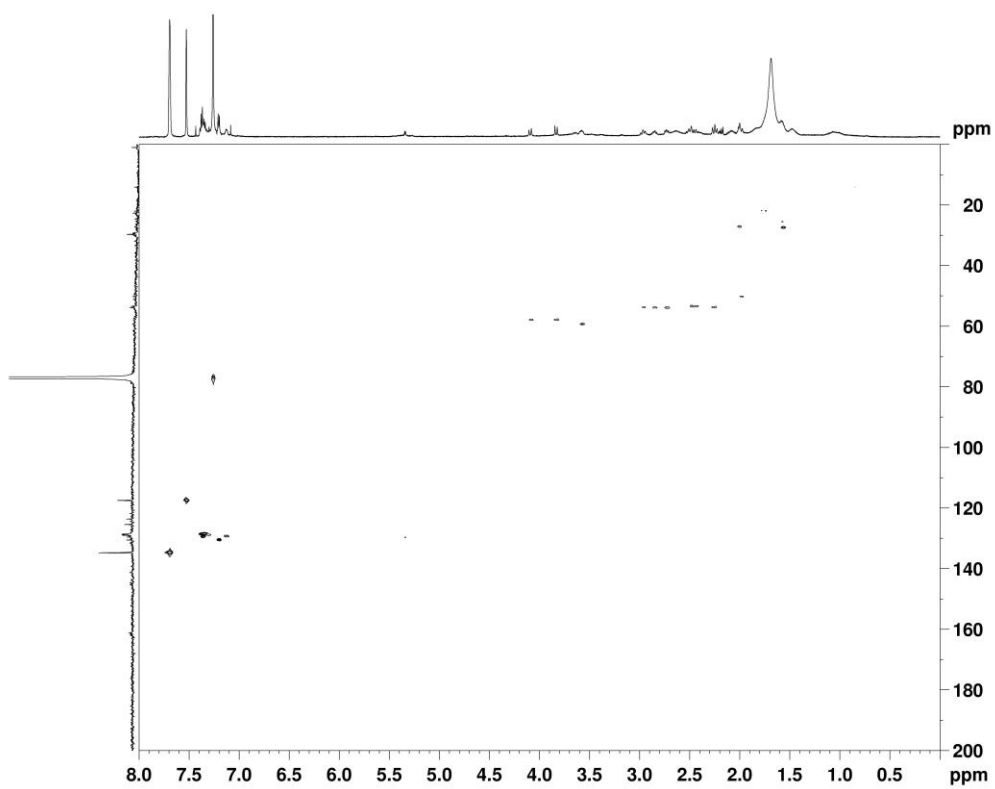

**[8·Na]<sup>+</sup>TFPB<sup>-</sup>**: HSQC NMR (600 MHz, CDCl<sub>3</sub>)

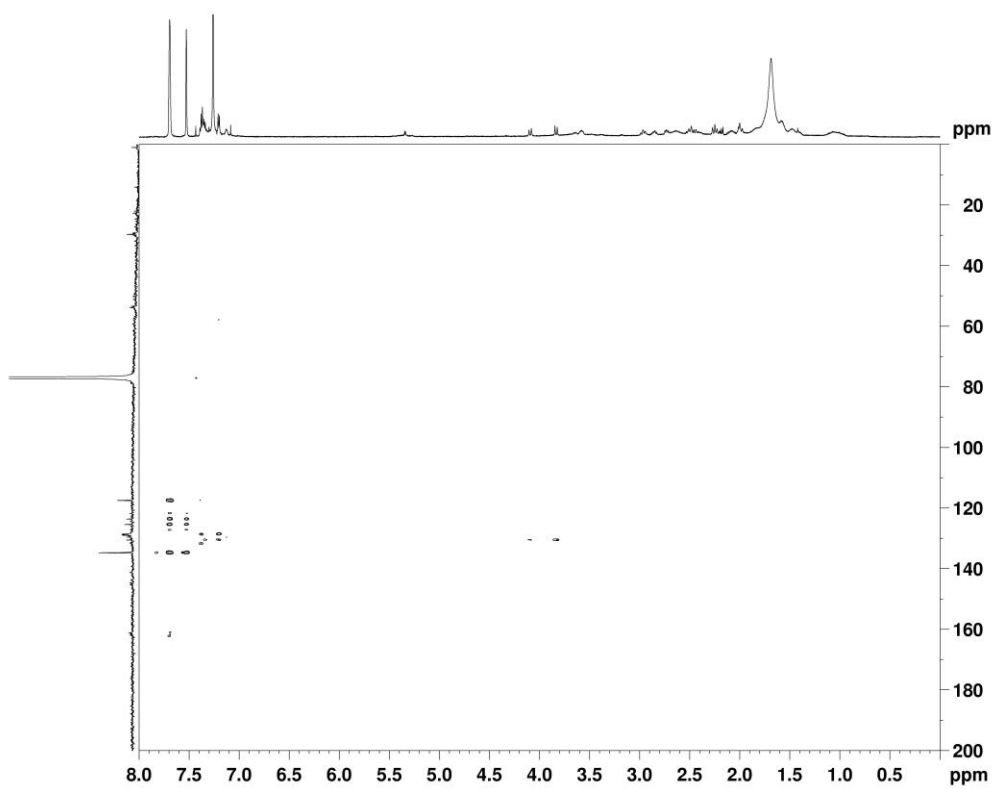

**[8·Na]<sup>+</sup>TFPB<sup>-</sup>**: HMBC NMR (600 MHz, CDCl<sub>3</sub>)

## 2.2 $^1\text{H}$ NMR titrations with NaTFPB (Figures S2-S9)

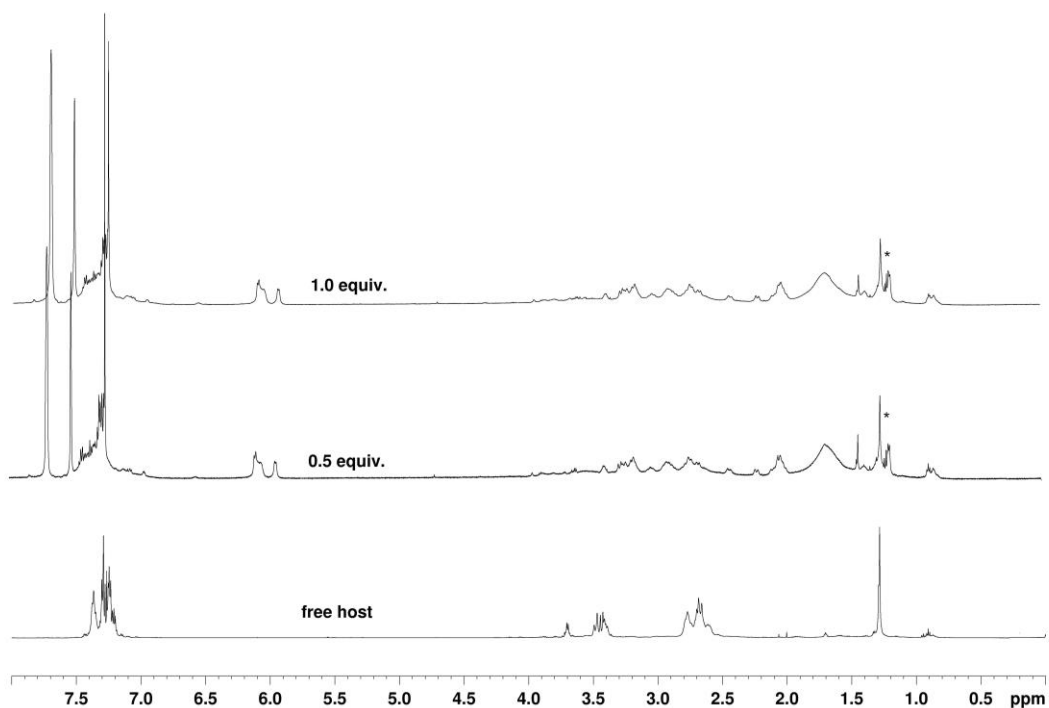

**Figure S2.** Quantitative step-wise addition of NaTFPB to **2**.  $^1\text{H}$  NMR (600 MHz,  $\text{CDCl}_3$ , 298 K, 5.0 mM solution). Grease impurity labelled with an asterisk.

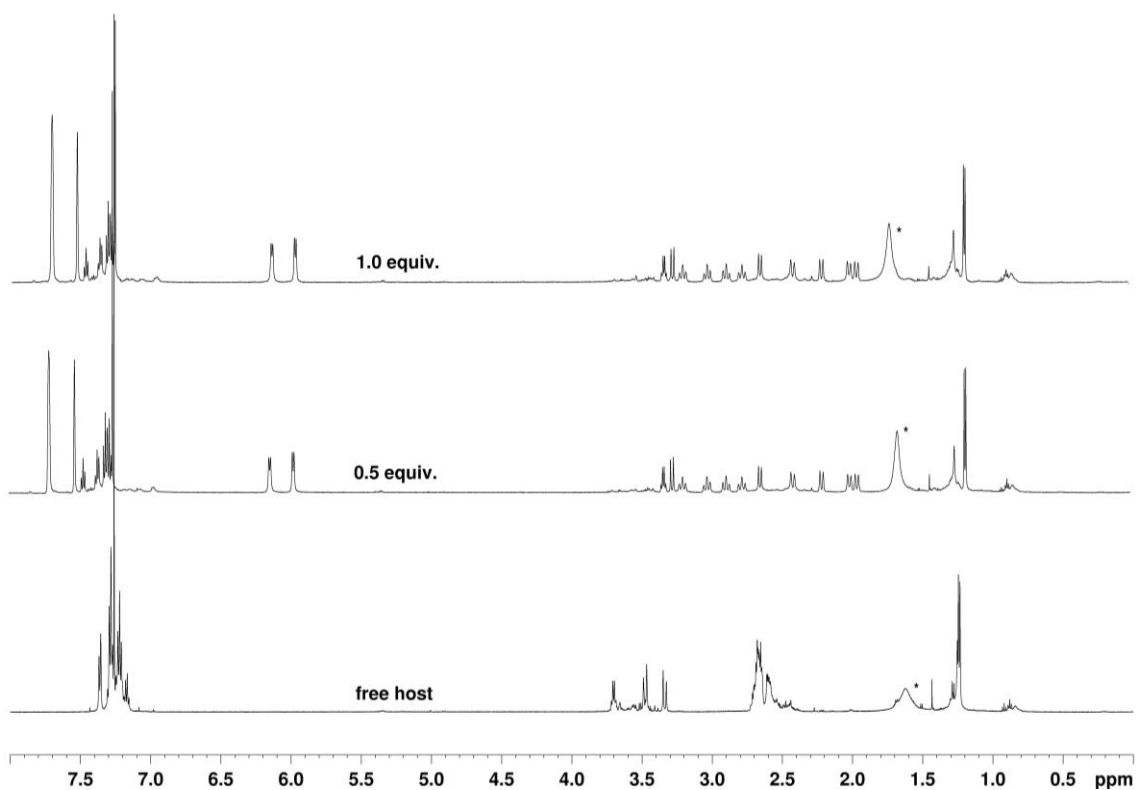

**Figure S3.** Quantitative step-wise addition of NaTFPB to **3**.  $^1\text{H}$  NMR (600 MHz,  $\text{CDCl}_3$ , 298 K, 5.0 mM solution). Water impurity labelled with an asterisk.

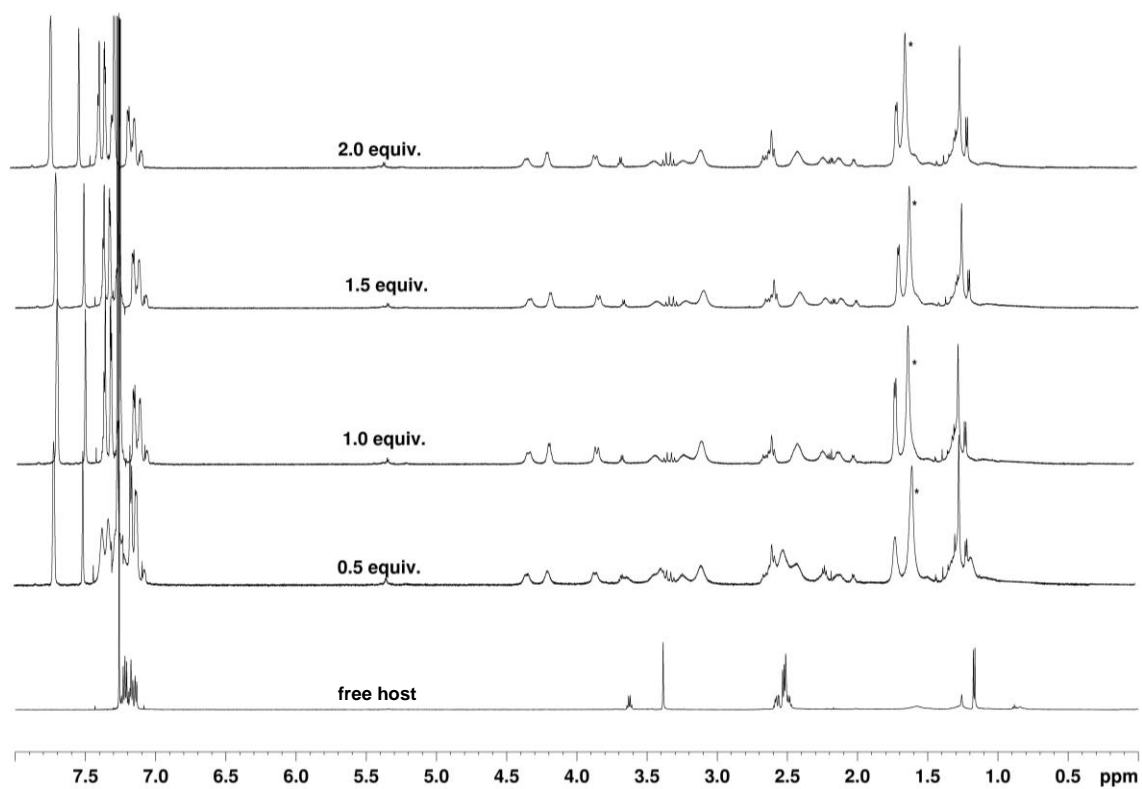

**Figure S4.** Quantitative step-wise addition of NaTFPB to **4**.  $^1\text{H}$  NMR (600 MHz,  $\text{CDCl}_3$ , 298 K, 5.0 mM solution). Water impurities are labelled with an asterisk.

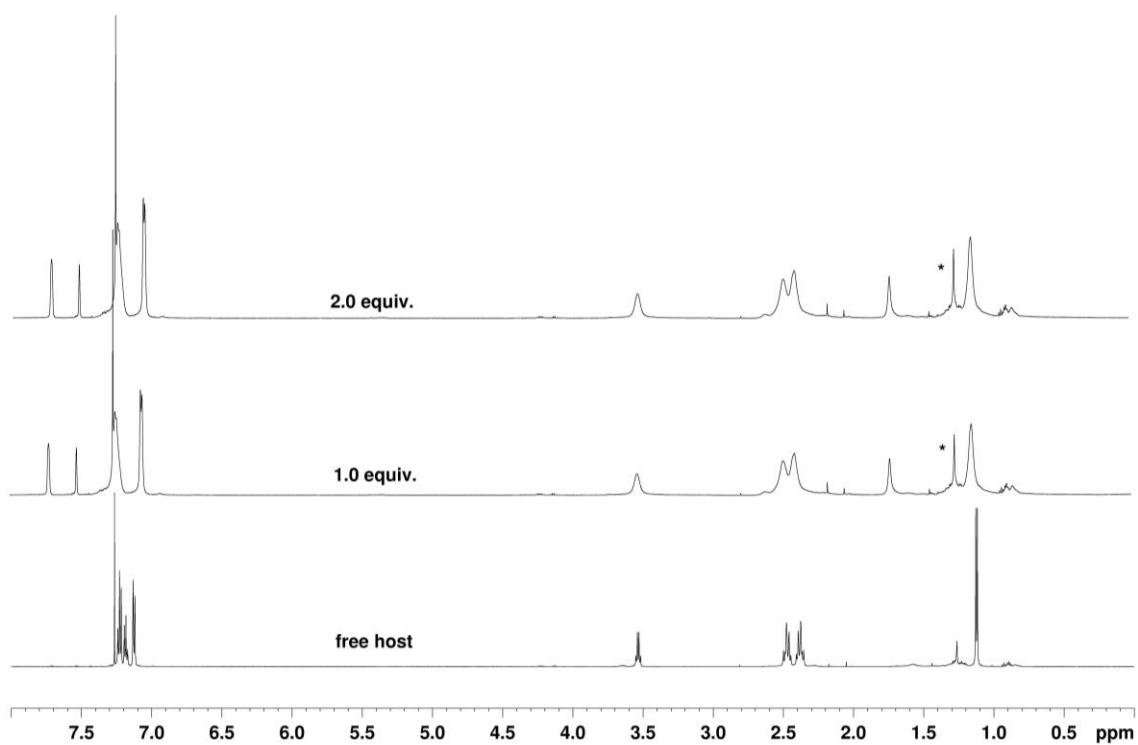

**Figure S5.** Quantitative step-wise addition of NaTFPB to **5**.  $^1\text{H}$  NMR (600 MHz,  $\text{CDCl}_3$ , 298 K, 5.0 mM solution). Water impurities are labelled with an asterisk.

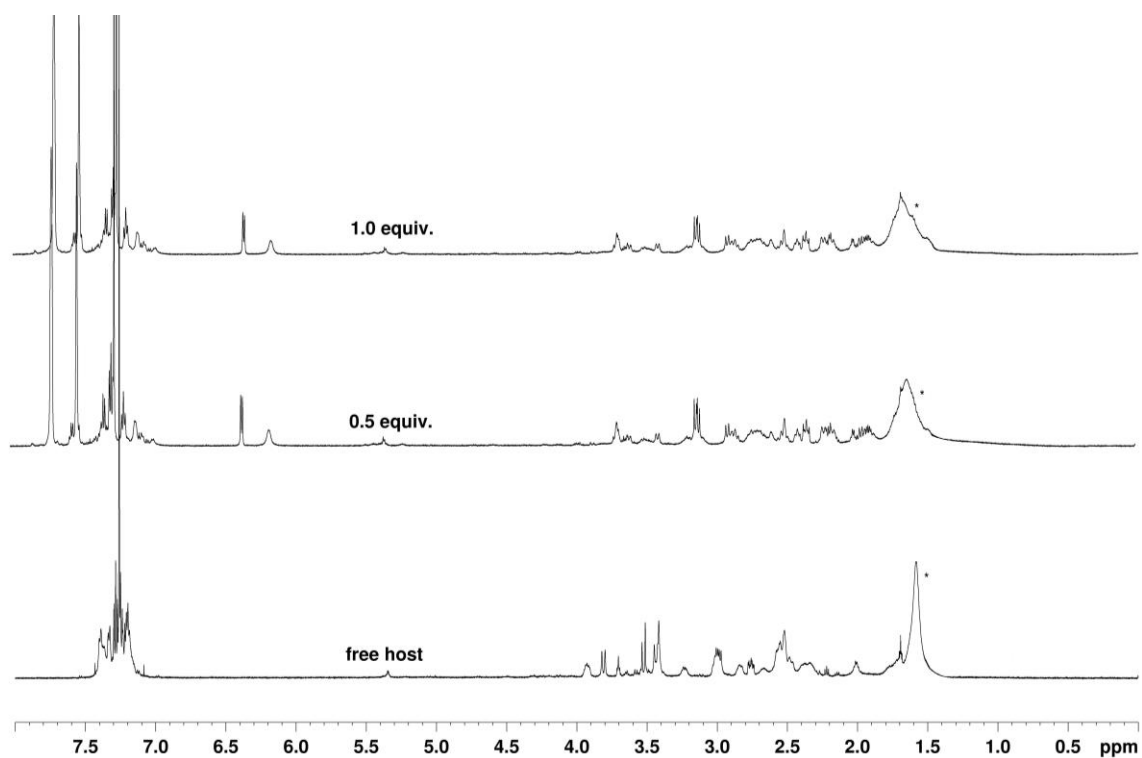

**Figure S6.** Quantitative step-wise addition of NaTFPB to **6**.  $^1\text{H}$  NMR (600 MHz,  $\text{CDCl}_3$ , 298 K, 5.0 mM solution). Water impurities are labelled with an asterisk.

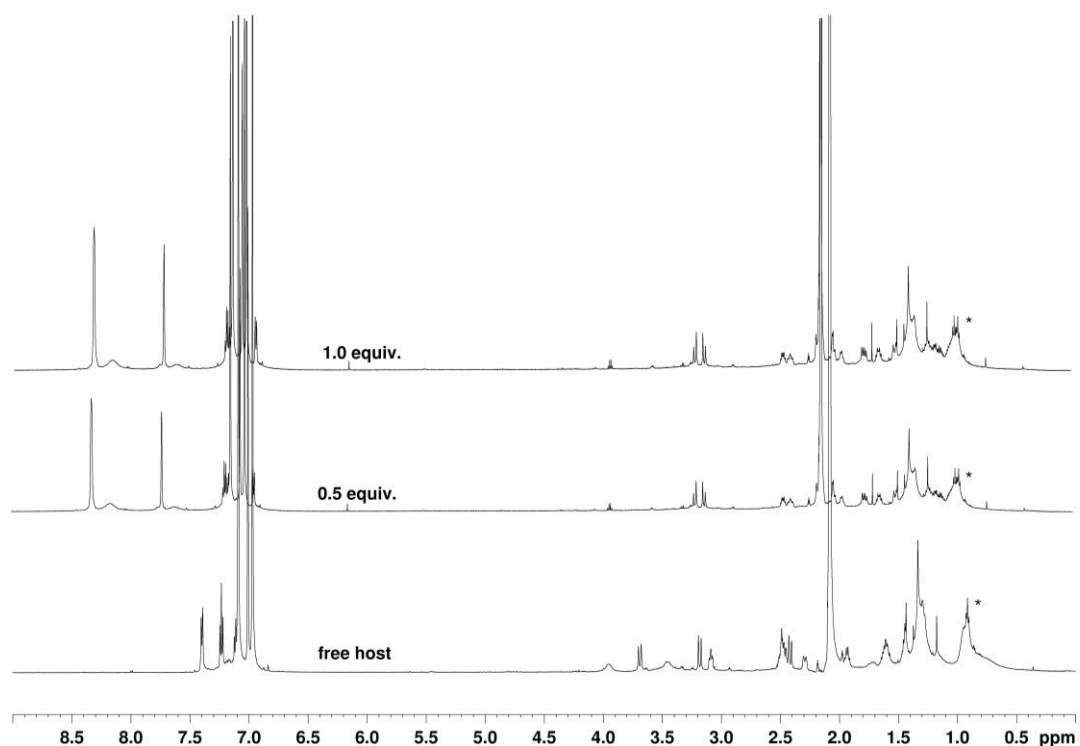

**Figure S7.** Quantitative step-wise addition of NaTFPB to **7**.  $^1\text{H}$  NMR (600 MHz,  $\text{C}_6\text{D}_5\text{CD}_3$ , 298 K, 5.0 mM solution). Grease impurity labelled with an asterisk.

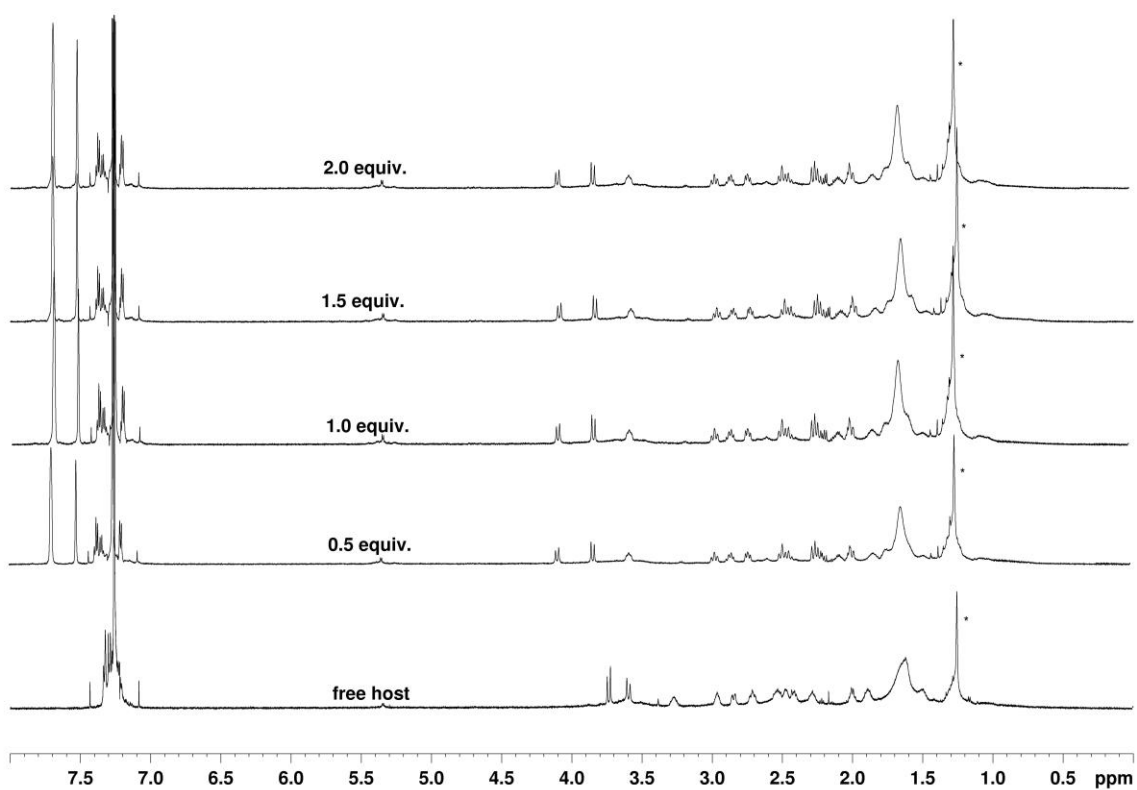

**Figure S8.** Quantitative step-wise addition of NaTFPB to **8**.  $^1\text{H}$  NMR (600 MHz,  $\text{CDCl}_3$ , 298 K, 5.0 mM solution). Grease impurities are labelled with an asterisk.

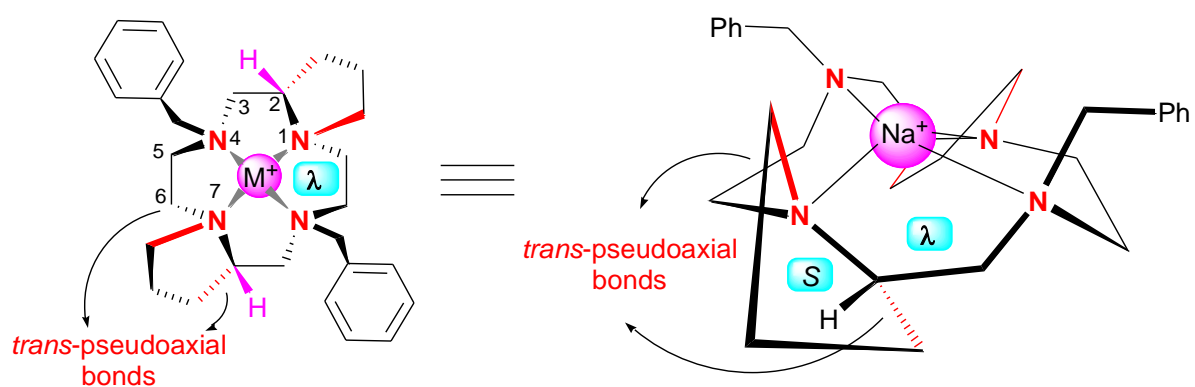

**Figure S9.** Schematic structures of geometrically implausible (1*S*,2*S*,4*R*,7*S*,8*S*,10*R*)-(λλλλ)-[**7**-Na]<sup>+</sup> model (top and side view).



## 2.0 HPLC Chromatograms

Conditions: 5 → 100% A in 30 min (A, 0.1% TFA in acetonitrile, B, 0.1% TFA in water);  
flow: 1 mL min<sup>-1</sup>, 220 nm.

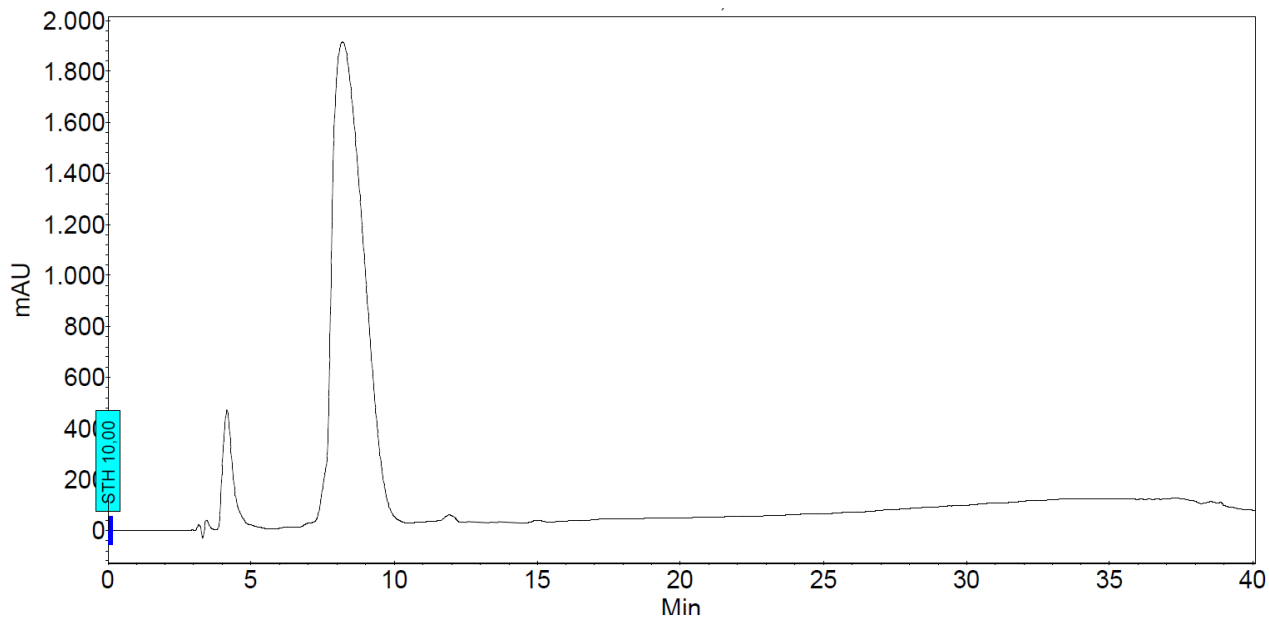

Figure S10. HPLC analysis of **16**

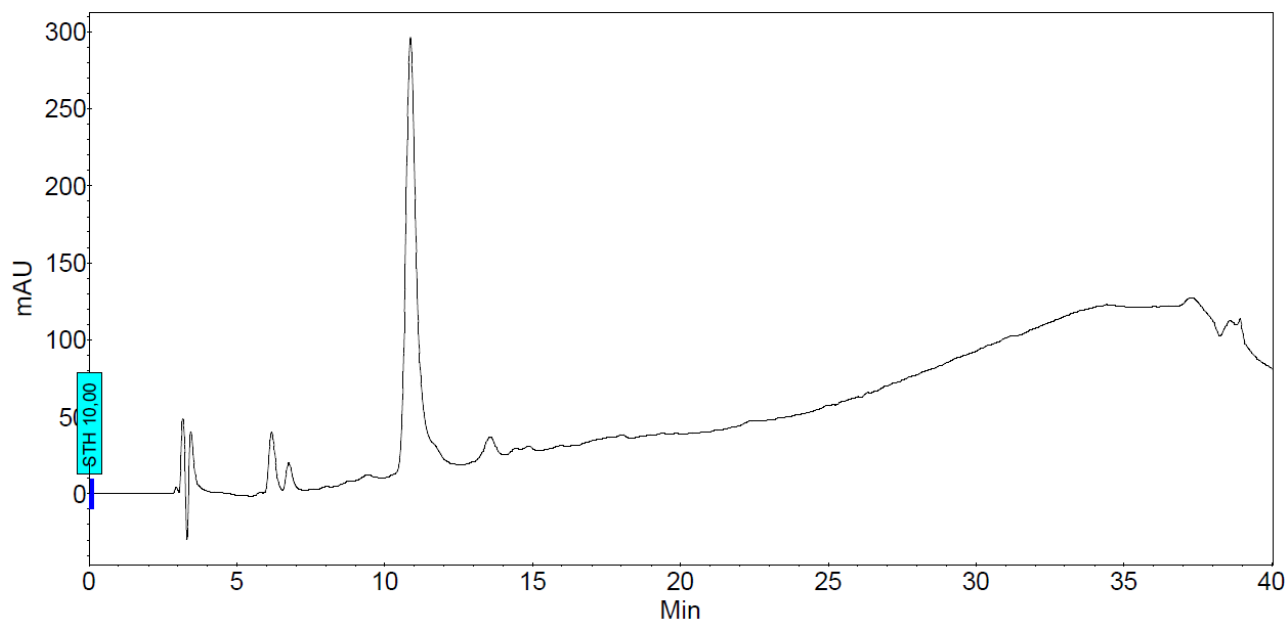

Figure S11. HPLC analysis of **13**

### 3.0 UV-Vis Spectra (Figures S12-S18)

All UV-Vis spectra were acquired in acetonitrile,  $C = 0.003 \text{ mg mL}^{-1}$

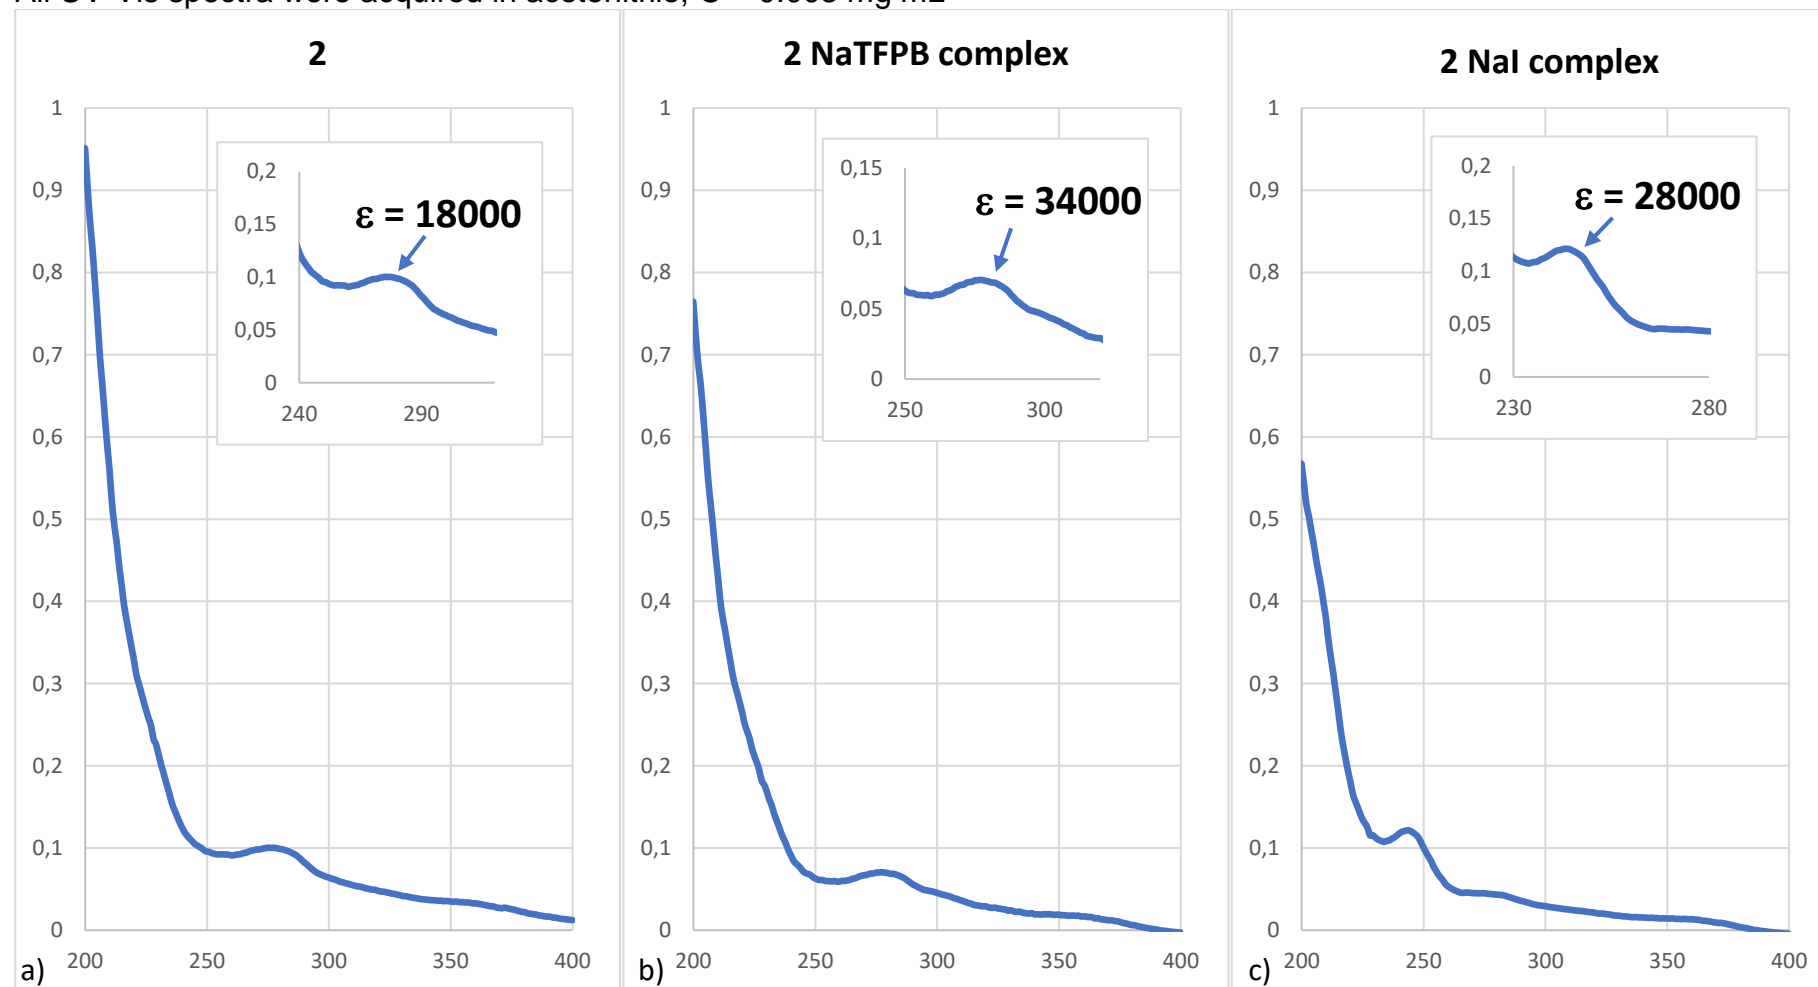

**Figure S12.** UV-Vis spectra of a) **2** ( $\lambda_{\text{max}}$  275 nm,  $\pi \rightarrow \pi^*$ ); b) **2** as NaTFPB complex ( $\lambda_{\text{max}}$  277 nm,  $\pi \rightarrow \pi^*$ ); c) **2** as NaI complex ( $\lambda_{\text{max}}$  244 nm,  $\pi \rightarrow \pi^*$ ).

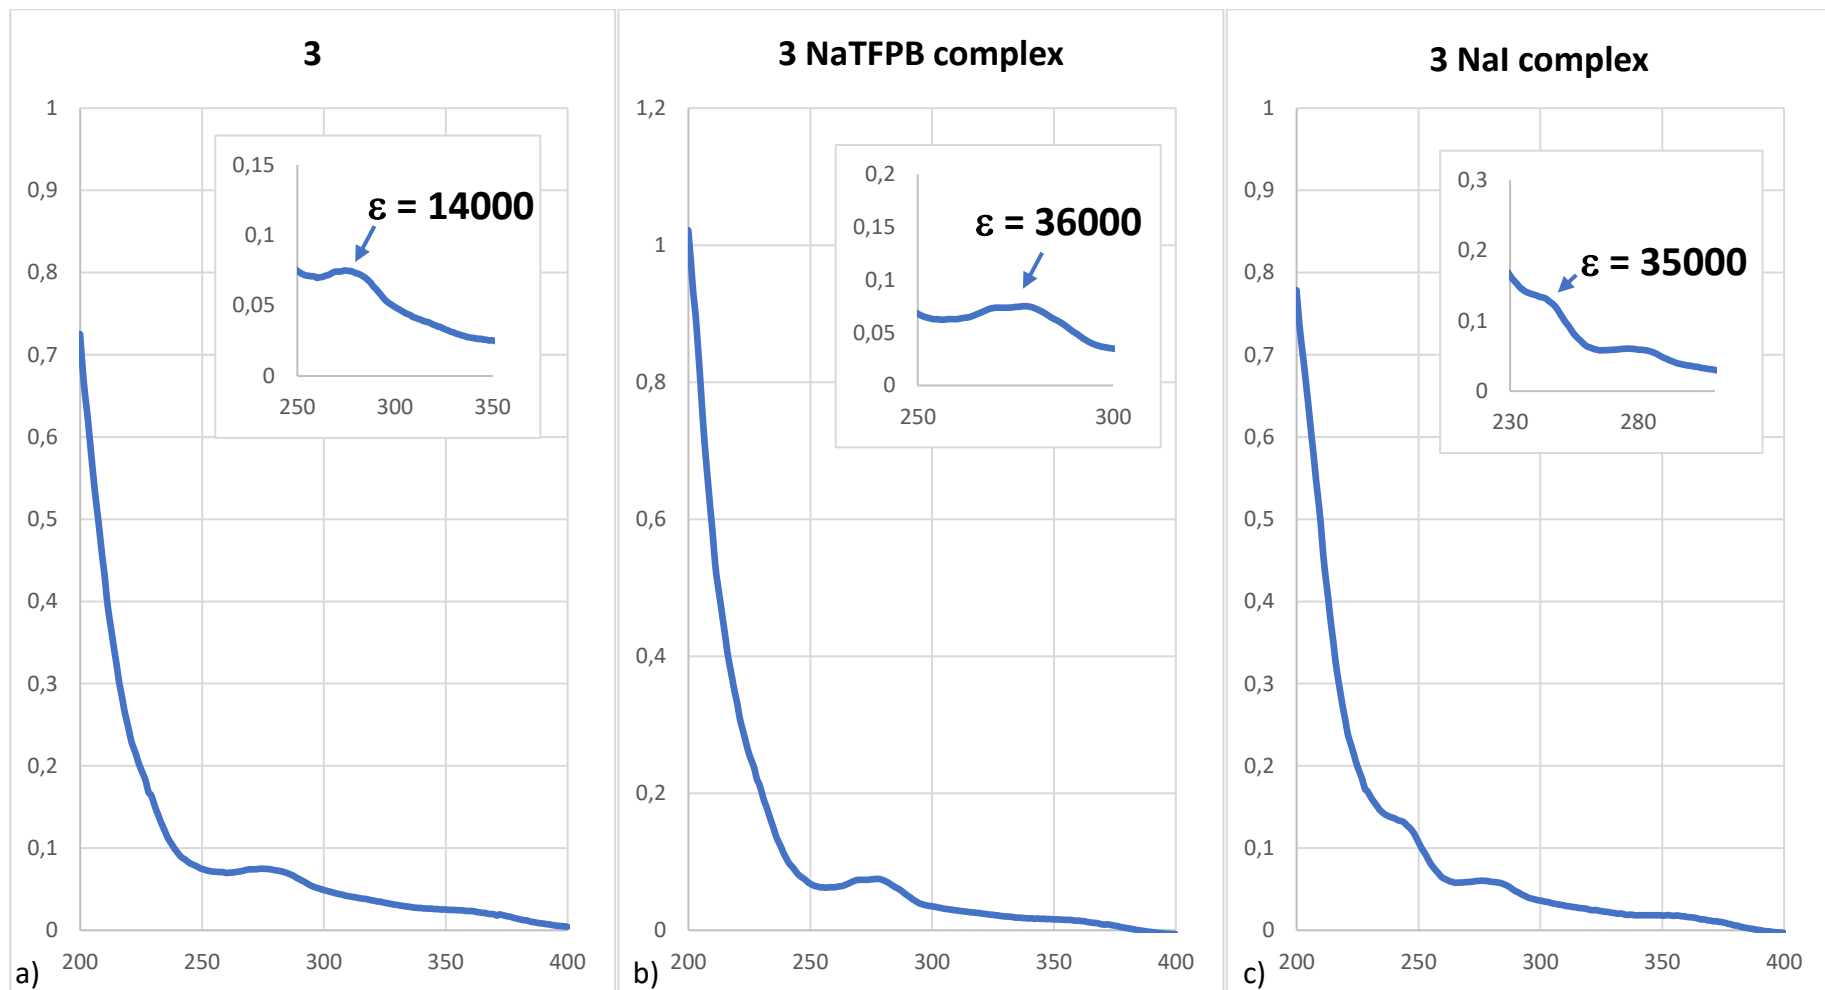

**Figure S13.** UV-Vis spectra of a) **3** ( $\lambda_{\text{max}}$  274 nm,  $\pi \rightarrow \pi^*$ ); b) **3** as NaTFPB complex ( $\lambda_{\text{max}}$  277 nm,  $\pi \rightarrow \pi^*$ ); c) **3** as NaI complex ( $\lambda_{\text{max}}$  234 nm,  $\pi \rightarrow \pi^*$ ).

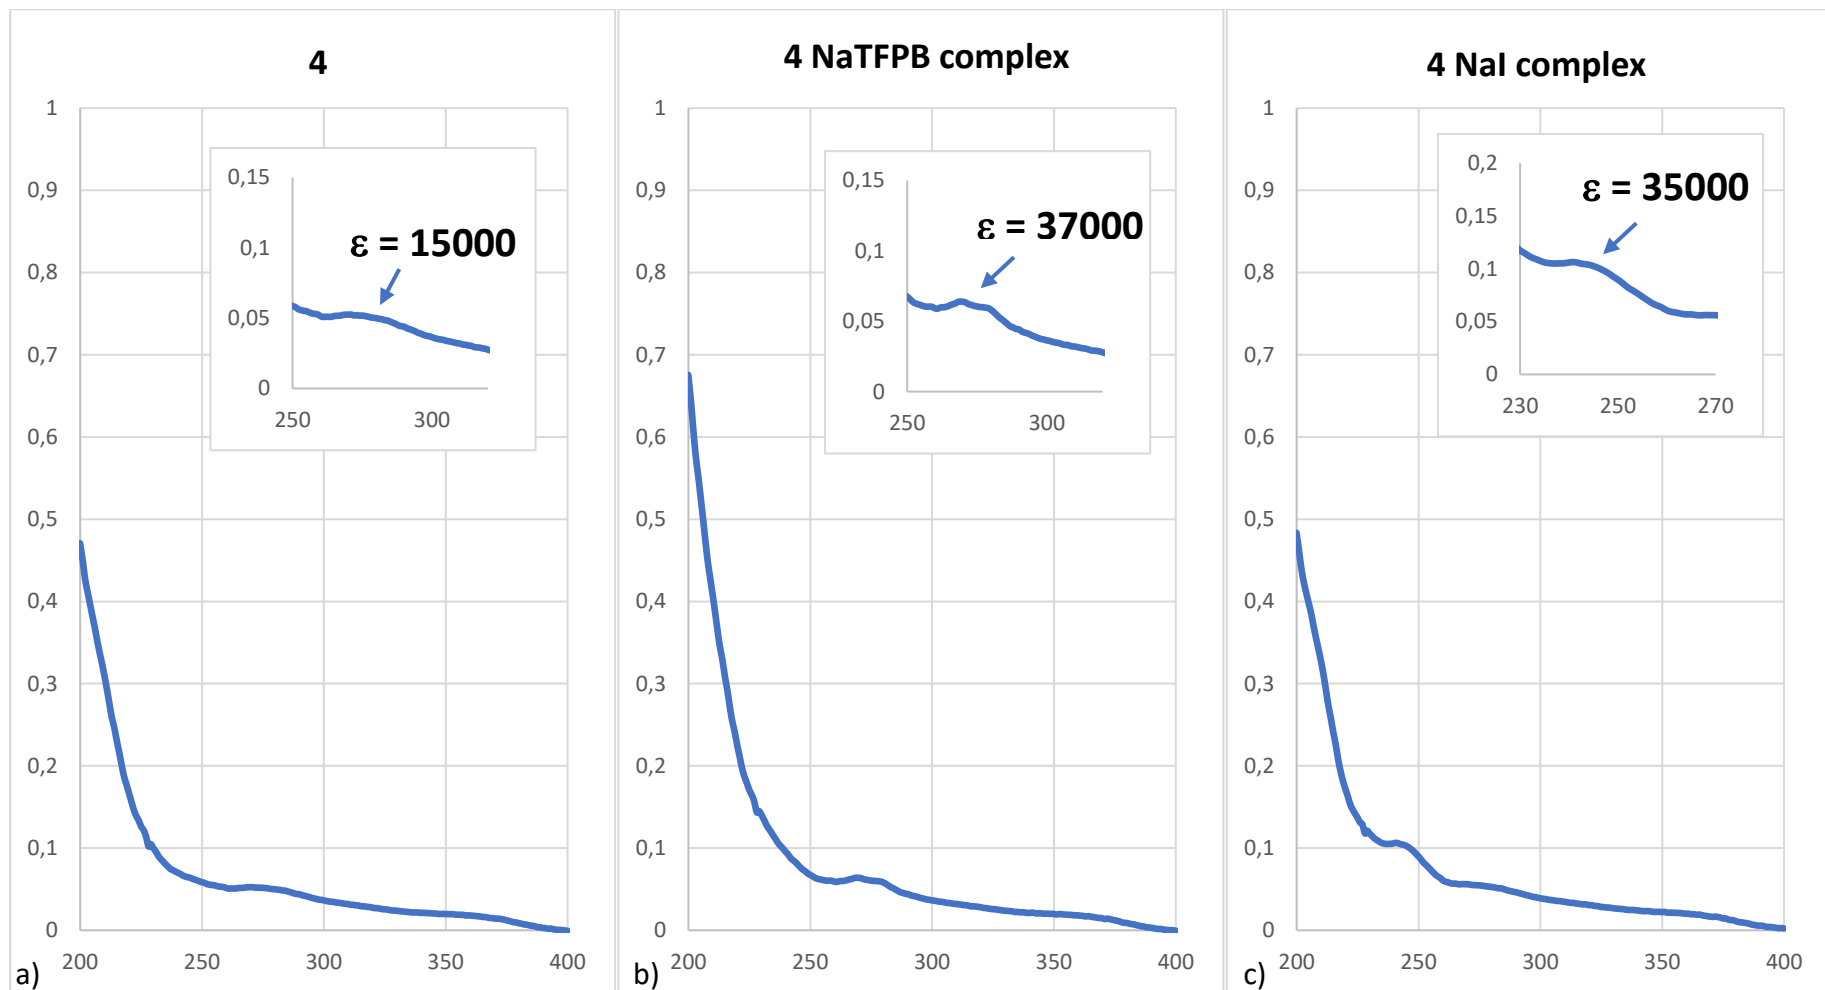

**Figure S14.** UV-Vis spectra of a) **4** ( $\lambda_{\text{max}}$  271 nm,  $\pi \rightarrow \pi^*$ ); b) **4** as NaTFPB complex ( $\lambda_{\text{max}}$  269 nm,  $\pi \rightarrow \pi^*$ ); c) **4** as NaI complex ( $\lambda_{\text{max}}$  241 nm,  $\pi \rightarrow \pi^*$ ).

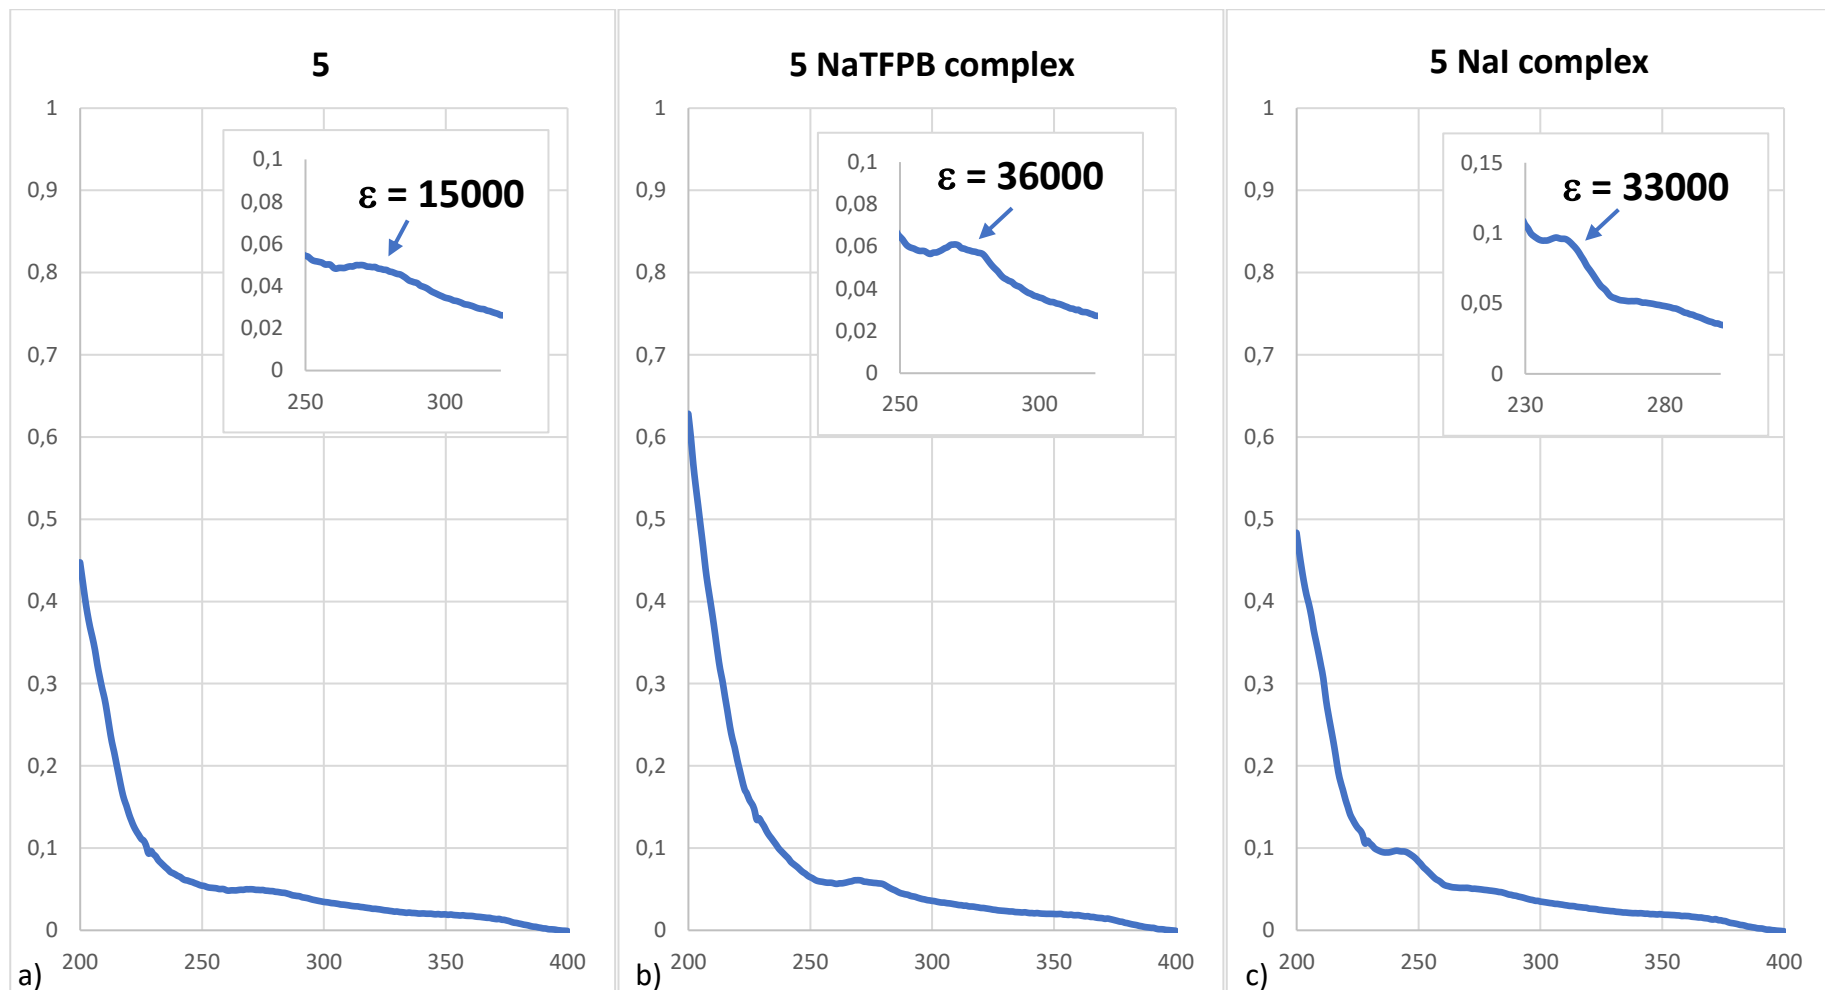

**Figure S15.** UV-Vis spectra of a) **5** ( $\lambda_{\text{max}}$  270 nm,  $\pi \rightarrow \pi^*$ ); b) **5** as NaTFPB complex ( $\lambda_{\text{max}}$  270 nm,  $\pi \rightarrow \pi^*$ ); c) **5** as NaI complex ( $\lambda_{\text{max}}$  241 nm,  $\pi \rightarrow \pi^*$ ).

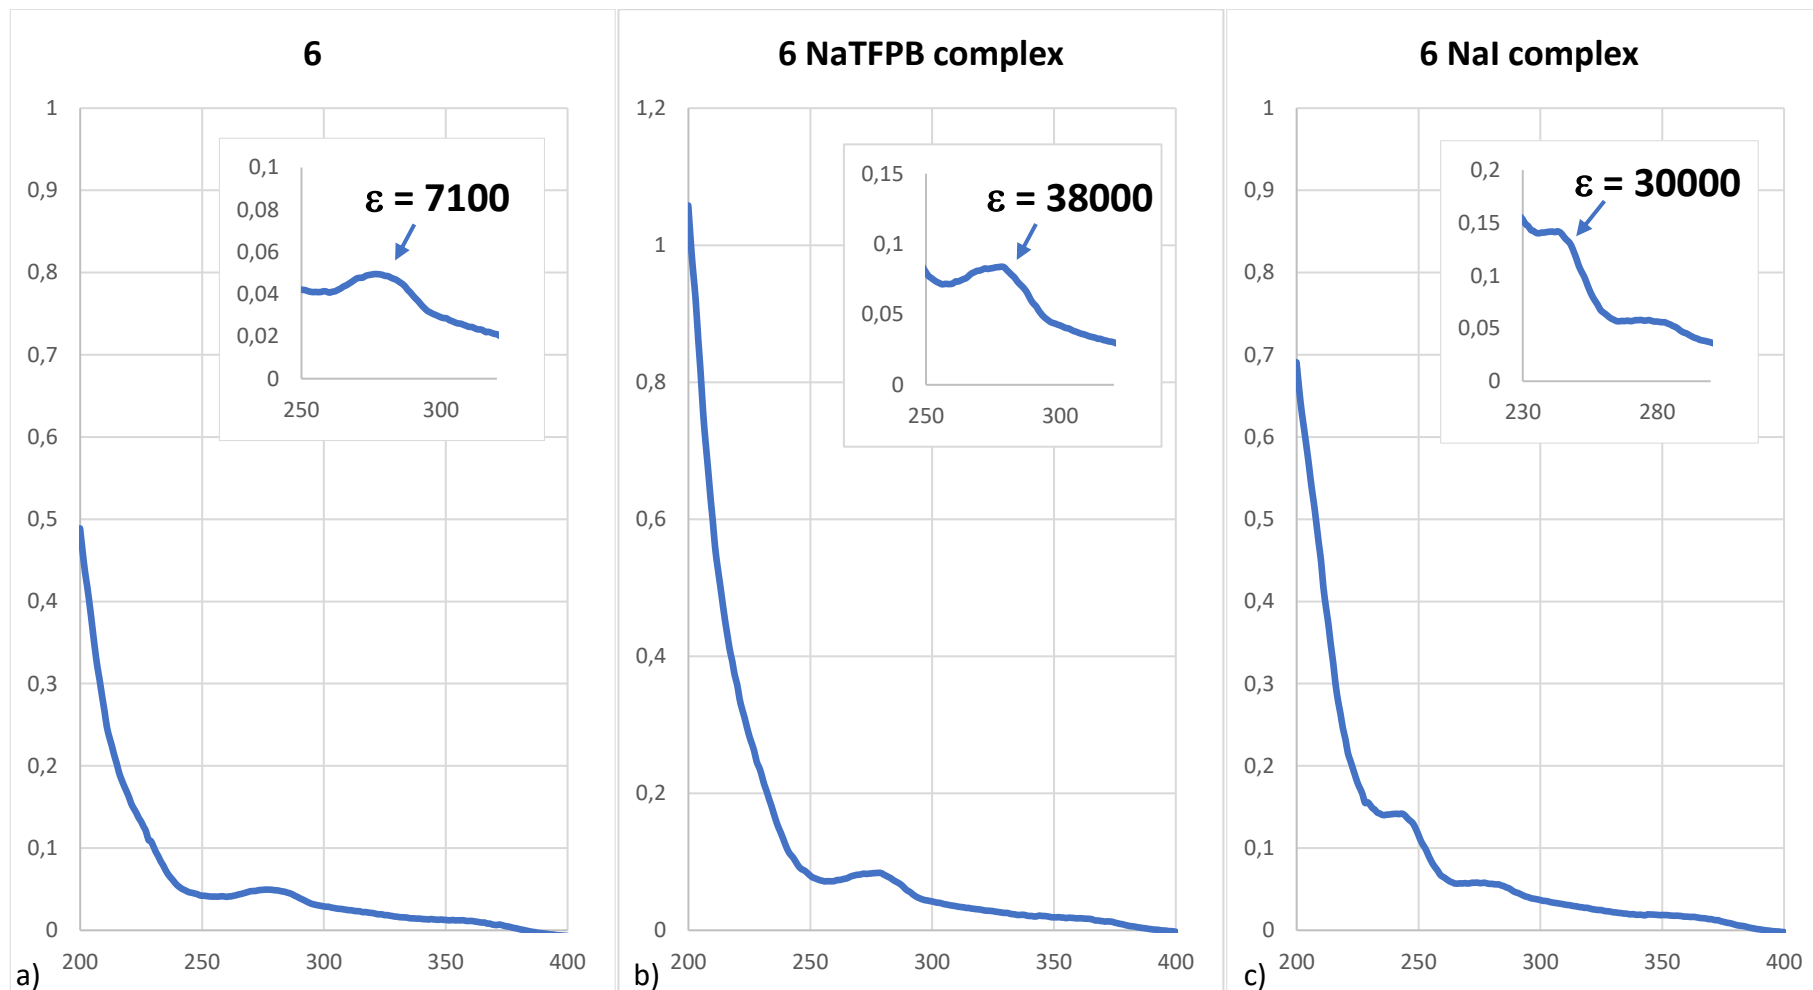

**Figure S16.** UV-Vis spectra of a) **6** ( $\lambda_{\text{max}}$  277 nm,  $\pi \rightarrow \pi^*$ ); b) **6** as NaTFPB complex ( $\lambda_{\text{max}}$  278 nm,  $\pi \rightarrow \pi^*$ ); c) **6** as NaI complex ( $\lambda_{\text{max}}$  243 nm,  $\pi \rightarrow \pi^*$ ).

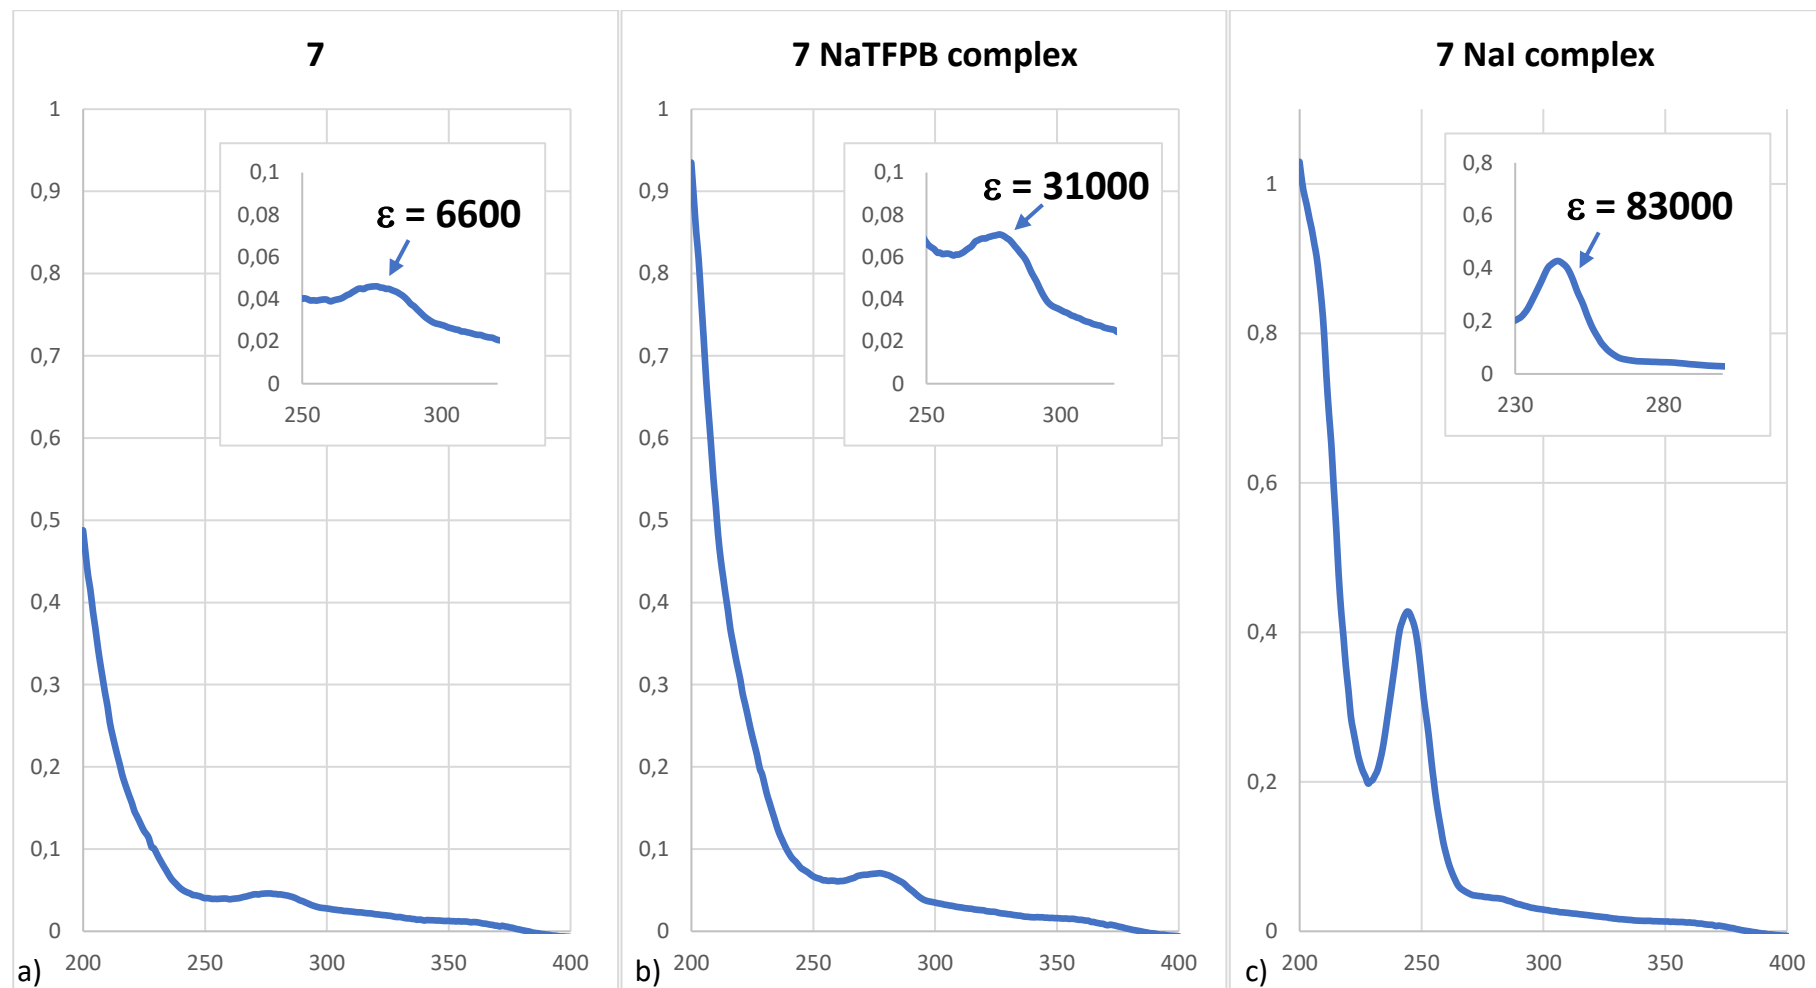

**Figure S17.** UV-Vis spectra of a) **7** ( $\lambda_{\max}$  276 nm,  $\pi \rightarrow \pi^*$ ); b) **7** as NaTFPB complex ( $\lambda_{\max}$  277 nm,  $\pi \rightarrow \pi^*$ ); c) **7** as NaI complex ( $\lambda_{\max}$  244 nm,  $\pi \rightarrow \pi^*$ ).

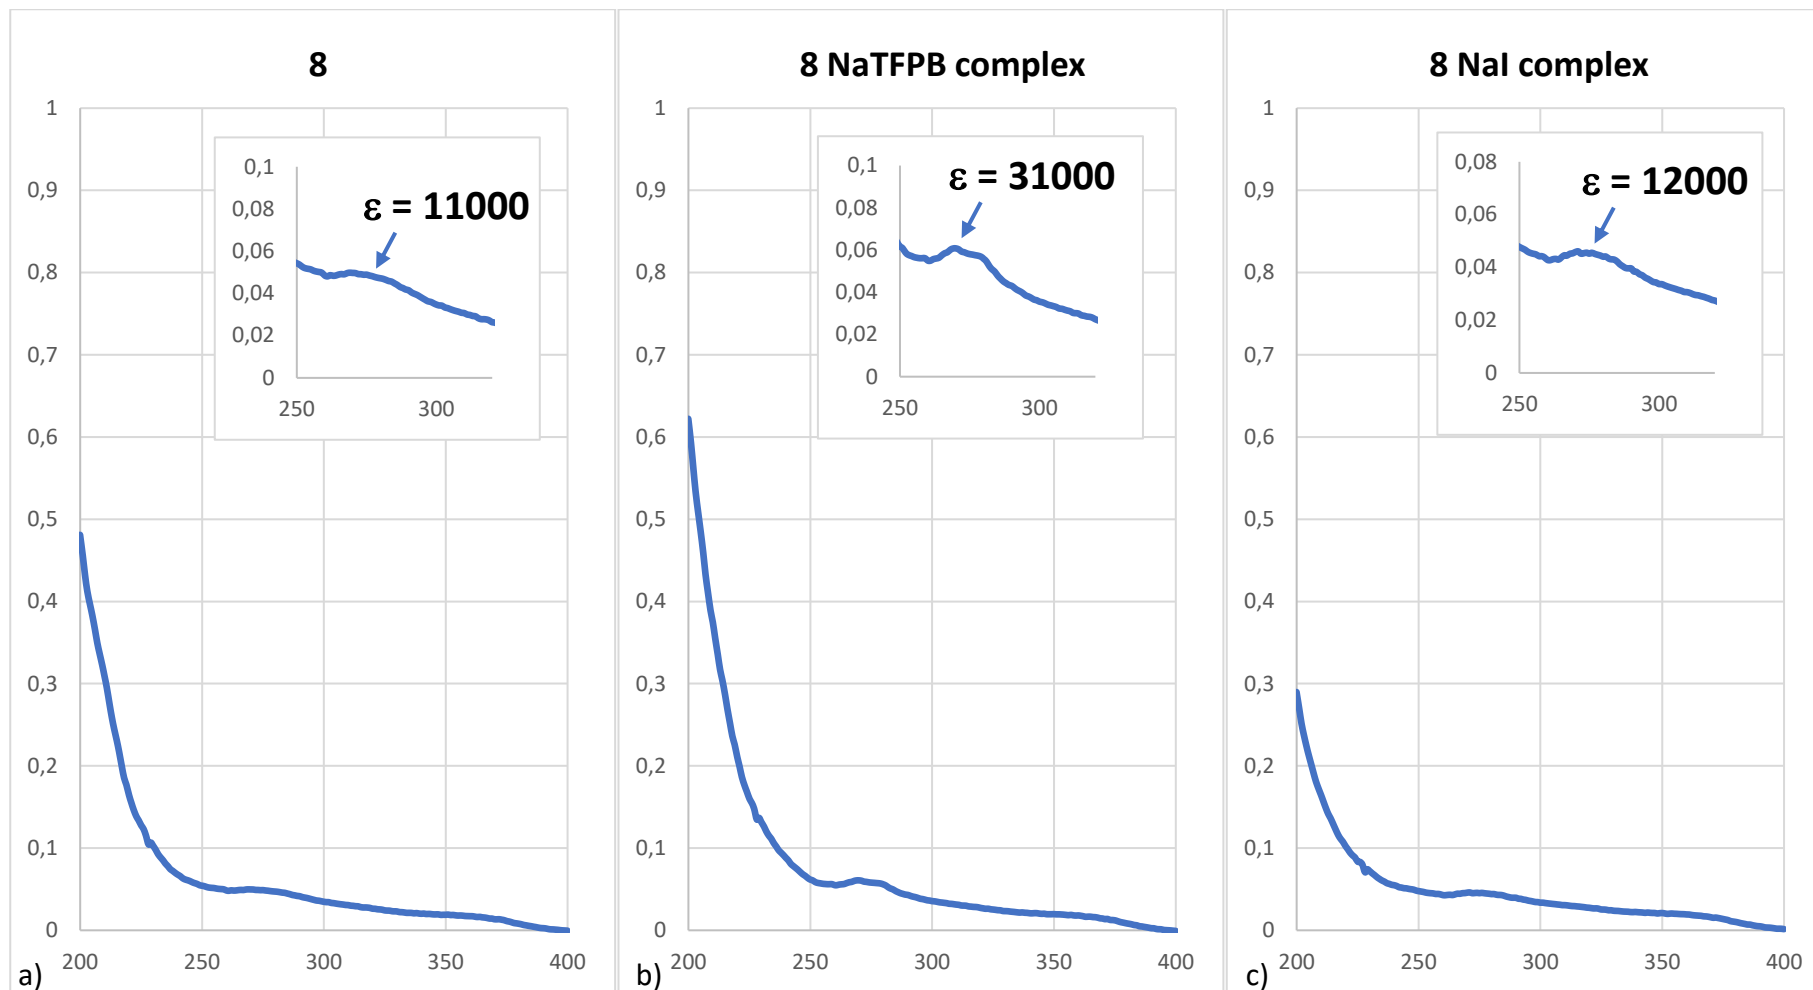

**Figure S18.** UV-Vis spectra of a) **8** ( $\lambda_{\max}$  269 nm,  $\pi \rightarrow \pi^*$ ); b) **8** as NaTFPB complex ( $\lambda_{\max}$  270 nm,  $\pi \rightarrow \pi^*$ ); c) **8** as NaI complex ( $\lambda_{\max}$  271 nm,  $\pi \rightarrow \pi^*$ ).



#### 4.0 CD spectra (Figures S19-S26)

The spectra of the iodide salts were recorded in order to eliminate the possible influence of the large polyaromatic TFBP counterion.

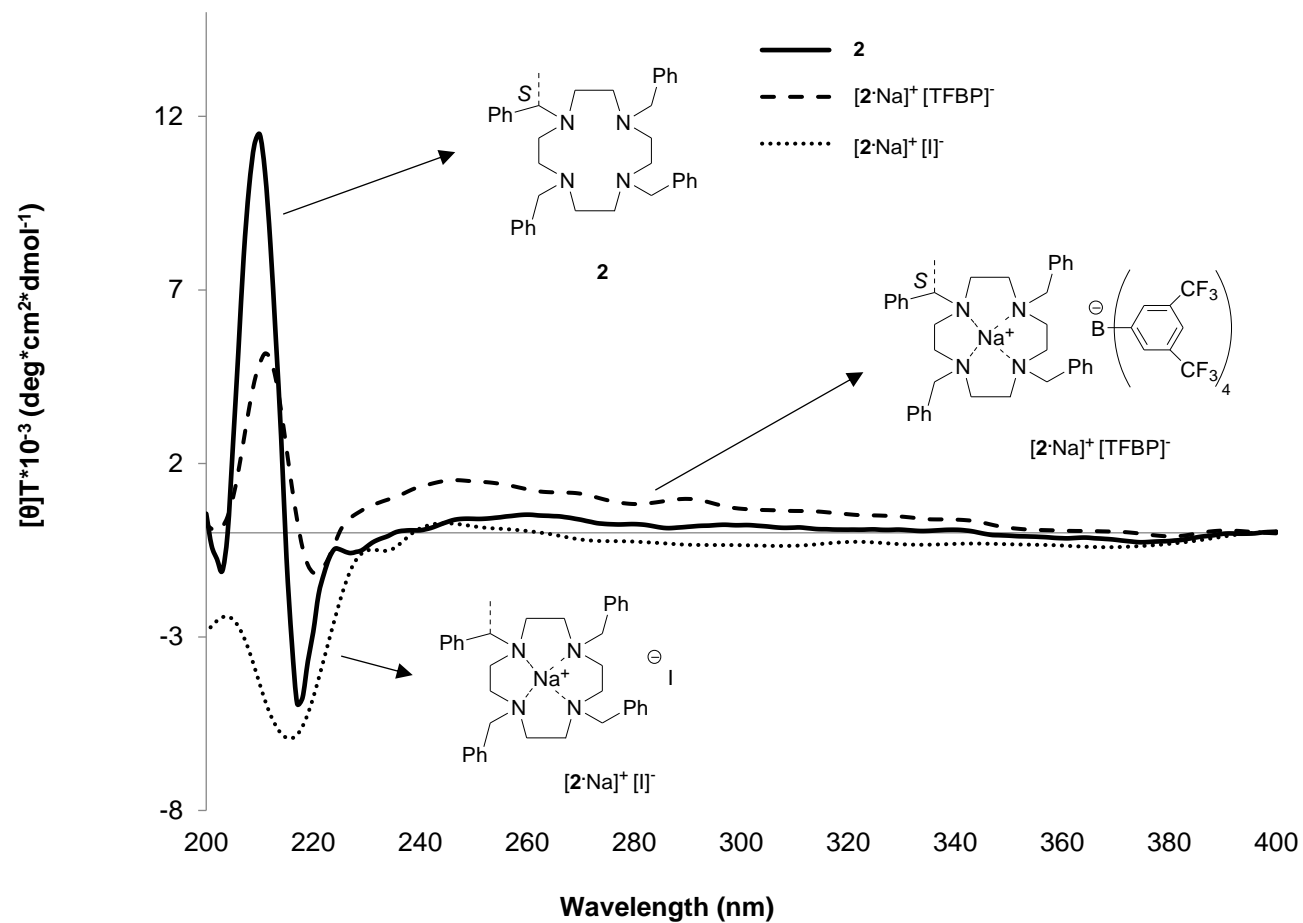

**Figure S19.** CD spectra of **2**, **2** in the presence of 1 equivalent NaTFBP, and **2** in the presence of 1 equivalent of NaI. Solvent: acetonitrile.

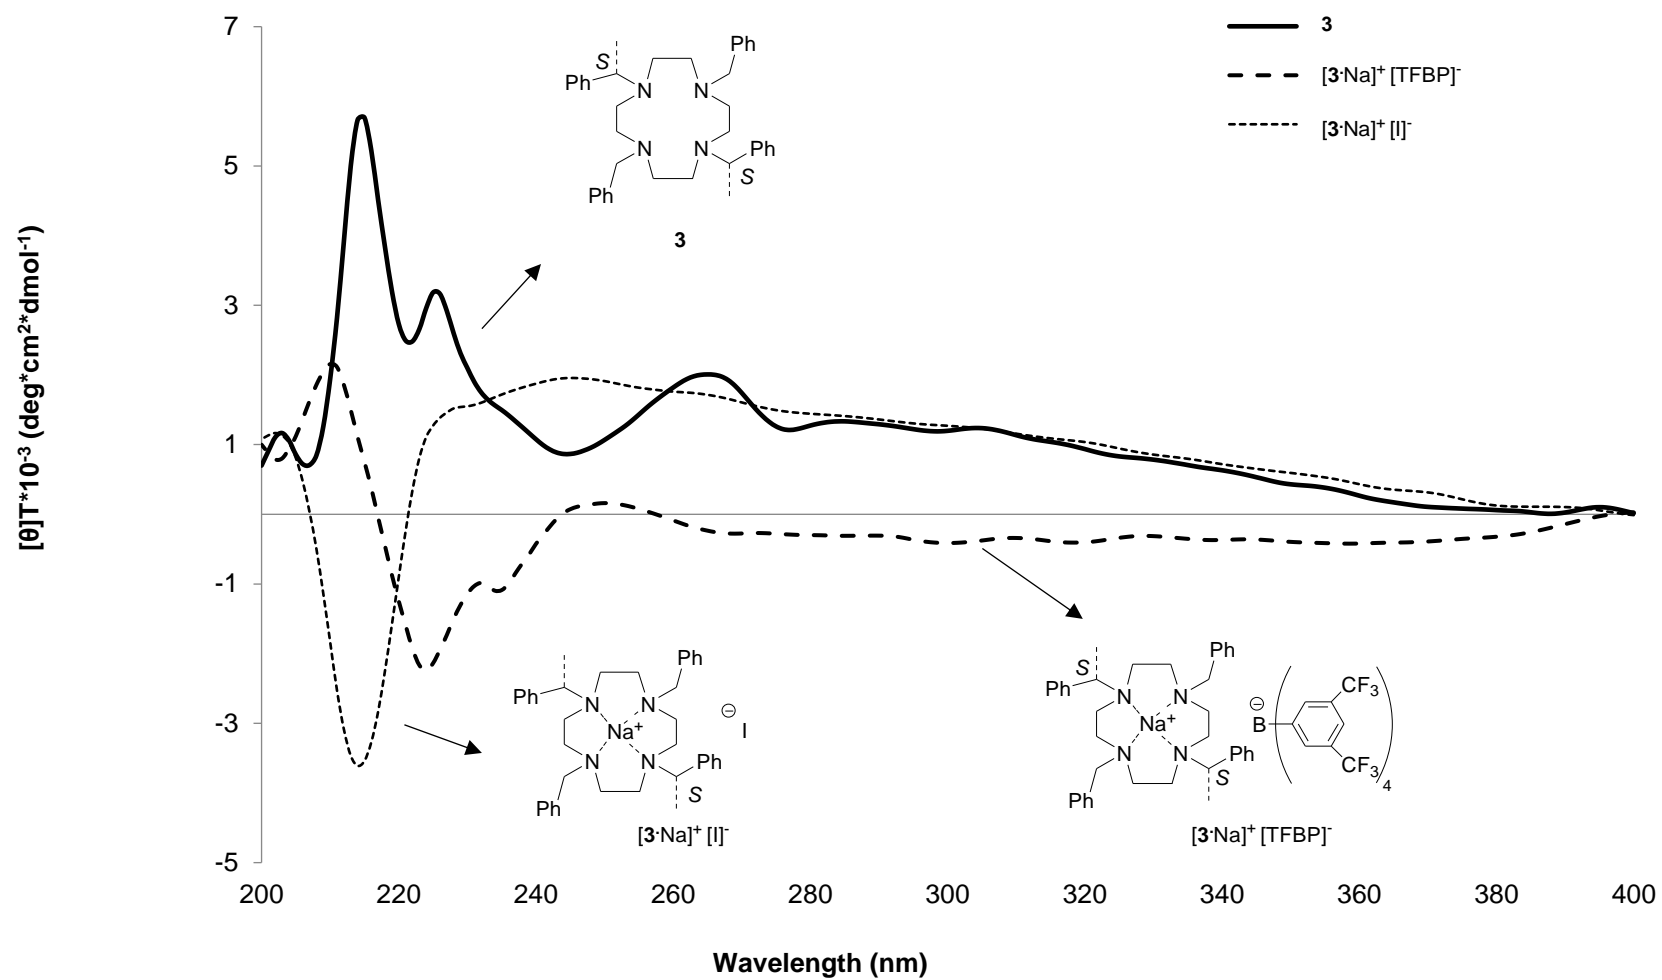

**Figure S20.** CD spectra of **3**, **3** in the presence of 1 equivalent NaTFPB, and **3** in the presence of 1 equivalent of NaI. Solvent: acetonitrile.

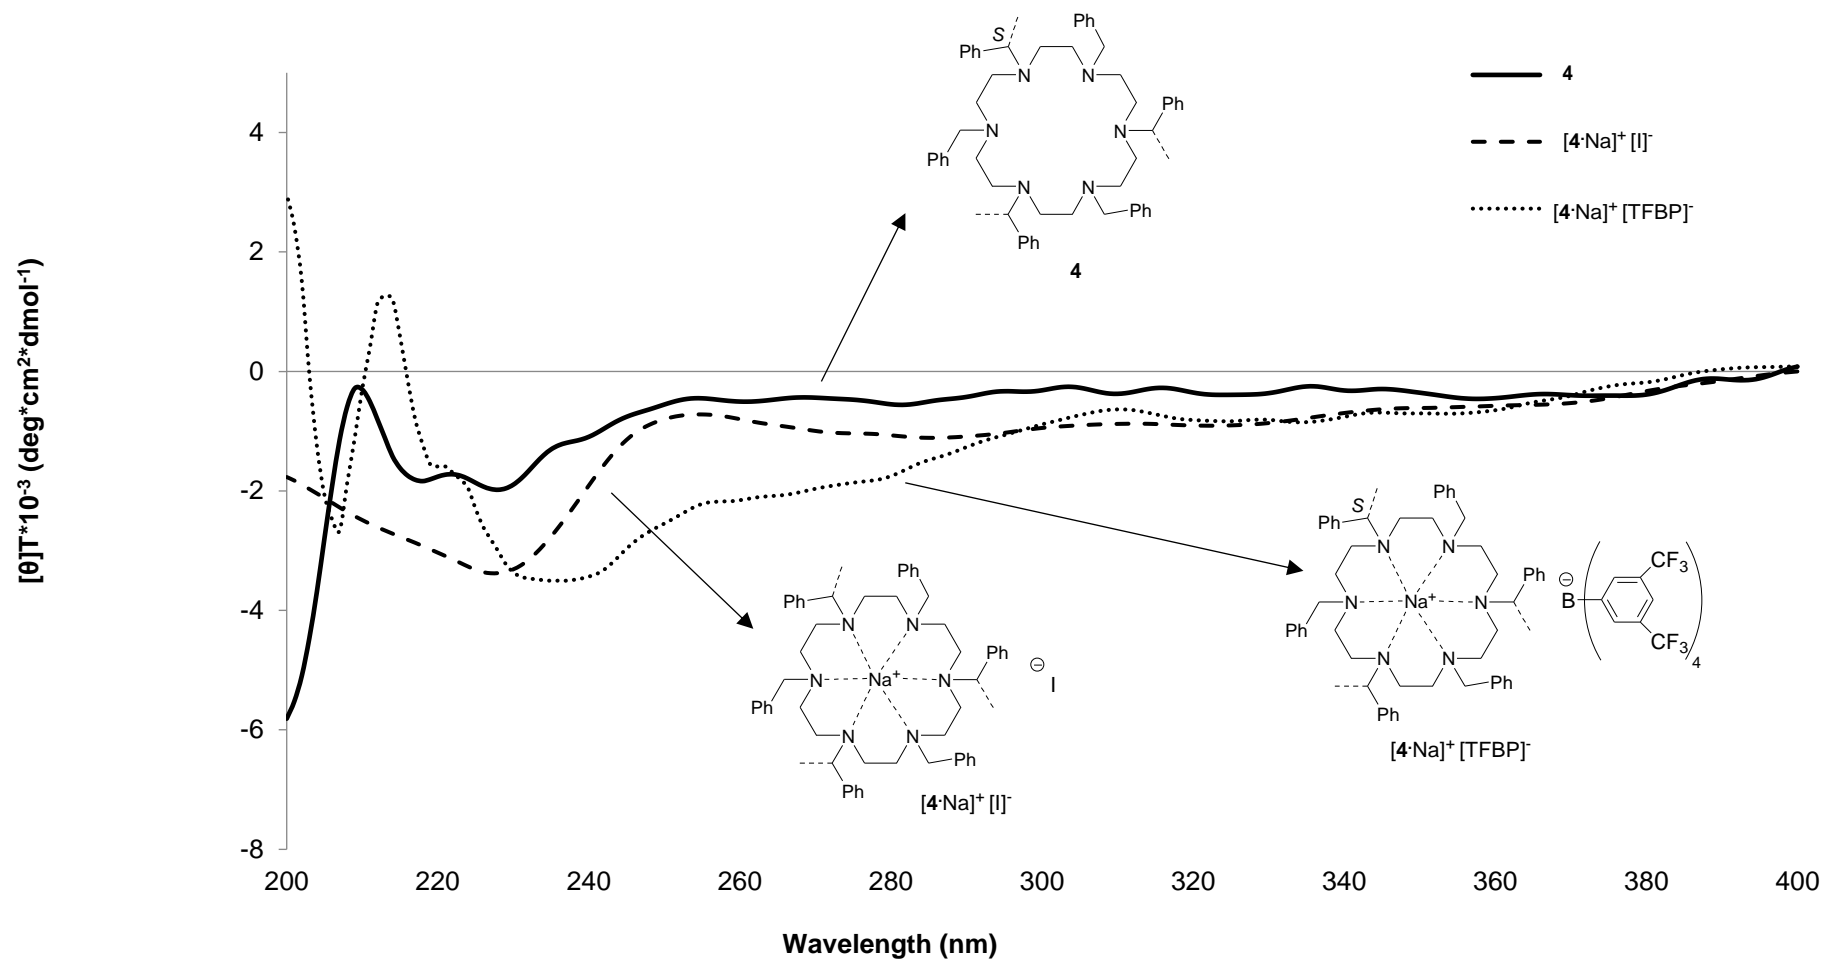

**Figure S21.** CD spectra of **4**, **4** in the presence of 1 equivalent NaIFPB, and **4** in the presence of 1 equivalent of NaI. Solvent: acetonitrile.

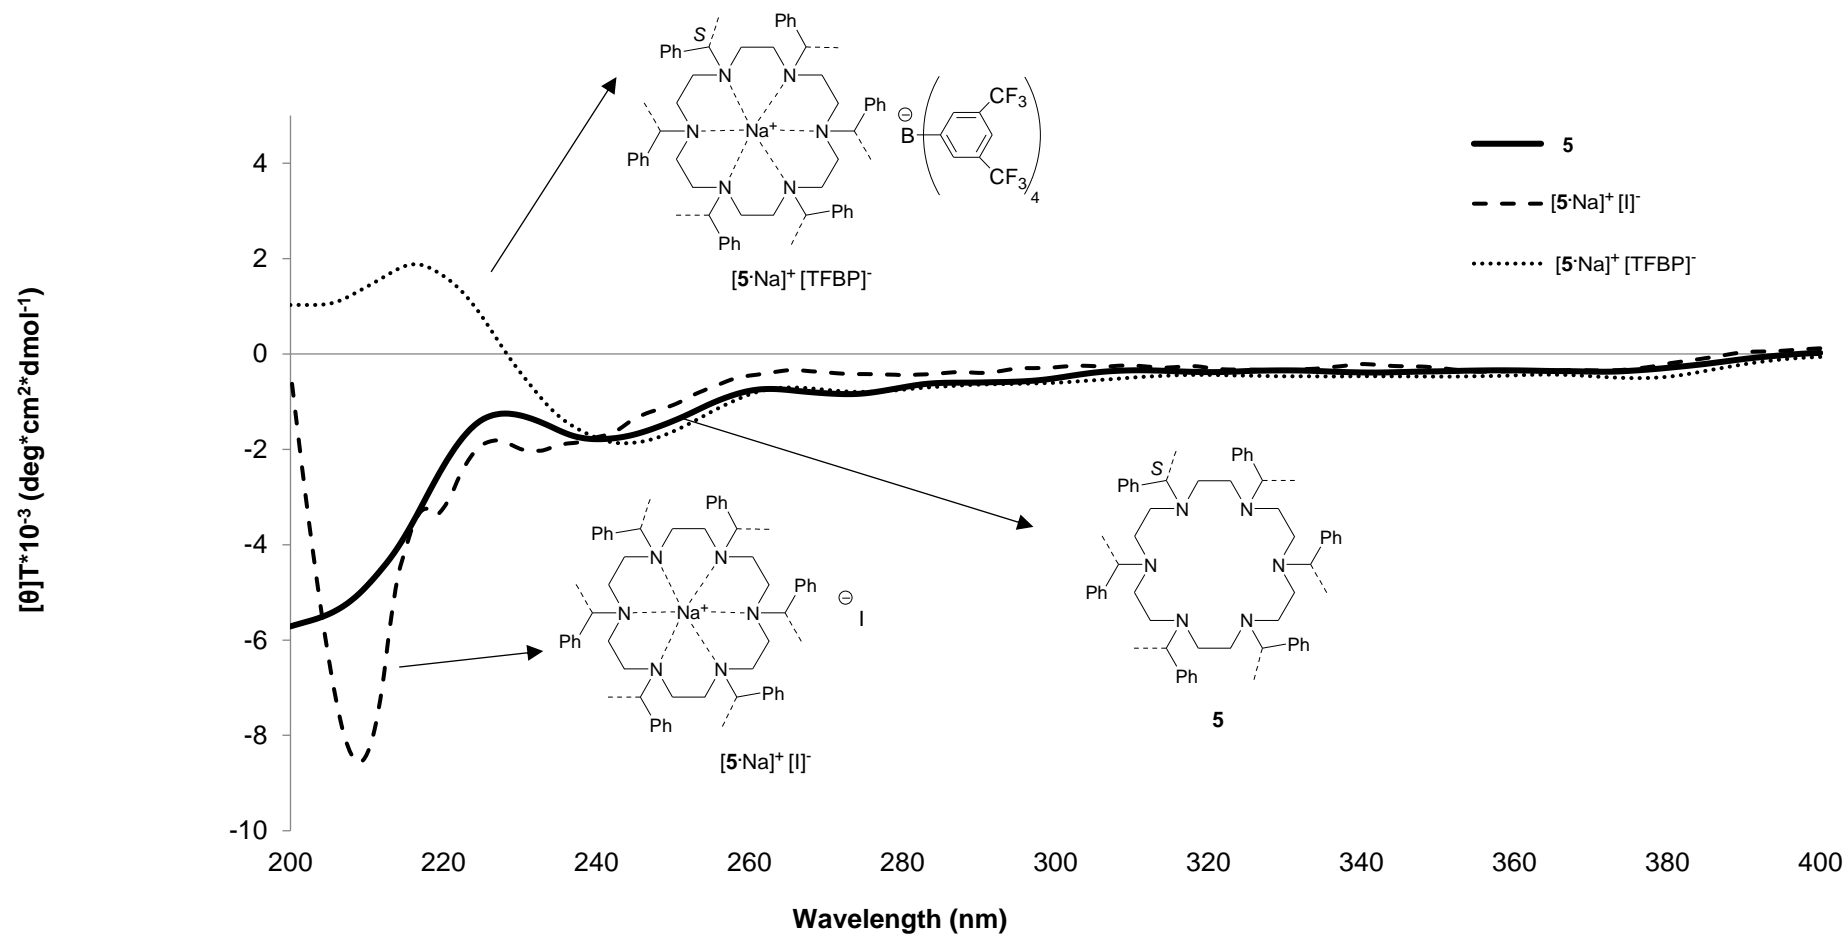

**Figure S22.** CD spectra of **5**, **5** in the presence of 1 equivalent NaTFPB, and **5** in the presence of 1 equivalent of NaI. Solvent: acetonitrile.

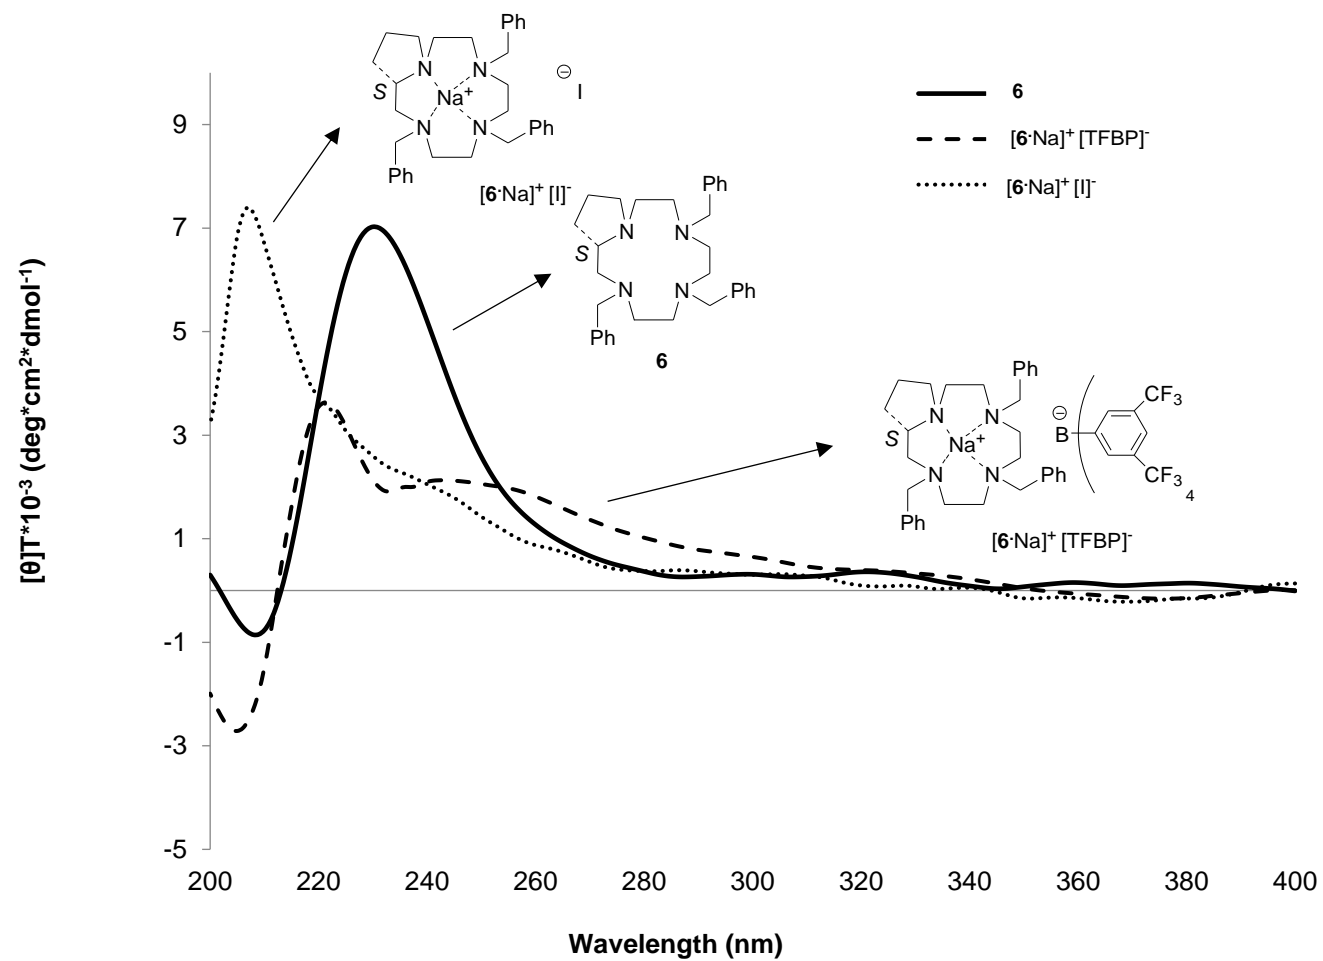

**Figure S23.** CD spectra of **6**, **6** in the presence of 1 equivalent NaTFPB, and **6** in the presence of 1 equivalent of NaI. Solvent: acetonitrile.

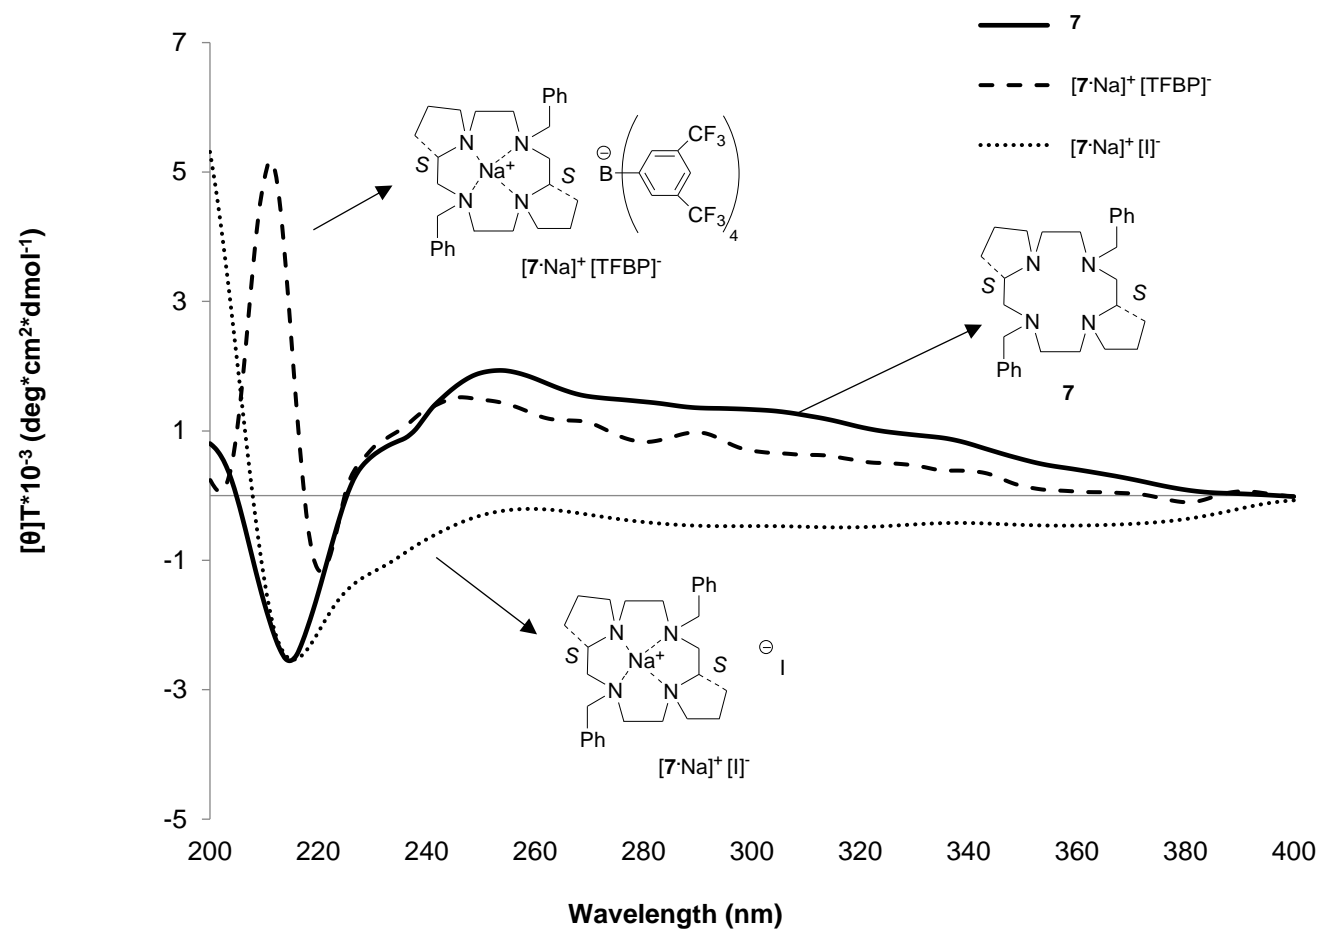

Figure S24. CD spectra of **7**, **7** in the presence of 1 equivalent NaTFPB, and **7** in the presence of 1 equivalent of NaI. Solvent: acetonitrile.

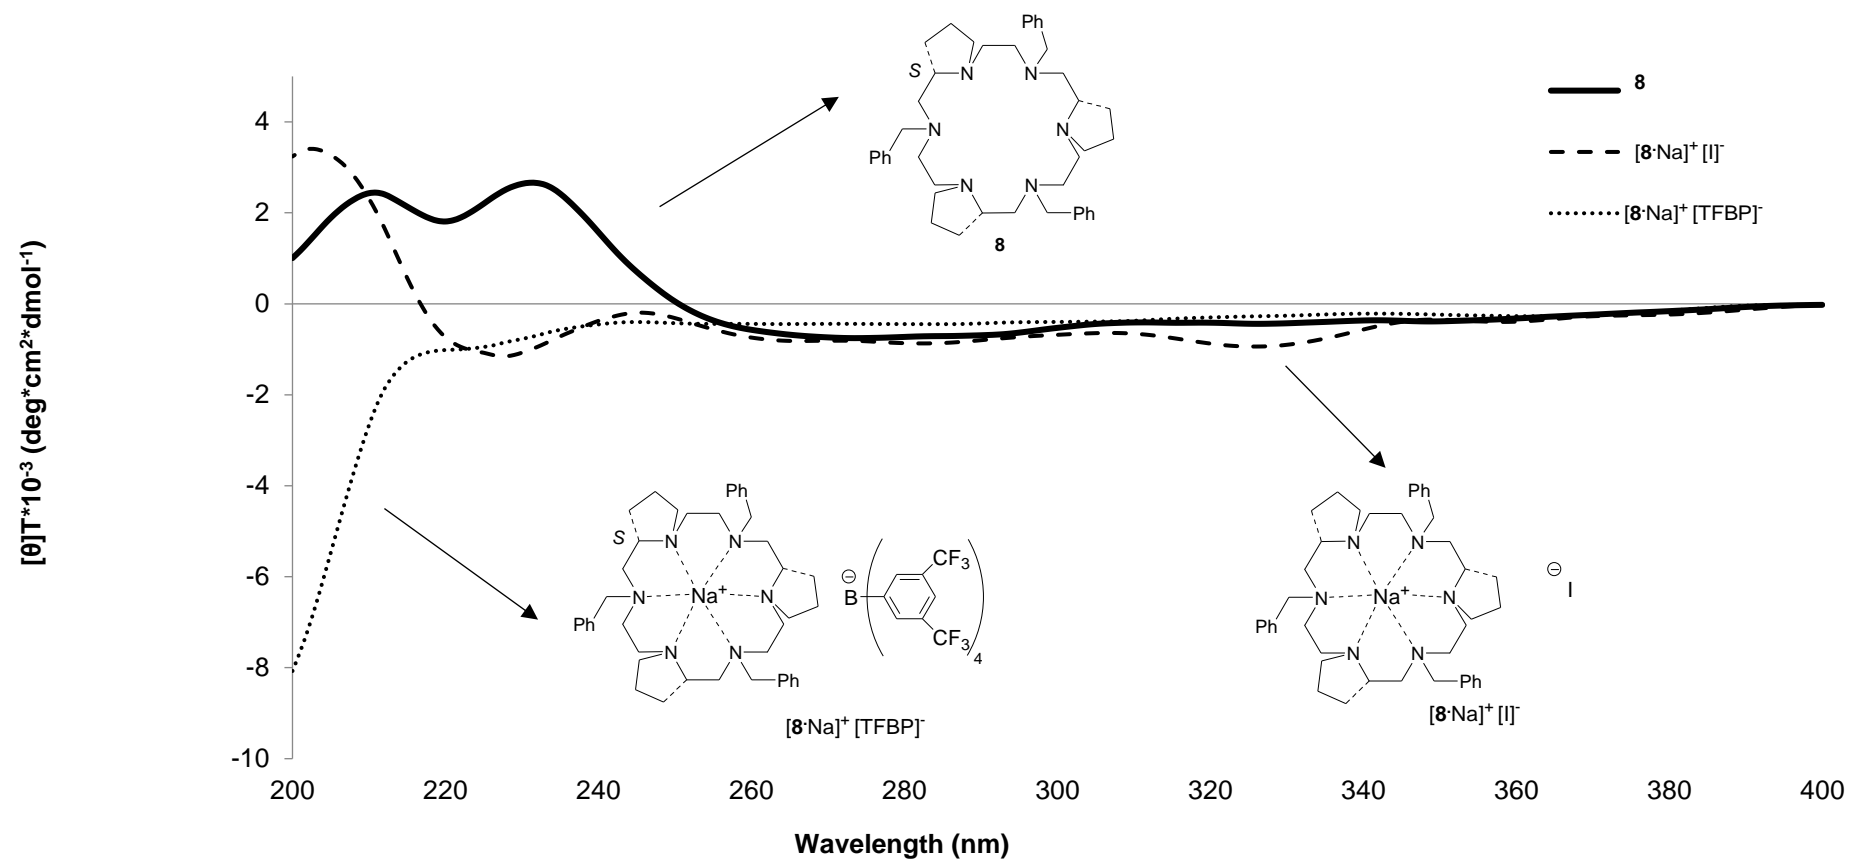

Figure S25. CD spectra of **8**, **8** in the presence of 1 equivalent NaTFPB, and **8** in the presence of 1 equivalent of NaI. Solvent: acetonitrile.

## 5.0 Computational Details

The DFT calculations were performed with the Gaussian09 set of programs,<sup>1</sup> using the BP86 functional of Becke and Perdew.<sup>2</sup> The electronic configuration of the molecular systems was described with the standard triple zeta valence basis set with a polarization function of Ahlrichs and co-workers for H, C, N, O, Na (TZVP keyword in Gaussian).<sup>3</sup> The geometry optimizations were performed without symmetry constraints, and the characterization of the located stationary points was performed by analytical frequency calculations. Solvent effects including contributions of non electrostatic terms have been estimated in single-point calculations on the gas phase optimized structures, based on the polarizable continuous solvation model PCM using CHCl<sub>3</sub> or Toluene as a solvent.<sup>4</sup>

---

<sup>1</sup> Gaussian 09, Revision A.02, Frisch, M. J.; Trucks, G. W.; Schlegel, H. B.; Scuseria, G. E.; Robb, M. A.; Cheeseman, J. R.; Scalmani, G.; Barone, V.; Mennucci, B.; Petersson, G. A.; Nakatsuji, H.; Caricato, M.; Li, X.; Hratchian, H. P.; Izmaylov, A. F.; Bloino, J.; Zheng, G.; Sonnenberg, J. L.; Hada, M.; Ehara, M.; Toyota, K.; Fukuda, R.; Hasegawa, J.; Ishida, M.; Nakajima, T.; Honda, Y.; Kitao, O.; Nakai, H.; Vreven, T.; Montgomery, J. A., Jr.; Peralta, J. E.; Ogliaro, F.; Bearpark, M.; Heyd, J. J.; Brothers, E.; N. Kudin, K.; Staroverov, V. N.; Kobayashi, R.; Normand, J.; Raghavachari, K.; Rendell, A.; Burant, J. C.; Iyengar, S. S.; Tomasi, J.; Cossi, M.; Rega, N.; Millam, J. M.; Klene, M.; Knox, J. E.; Cross, J. B.; Bakken, V.; Adamo, C.; Jaramillo, J.; Gomperts, R.; Stratmann, R. E.; Yazyev, O.; Austin, A. J.; Cammi, R.; Pomelli, C.; Ochterski, J. W.; Martin, R. L.; Morokuma, K.; Zakrzewski, V. G.; Voth, G. A.; Salvador, P.; Dannenberg, J. J.; Dapprich, S.; Daniels, A. D.; Farkas, O.; Foresman, J. B.; Ortiz, J. V.; Cioslowski, J.; Fox, D. J. Gaussian, Inc., Wallingford CT, **2009**.

<sup>2</sup> a) Becke, A. *Phys. Rev. A* **1988**, *38*, 3098– 3100. b) Perdew, J. P. *Phys. Rev. B* **1986**, *33*, 8822– 8824. c) Perdew, J. P. *Phys. Rev. B* **1986**, *34*, 7406– 7406.

<sup>3</sup> Schaefer, A., Horn, H. and Ahlrichs, R. *J. Chem. Phys.* **1994**, *100*, 5829– 5835.

<sup>4</sup> a) Barone, V. and Cossi, M. *J. Phys. Chem. A* **1998**, *102*, 1995– 2001. b) Tomasi, J. and Persico, M. *Chem. Rev.* **1994**, *94*, 2027– 2094.



## 5.1 Cartesian Coordinates and energies of calculated structures

74

13 E(gas)=-1760.39607517 E(CHCl3)=-1760.41146672

|   |           |           |           |
|---|-----------|-----------|-----------|
| C | 1.796215  | -2.177652 | 0.279454  |
| N | 0.937741  | -3.325260 | -0.032205 |
| N | 2.084858  | 0.224838  | -0.372965 |
| N | -0.244640 | 2.211273  | 0.051586  |
| N | -1.349998 | -1.338933 | 0.442115  |
| C | 3.212675  | -2.796905 | 0.177671  |
| H | 1.567986  | -1.813608 | 1.291028  |
| C | 1.583770  | -1.010061 | -0.730568 |
| C | 1.653172  | -4.370438 | -0.798110 |
| H | 1.651211  | -5.304695 | -0.214009 |
| H | 1.133880  | -4.570909 | -1.746061 |
| C | 3.063418  | -3.789238 | -0.989225 |
| H | 3.837635  | -4.568389 | -0.982251 |
| C | 1.772308  | 1.397285  | -1.201675 |
| H | 1.215147  | 1.040589  | -2.078611 |
| H | 2.701262  | 1.874976  | -1.543615 |
| C | 1.022829  | 2.493072  | -0.407536 |
| C | 2.910283  | 0.496819  | 0.807901  |
| H | 2.862190  | -0.363820 | 1.486526  |
| H | 2.458809  | 1.334665  | 1.363066  |
| C | 4.369353  | 0.817077  | 0.501634  |
| C | 4.994640  | 0.416876  | -0.687751 |
| H | 4.414489  | -0.099116 | -1.456957 |
| C | 6.350619  | 0.688768  | -0.907287 |
| H | 6.820576  | 0.375971  | -1.842503 |
| C | 7.099109  | 1.361606  | 0.062737  |
| H | 8.156247  | 1.575457  | -0.108381 |
| C | 6.480921  | 1.770473  | 1.250551  |
| H | 7.054031  | 2.307948  | 2.009368  |
| C | 5.125812  | 1.505550  | 1.463792  |
| H | 4.645480  | 1.841755  | 2.387058  |
| C | -0.984583 | 1.007582  | -0.278656 |
| H | -0.653566 | 0.620352  | -1.252491 |
| H | -2.045528 | 1.285772  | -0.389119 |
| C | -0.823408 | -0.115565 | 0.775831  |
| C | -0.905374 | 3.167511  | 0.957492  |
| H | -0.146149 | 3.923984  | 1.202132  |
| H | -1.175571 | 2.633242  | 1.882146  |
| C | -2.128324 | 3.822361  | 0.343178  |
| C | -2.020022 | 4.555472  | -0.851704 |
| H | -1.044806 | 4.644771  | -1.337139 |
| C | -3.141588 | 5.174528  | -1.409000 |
| H | -3.042368 | 5.746480  | -2.334504 |
| C | -4.389653 | 5.071413  | -0.780039 |
| H | -5.265197 | 5.557430  | -1.216122 |

|   |           |           |           |
|---|-----------|-----------|-----------|
| C | -4.507836 | 4.345848  | 0.408804  |
| H | -5.476918 | 4.261716  | 0.906064  |
| C | -3.382444 | 3.723645  | 0.964374  |
| H | -3.476477 | 3.158844  | 1.896550  |
| C | -1.032445 | -2.503887 | 1.272282  |
| H | -1.954068 | -2.967277 | 1.652172  |
| H | -0.439646 | -2.143133 | 2.124510  |
| C | -0.307800 | -3.598935 | 0.461745  |
| C | -2.211095 | -1.604940 | -0.730849 |
| H | -1.756075 | -2.425501 | -1.307168 |
| H | -2.203781 | -0.726105 | -1.383619 |
| C | -3.640675 | -1.957701 | -0.351948 |
| C | -4.576005 | -0.947766 | -0.070649 |
| H | -4.279740 | 0.103186  | -0.135627 |
| C | -5.889755 | -1.270391 | 0.280654  |
| H | -6.608087 | -0.474313 | 0.489275  |
| C | -6.285687 | -2.611433 | 0.355345  |
| H | -7.312880 | -2.864560 | 0.627285  |
| C | -5.362030 | -3.623820 | 0.076616  |
| H | -5.663913 | -4.672078 | 0.132731  |
| C | -4.046808 | -3.299637 | -0.276699 |
| H | -3.321731 | -4.092212 | -0.481105 |
| O | 0.962907  | -1.185356 | -1.785358 |
| O | 1.581573  | 3.572087  | -0.185812 |
| O | -0.187646 | 0.075702  | 1.819970  |
| O | -0.858195 | -4.686578 | 0.244584  |
| H | 3.127895  | -3.255441 | -1.949172 |
| H | 4.002382  | -2.051709 | 0.015561  |
| H | 3.434898  | -3.329641 | 1.115990  |

74

**13a** E(gas)=-1760.36268257 E(CHCl3)=-1760.37818581

|   |          |           |           |
|---|----------|-----------|-----------|
| H | 2.408042 | -0.924273 | 0.361312  |
| H | 0.959055 | -0.632084 | 1.338512  |
| C | 0.803362 | 0.159808  | -0.670965 |
| C | 1.679339 | -3.001066 | -0.959163 |
| H | 1.089437 | -3.890397 | -1.225466 |
| H | 1.827951 | -2.403809 | -1.873328 |
| C | 3.015022 | -3.401598 | -0.362929 |
| C | 3.078519 | -4.076368 | 0.868704  |
| H | 2.153461 | -4.291606 | 1.409424  |
| C | 4.307786 | -4.476712 | 1.398301  |
| H | 4.341054 | -5.004705 | 2.354191  |
| C | 5.494994 | -4.211593 | 0.703142  |
| H | 6.455268 | -4.527343 | 1.116798  |
| C | 5.443218 | -3.541035 | -0.522553 |
| H | 6.363901 | -3.328458 | -1.070838 |
| C | 4.210056 | -3.135795 | -1.048423 |
| H | 4.173286 | -2.609532 | -2.006607 |

|   |           |           |           |
|---|-----------|-----------|-----------|
| C | 0.160444  | 2.453234  | -1.083228 |
| H | -0.485837 | 1.889385  | -1.774049 |
| H | 0.872689  | 3.027828  | -1.694511 |
| C | -0.656759 | 3.519529  | -0.334696 |
| C | 1.698557  | 1.982198  | 0.837797  |
| H | 1.892530  | 1.167497  | 1.544468  |
| H | 1.111611  | 2.732841  | 1.388550  |
| C | 3.008043  | 2.580751  | 0.348293  |
| C | 4.180361  | 1.807416  | 0.322481  |
| H | 4.158043  | 0.775148  | 0.683215  |
| C | 5.384135  | 2.346674  | -0.141931 |
| H | 6.287727  | 1.732934  | -0.149280 |
| C | 5.430201  | 3.671891  | -0.588349 |
| H | 6.369436  | 4.095989  | -0.950399 |
| C | 4.270417  | 4.454040  | -0.559396 |
| H | 4.301372  | 5.492029  | -0.898188 |
| C | 3.067611  | 3.914915  | -0.089951 |
| H | 2.166704  | 4.534718  | -0.066554 |
| C | -2.414302 | 1.912231  | 0.760144  |
| C | -3.616286 | 2.110609  | -0.189630 |
| H | -2.847027 | 2.055345  | 1.770532  |
| N | -1.668077 | 3.189060  | 0.556091  |
| N | -1.859955 | -0.581958 | 0.505315  |
| C | -1.605610 | 0.629069  | 1.108404  |
| C | -2.720429 | 4.218092  | 0.750471  |
| C | -1.341179 | -1.805644 | 1.146069  |
| H | -2.191421 | -2.458593 | 1.390706  |
| H | -0.842478 | -1.498700 | 2.074928  |
| C | -0.427718 | -2.682531 | 0.256616  |
| C | -2.632510 | -0.805296 | -0.720874 |
| H | -2.024053 | -1.435625 | -1.388065 |
| H | -2.737010 | 0.151740  | -1.243391 |
| C | -3.997130 | -1.446297 | -0.509547 |
| C | -4.726579 | -1.282400 | 0.677134  |
| H | -4.290748 | -0.722371 | 1.508618  |
| C | -5.999846 | -1.846588 | 0.816976  |
| H | -6.550785 | -1.716030 | 1.751230  |
| C | -6.563414 | -2.578239 | -0.232972 |
| H | -7.556356 | -3.019700 | -0.124564 |
| C | -5.840567 | -2.752165 | -1.418755 |
| H | -6.266068 | -3.334207 | -2.239230 |
| C | -4.565101 | -2.196154 | -1.551722 |
| H | -3.997350 | -2.352224 | -2.473145 |
| N | 0.841441  | -2.230290 | -0.025334 |
| N | 0.844605  | 1.468841  | -0.254537 |
| O | 0.287793  | -0.178078 | -1.742927 |
| O | -0.407707 | 4.705541  | -0.583998 |
| O | -0.859959 | 0.715424  | 2.093671  |

|   |           |           |           |
|---|-----------|-----------|-----------|
| O | -0.843646 | -3.778496 | -0.131977 |
| C | 1.307639  | -0.901438 | 0.331140  |
| C | -4.014942 | 3.572873  | 0.154498  |
| H | -2.406138 | 5.137192  | 0.246601  |
| H | -2.829652 | 4.423774  | 1.826222  |
| H | -4.361771 | 4.115935  | -0.735059 |
| H | -4.831140 | 3.589197  | 0.891518  |
| H | -4.432031 | 1.395549  | -0.021085 |
| H | -3.303640 | 2.043382  | -1.242486 |

74

**13b** E(gas)=-1760.37719057 E(CHCl3)=-1760.39724986

|   |           |           |           |
|---|-----------|-----------|-----------|
| C | -1.408546 | -1.680669 | 0.798229  |
| C | -1.908898 | 0.495691  | 1.805425  |
| C | -1.160204 | 1.841621  | 1.902746  |
| C | -1.055364 | -2.500156 | -0.464358 |
| C | 0.837031  | 1.076035  | 0.542658  |
| C | 1.165618  | -0.214048 | 1.322327  |
| C | 1.643817  | -2.608866 | 1.229714  |
| C | 0.937217  | -3.807850 | 0.579562  |
| C | 2.123267  | -1.208635 | -0.773512 |
| C | 3.644568  | -1.069823 | -0.796006 |
| C | 0.788573  | 3.300708  | 1.654805  |
| C | 1.008899  | 4.191341  | 0.447824  |
| C | -0.785305 | -4.921931 | -0.730854 |
| H | 0.015024  | -5.544068 | -1.151339 |
| C | -2.212944 | 0.235054  | -0.643103 |
| C | -3.730424 | 0.365644  | -0.756375 |
| H | -1.768726 | 1.238789  | -0.765043 |
| H | -2.968791 | 0.760389  | 1.936977  |
| H | -1.600755 | -0.108788 | 2.671154  |
| C | -2.321122 | -3.130548 | -1.106929 |
| H | -0.545929 | -1.851371 | -1.198164 |
| H | 0.310259  | 0.829752  | -0.390472 |
| H | 1.773615  | 1.568335  | 0.236134  |
| H | 1.236677  | -2.483879 | 2.243444  |
| H | 2.697906  | -2.913510 | 1.322622  |
| H | 1.839160  | -2.108224 | -1.345187 |
| H | 1.677883  | -0.353959 | -1.305943 |
| H | 0.166709  | 3.809370  | 2.404175  |
| H | 1.753205  | 3.045674  | 2.123934  |
| H | -1.264946 | -5.501845 | 0.076357  |
| C | -1.801499 | -4.418950 | -1.755847 |
| H | -1.839061 | -0.370944 | -1.482052 |
| N | 0.083325  | 2.043606  | 1.328946  |
| N | 1.523007  | -1.315078 | 0.556827  |
| N | -0.206494 | -3.675375 | -0.177310 |
| N | -1.726996 | -0.336995 | 0.614176  |
| O | 1.033940  | -0.267013 | 2.542139  |

|   |           |           |           |
|---|-----------|-----------|-----------|
| O | 1.428388  | -4.925654 | 0.767913  |
| O | -1.368492 | -2.198284 | 1.911500  |
| O | -1.709709 | 2.722848  | 2.570153  |
| C | -4.264846 | 1.333716  | -1.621624 |
| C | -5.646845 | 1.453045  | -1.793075 |
| C | -6.515823 | 0.611747  | -1.088910 |
| C | -5.992175 | -0.346055 | -0.214987 |
| C | -4.607639 | -0.469750 | -0.050868 |
| H | -3.591967 | 2.004420  | -2.164315 |
| H | -6.046557 | 2.212328  | -2.468896 |
| H | -7.596243 | 0.709357  | -1.213677 |
| H | -6.663160 | -0.997793 | 0.348924  |
| H | -4.209802 | -1.211194 | 0.645600  |
| C | 2.303134  | 4.499914  | 0.003161  |
| C | 2.501290  | 5.329184  | -1.108501 |
| C | 1.401972  | 5.859993  | -1.788766 |
| C | 0.104455  | 5.561058  | -1.350649 |
| C | -0.090390 | 4.734551  | -0.241639 |
| H | 3.166960  | 4.093957  | 0.537959  |
| H | 3.516023  | 5.559807  | -1.440777 |
| H | 1.552721  | 6.508454  | -2.654636 |
| H | -0.757919 | 5.984864  | -1.870769 |
| H | -1.102146 | 4.514881  | 0.109510  |
| C | 4.335603  | -1.369357 | -1.981301 |
| C | 5.721843  | -1.211697 | -2.058468 |
| C | 6.439581  | -0.760089 | -0.944531 |
| C | 5.760364  | -0.469851 | 0.242209  |
| C | 4.370304  | -0.622580 | 0.316190  |
| H | 3.783255  | -1.733523 | -2.852851 |
| H | 6.244570  | -1.450952 | -2.987234 |
| H | 7.523942  | -0.643874 | -1.000040 |
| H | 6.312956  | -0.128419 | 1.120325  |
| H | 3.853262  | -0.405721 | 1.253875  |
| H | -1.305345 | -4.197981 | -2.714817 |
| H | -2.600577 | -5.148437 | -1.947508 |
| H | -2.818458 | -2.445283 | -1.806402 |
| H | -3.039734 | -3.379572 | -0.310261 |

91

(*S,S*)- $\Delta(\delta\delta\delta\delta)$ -[3·Na]<sup>+</sup> E(gas)=-1858.60049697 E(CHCl<sub>3</sub>)=-1858.64697181

|   |           |          |           |
|---|-----------|----------|-----------|
| C | -1.075101 | 1.898225 | -2.765233 |
| H | -1.732282 | 2.599611 | -3.322388 |
| H | -0.764949 | 1.139278 | -3.498084 |
| C | 0.156038  | 2.681078 | -2.289796 |
| H | 0.524583  | 3.271711 | -3.153218 |
| H | -0.150332 | 3.408285 | -1.524138 |
| C | -2.689500 | 2.230138 | -0.986750 |
| H | -2.042441 | 3.082329 | -0.732753 |
| H | -3.465595 | 2.609103 | -1.685520 |

|   |           |           |           |
|---|-----------|-----------|-----------|
| C | -3.350367 | 1.732493  | 0.280788  |
| C | -2.631777 | 1.691146  | 1.488216  |
| H | -1.592620 | 2.033647  | 1.514434  |
| C | -3.247132 | 1.268183  | 2.671288  |
| H | -2.682474 | 1.265251  | 3.606257  |
| C | -4.591078 | 0.876012  | 2.664086  |
| H | -5.073733 | 0.553728  | 3.588812  |
| C | -5.319242 | 0.921358  | 1.470836  |
| H | -6.372928 | 0.635214  | 1.461005  |
| C | -4.702909 | 1.352113  | 0.290343  |
| H | -5.287019 | 1.415205  | -0.632116 |
| C | 1.961912  | 1.095509  | -2.749099 |
| H | 2.703991  | 1.738281  | -3.263911 |
| H | 1.239592  | 0.811935  | -3.528548 |
| C | 2.701173  | -0.152344 | -2.251222 |
| H | 3.310708  | -0.543576 | -3.095018 |
| H | 3.414956  | 0.133519  | -1.465051 |
| C | 2.166424  | 2.653896  | -0.838552 |
| C | 2.792315  | 3.873477  | -1.538797 |
| H | 2.988003  | 1.961077  | -0.597712 |
| C | 1.511597  | 2.994185  | 0.499059  |
| C | 1.570905  | 2.053934  | 1.544606  |
| H | 2.051562  | 4.637628  | -1.812570 |
| C | 1.016205  | 2.330973  | 2.798988  |
| H | 1.102731  | 1.597817  | 3.603932  |
| C | 0.383769  | 3.558153  | 3.030825  |
| H | -0.037485 | 3.784910  | 4.012173  |
| C | 0.318394  | 4.503218  | 2.002353  |
| H | -0.157771 | 5.470037  | 2.178156  |
| C | 0.881110  | 4.224720  | 0.750485  |
| H | 0.851586  | 4.995564  | -0.022347 |
| C | 1.075113  | -1.898338 | -2.765171 |
| H | 1.732302  | -2.599743 | -3.322295 |
| H | 0.764970  | -1.139417 | -3.498051 |
| C | -0.156031 | -2.681179 | -2.289725 |
| H | -0.524569 | -3.271835 | -3.153135 |
| H | 0.150329  | -3.408367 | -1.524045 |
| C | 2.689484  | -2.230187 | -0.986650 |
| H | 3.465577  | -2.609191 | -1.685402 |
| H | 2.042420  | -3.082362 | -0.732611 |
| C | 3.350362  | -1.732487 | 0.280859  |
| C | 4.702916  | -1.352152 | 0.290391  |
| H | 5.287020  | -1.415308 | -0.632067 |
| C | 5.319266  | -0.921353 | 1.470860  |
| H | 6.372962  | -0.635245 | 1.461011  |
| C | 4.591107  | -0.875920 | 2.664109  |
| H | 5.073775  | -0.553604 | 3.588817  |
| C | 3.247147  | -1.268044 | 2.671335  |

|    |           |           |           |
|----|-----------|-----------|-----------|
| H  | 2.682491  | -1.265043 | 3.606304  |
| C  | 2.631775  | -1.691049 | 1.488286  |
| H  | 1.592607  | -2.033516 | 1.514527  |
| C  | -1.961902 | -1.095619 | -2.749085 |
| H  | -2.703976 | -1.738401 | -3.263889 |
| H  | -1.239575 | -0.812063 | -3.528535 |
| C  | -2.701167 | 0.152247  | -2.251246 |
| H  | -3.310701 | 0.543453  | -3.095055 |
| H  | -3.414952 | -0.133597 | -1.465070 |
| C  | -2.166417 | -2.653962 | -0.838496 |
| C  | -2.792260 | -3.873596 | -1.538697 |
| H  | -2.988022 | -1.961156 | -0.597709 |
| C  | -1.511610 | -2.994163 | 0.499146  |
| C  | -1.570986 | -2.053864 | 1.544648  |
| H  | -3.323597 | -3.581767 | -2.456056 |
| C  | -1.016301 | -2.330816 | 2.799055  |
| H  | -1.102879 | -1.597625 | 3.603961  |
| C  | -0.383808 | -3.557955 | 3.030964  |
| H  | 0.037437  | -3.784643 | 4.012331  |
| C  | -0.318365 | -4.503064 | 2.002538  |
| H  | 0.157844  | -5.469852 | 2.178396  |
| C  | -0.881069 | -4.224654 | 0.750644  |
| H  | -0.851485 | -4.995532 | -0.022152 |
| N  | -1.837430 | 1.219409  | -1.688490 |
| N  | 1.225984  | 1.841716  | -1.700570 |
| N  | 1.837426  | -1.219485 | -1.688442 |
| N  | -1.225982 | -1.841802 | -1.700531 |
| Na | -0.000011 | -0.000026 | -0.439233 |
| H  | -3.526500 | -4.346582 | -0.871229 |
| H  | -2.051499 | -4.637794 | -1.812314 |
| H  | 3.323767  | 3.581577  | -2.456066 |
| H  | 3.526464  | 4.346548  | -0.871288 |
| H  | -2.111265 | -1.112491 | 1.395435  |
| H  | 2.111143  | 1.112529  | 1.395450  |

91

(*S,S*)- $\Delta(\lambda\lambda\lambda\lambda)$ -[3Na]<sup>+</sup> E(gas)=-1858.58693717 E(CHCl<sub>3</sub>)=-1858.62972051

|   |           |           |           |
|---|-----------|-----------|-----------|
| N | -1.726342 | 1.469228  | -1.397444 |
| N | -1.427049 | -1.653507 | -1.369720 |
| N | 1.726230  | -1.469154 | -1.397343 |
| N | 1.426973  | 1.653523  | -1.369613 |
| C | -2.212410 | 0.526756  | -2.438770 |
| H | -3.114112 | 0.938170  | -2.939863 |
| H | -1.443711 | 0.466147  | -3.224608 |
| C | -2.561640 | -0.889937 | -1.956723 |
| H | -3.006784 | -1.424281 | -2.822867 |
| H | -3.345191 | -0.820791 | -1.192665 |
| C | -2.864040 | 2.163177  | -0.712918 |
| H | -3.473710 | 2.700336  | -1.469904 |

|   |           |           |           |
|---|-----------|-----------|-----------|
| H | -2.412225 | 2.925944  | -0.059890 |
| C | -3.778671 | 1.295158  | 0.124297  |
| C | -5.074686 | 0.978025  | -0.313133 |
| H | -5.422525 | 1.351132  | -1.280638 |
| C | -5.928177 | 0.198521  | 0.476500  |
| H | -6.933817 | -0.035866 | 0.121394  |
| C | -5.499390 | -0.265088 | 1.724788  |
| H | -6.167534 | -0.863497 | 2.347223  |
| C | -4.218223 | 0.065034  | 2.183699  |
| H | -3.892313 | -0.266626 | 3.172138  |
| C | -3.368088 | 0.841984  | 1.389916  |
| H | -2.385775 | 1.138802  | 1.770620  |
| C | -0.517587 | -2.103326 | -2.451875 |
| H | -0.959000 | -2.941556 | -3.026650 |
| H | -0.439457 | -1.274306 | -3.171891 |
| C | 0.889407  | -2.531655 | -2.023370 |
| H | 1.396023  | -2.950742 | -2.919613 |
| H | 0.814378  | -3.352617 | -1.299313 |
| C | -1.958944 | -2.763550 | -0.484854 |
| H | -2.826019 | -2.296250 | 0.008964  |
| C | -2.492430 | -3.990238 | -1.240592 |
| C | -1.001759 | -3.107971 | 0.661879  |
| C | -0.301170 | -4.321238 | 0.748865  |
| H | -3.225743 | -3.690305 | -2.003439 |
| C | 0.529360  | -4.599230 | 1.842580  |
| H | 1.058901  | -5.553181 | 1.889323  |
| C | 0.665172  | -3.672938 | 2.880713  |
| H | 1.300477  | -3.897389 | 3.739535  |
| C | -0.046991 | -2.468906 | 2.823151  |
| H | 0.013785  | -1.758591 | 3.651113  |
| C | -0.870841 | -2.195177 | 1.726050  |
| H | -1.483143 | -1.286224 | 1.725108  |
| C | 2.212443  | -0.526714 | -2.438603 |
| H | 3.114195  | -0.938137 | -2.939595 |
| H | 1.443830  | -0.466083 | -3.224528 |
| C | 2.561624  | 0.889992  | -1.956486 |
| H | 3.006880  | 1.424366  | -2.822566 |
| H | 3.345056  | 0.820837  | -1.192310 |
| C | 2.863843  | -2.163143 | -0.712671 |
| H | 2.411907  | -2.925669 | -0.059454 |
| H | 3.473349  | -2.700585 | -1.469577 |
| C | 3.778794  | -1.295219 | 0.124314  |
| C | 3.368534  | -0.842003 | 1.390026  |
| H | 2.386207  | -1.138606 | 1.770869  |
| C | 4.218952  | -0.065238 | 2.183683  |
| H | 3.893282  | 0.266438  | 3.172198  |
| C | 5.500100  | 0.264640  | 1.724552  |
| H | 6.168489  | 0.862883  | 2.346884  |



|    |           |           |           |
|----|-----------|-----------|-----------|
| C  | 5.928568  | -0.199003 | 0.476165  |
| H  | 6.934175  | 0.035233  | 0.120870  |
| C  | 5.074786  | -0.978326 | -0.313334 |
| H  | 5.422401  | -1.351503 | -1.280894 |
| C  | 0.517558  | 2.103266  | -2.451832 |
| H  | 0.959068  | 2.941378  | -3.026712 |
| H  | 0.439347  | 1.274165  | -3.171740 |
| C  | -0.889404 | 2.531713  | -2.023400 |
| H  | -1.395952 | 2.950901  | -2.919635 |
| H  | -0.814368 | 3.352615  | -1.299281 |
| C  | 1.958695  | 2.763591  | -0.484772 |
| H  | 2.825861  | 2.296434  | 0.009033  |
| C  | 2.492268  | 3.990521  | -1.240608 |
| C  | 1.001536  | 3.108074  | 0.661932  |
| C  | 0.301049  | 4.321401  | 0.748923  |
| H  | 3.225605  | 3.690593  | -2.003425 |
| C  | -0.529491 | 4.599468  | 1.842608  |
| H  | -1.058922 | 5.553481  | 1.889348  |
| C  | -0.665461 | 3.673155  | 2.880706  |
| H  | -1.300757 | 3.897655  | 3.739523  |
| C  | 0.046573  | 2.469052  | 2.823137  |
| H  | -0.014360 | 1.758703  | 3.651060  |
| C  | 0.870457  | 2.195270  | 1.726082  |
| H  | 1.482587  | 1.286201  | 1.725103  |
| Na | -0.000047 | -0.000027 | -0.198684 |
| H  | 1.706105  | 4.572781  | -1.742129 |
| H  | 3.003676  | 4.664932  | -0.538977 |
| H  | -1.706286 | -4.572492 | -1.742154 |
| H  | -3.003895 | -4.664734 | -0.539077 |
| H  | 0.410804  | 5.075690  | -0.033098 |
| H  | -0.410843 | -5.075511 | -0.033185 |

91

(S,S)- $\Lambda$ ( $\delta\delta\delta\delta$ )-[3 $\cdot$ Na]<sup>+</sup> E(gas)=-1858.57997014 E(CHCl<sub>3</sub>)=-1858.62655292

|   |           |           |           |
|---|-----------|-----------|-----------|
| N | -1.135250 | 1.862823  | -1.362476 |
| N | 2.001494  | 1.188343  | -1.356148 |
| N | 1.135040  | -1.862878 | -1.362707 |
| N | -2.001702 | -1.188361 | -1.355957 |
| C | -0.131066 | 2.157126  | -2.417107 |
| H | -0.426282 | 3.072775  | -2.973614 |
| H | -0.170802 | 1.340759  | -3.153815 |
| C | 1.310617  | 2.374227  | -1.942095 |
| H | 1.884748  | 2.770359  | -2.808232 |
| H | 1.299742  | 3.162588  | -1.183306 |
| C | -1.508464 | 3.096944  | -0.604946 |
| H | -1.556763 | 3.965217  | -1.292792 |
| H | -2.530786 | 2.939061  | -0.228273 |
| C | -0.639558 | 3.451809  | 0.587623  |
| C | -0.013932 | 4.704950  | 0.673761  |

|   |           |           |           |
|---|-----------|-----------|-----------|
| H | -0.102717 | 5.408252  | -0.159261 |
| C | 0.702963  | 5.074627  | 1.818395  |
| H | 1.175309  | 6.057794  | 1.868572  |
| C | 0.805903  | 4.192423  | 2.898227  |
| H | 1.357970  | 4.481898  | 3.794312  |
| C | 0.178290  | 2.942142  | 2.831236  |
| H | 0.227349  | 2.262093  | 3.684809  |
| C | -0.540966 | 2.580577  | 1.687470  |
| H | -1.097917 | 1.637957  | 1.675737  |
| C | 2.241307  | 0.179225  | -2.429840 |
| H | 3.167764  | 0.428282  | -2.988249 |
| H | 1.430116  | 0.266551  | -3.166628 |
| C | 2.358503  | -1.286106 | -1.988624 |
| H | 2.657018  | -1.875029 | -2.882262 |
| H | 3.173240  | -1.378028 | -1.263607 |
| C | 3.330681  | 1.629681  | -0.774571 |
| C | 3.227722  | 2.851239  | 0.155673  |
| H | 3.977750  | 1.917713  | -1.631794 |
| C | 4.052577  | 0.507437  | -0.038257 |
| C | 5.282533  | 0.027410  | -0.514222 |
| H | 2.457871  | 2.714888  | 0.929034  |
| C | 5.981643  | -0.971371 | 0.174236  |
| H | 6.936402  | -1.331880 | -0.214193 |
| C | 5.461928  | -1.499583 | 1.360011  |
| H | 6.006661  | -2.274686 | 1.902467  |
| C | 4.247069  | -1.012442 | 1.859026  |
| H | 3.848592  | -1.403995 | 2.797659  |
| C | 3.552905  | -0.014954 | 1.167246  |
| H | 2.623652  | 0.383069  | 1.585391  |
| C | 0.130702  | -2.156997 | -2.417257 |
| H | 0.425868  | -3.072527 | -2.973980 |
| H | 0.170314  | -1.340489 | -3.153809 |
| C | -1.310908 | -2.374202 | -1.942102 |
| H | -1.885148 | -2.770226 | -2.808214 |
| H | -1.299967 | -3.162659 | -1.183408 |
| C | 1.508293  | -3.097173 | -0.605484 |
| H | 2.530811  | -2.939595 | -0.229215 |
| H | 1.556077  | -3.965385 | -1.293435 |
| C | 0.639759  | -3.451878 | 0.587402  |
| C | 0.541543  | -2.580526 | 1.687193  |
| H | 1.098577  | -1.637961 | 1.675185  |
| C | -0.177379 | -2.941940 | 2.831214  |
| H | -0.226144 | -2.261798 | 3.684733  |
| C | -0.805033 | -4.192186 | 2.898527  |
| H | -1.356847 | -4.481540 | 3.794806  |
| C | -0.702462 | -5.074501 | 1.818753  |
| H | -1.174840 | -6.057641 | 1.869173  |
| C | 0.014097  | -4.704976 | 0.673858  |

|    |           |           |           |
|----|-----------|-----------|-----------|
| H  | 0.102573  | -5.408366 | -0.159123 |
| C  | -2.241730 | -0.179182 | -2.429575 |
| H  | -3.168309 | -0.428206 | -2.987792 |
| H  | -1.430696 | -0.266494 | -3.166537 |
| C  | -2.358809 | 1.286128  | -1.988273 |
| H  | -2.657408 | 1.875105  | -2.881846 |
| H  | -3.173470 | 1.378054  | -1.263171 |
| C  | -3.330743 | -1.629817 | -0.774168 |
| C  | -3.227367 | -2.851230 | 0.156253  |
| H  | -3.977841 | -1.918117 | -1.631275 |
| C  | -4.052720 | -0.507552 | -0.037990 |
| C  | -5.282700 | -0.027629 | -0.513999 |
| H  | -3.018653 | -3.783445 | -0.384362 |
| C  | -5.981822 | 0.971231  | 0.174331  |
| H  | -6.936602 | 1.331653  | -0.214126 |
| C  | -5.462097 | 1.499631  | 1.360022  |
| H  | -6.006835 | 2.274813  | 1.902361  |
| C  | -4.247220 | 1.012592  | 1.859084  |
| H  | -3.848730 | 1.404289  | 2.797652  |
| C  | -3.553043 | 0.015024  | 1.167431  |
| H  | -2.623776 | -0.382907 | 1.585629  |
| Na | -0.000283 | -0.000097 | -0.205441 |
| H  | -4.192010 | -2.981361 | 0.666196  |
| H  | -2.456928 | -2.714890 | 0.929028  |
| H  | 3.018471  | 3.783317  | -0.384953 |
| H  | 4.192713  | 2.981606  | 0.664901  |
| H  | -5.697989 | -0.439915 | -1.437990 |
| H  | 5.697819  | 0.439540  | -1.438285 |

91

(S,S)-Λ(λλλλ)-[3·Na]<sup>+</sup> SS-III-Lambda E(gas)=-1858.59209289 E(CHCl<sub>3</sub>)=-1858.63830389

|   |           |           |           |
|---|-----------|-----------|-----------|
| C | -1.176702 | -1.742269 | -2.751605 |
| H | -1.872829 | -2.359497 | -3.359883 |
| H | -0.768815 | -0.987859 | -3.440974 |
| C | -0.051661 | -2.658230 | -2.259453 |
| H | 0.277980  | -3.281252 | -3.118191 |
| H | -0.455127 | -3.358983 | -1.515500 |
| C | -2.826238 | -1.988730 | -0.980469 |
| H | -2.221727 | -2.856656 | -0.679333 |
| H | -3.596676 | -2.358788 | -1.689693 |
| C | -3.502035 | -1.418348 | 0.248093  |
| C | -2.789928 | -1.273299 | 1.451296  |
| H | -1.752446 | -1.618064 | 1.510512  |
| C | -3.413026 | -0.759508 | 2.593529  |
| H | -2.853667 | -0.673351 | 3.527781  |
| C | -4.761670 | -0.385065 | 2.550409  |
| H | -5.250735 | 0.007900  | 3.443853  |
| C | -5.485172 | -0.540303 | 1.363823  |
| H | -6.542342 | -0.269579 | 1.327519  |

|   |           |           |           |
|---|-----------|-----------|-----------|
| C | -4.858250 | -1.054679 | 0.222905  |
| H | -5.434817 | -1.189739 | -0.696443 |
| C | 1.926967  | -1.316853 | -2.695443 |
| H | 2.636489  | -2.028780 | -3.163287 |
| H | 1.238180  | -1.032976 | -3.505110 |
| C | 2.722445  | -0.077689 | -2.257538 |
| H | 3.299466  | 0.278141  | -3.139478 |
| H | 3.458010  | -0.362969 | -1.498426 |
| C | 1.884230  | -3.042318 | -0.871835 |
| H | 1.920593  | -3.947189 | -1.515937 |
| C | 3.338816  | -2.691848 | -0.529846 |
| C | 1.133590  | -3.420497 | 0.402308  |
| C | 1.078357  | -2.538043 | 1.496713  |
| H | 3.954784  | -2.537619 | -1.426477 |
| C | 0.444043  | -2.911447 | 2.686505  |
| H | 0.434644  | -2.224917 | 3.536316  |
| C | -0.155225 | -4.171993 | 2.800923  |
| H | -0.644983 | -4.465237 | 3.731380  |
| C | -0.105001 | -5.058953 | 1.721905  |
| H | -0.556811 | -6.049518 | 1.805203  |
| C | 0.538735  | -4.684837 | 0.535564  |
| H | 0.594338  | -5.394468 | -0.295213 |
| C | 1.176594  | 1.741528  | -2.751672 |
| H | 1.872710  | 2.358692  | -3.360029 |
| H | 0.768675  | 0.987067  | -3.440966 |
| C | 0.051588  | 2.657560  | -2.259572 |
| H | -0.278076 | 3.280485  | -3.118371 |
| H | 0.455077  | 3.358394  | -1.515710 |
| C | 2.826215  | 1.988126  | -0.980653 |
| H | 3.596576  | 2.358151  | -1.689980 |
| H | 2.221715  | 2.856060  | -0.679527 |
| C | 3.502168  | 1.417881  | 0.247888  |
| C | 4.858356  | 1.054121  | 0.222538  |
| H | 5.434783  | 1.188997  | -0.696925 |
| C | 5.485438  | 0.539904  | 1.363440  |
| H | 6.542583  | 0.269106  | 1.327005  |
| C | 4.762128  | 0.384930  | 2.550178  |
| H | 5.251318  | -0.007902 | 3.443611  |
| C | 3.413517  | 0.759476  | 2.593461  |
| H | 2.854316  | 0.673531  | 3.527827  |
| C | 2.790258  | 1.273095  | 1.451238  |
| H | 1.752807  | 1.617934  | 1.510551  |
| C | -1.927049 | 1.316163  | -2.695419 |
| H | -2.636582 | 2.028076  | -3.163266 |
| H | -1.238268 | 1.032266  | -3.505081 |
| C | -2.722519 | 0.077006  | -2.257499 |
| H | -3.299537 | -0.278828 | -3.139441 |
| H | -3.458092 | 0.362287  | -1.498400 |

|    |           |           |           |
|----|-----------|-----------|-----------|
| C  | -1.884431 | 3.041900  | -0.872239 |
| H  | -1.921314 | 3.946391  | -1.516845 |
| C  | -3.338873 | 2.690979  | -0.529665 |
| C  | -1.133697 | 3.421074  | 0.401538  |
| C  | -1.077745 | 2.539147  | 1.496327  |
| H  | -3.955177 | 2.536892  | -1.426091 |
| C  | -0.443458 | 2.913462  | 2.685842  |
| H  | -0.433491 | 2.227323  | 3.535962  |
| C  | 0.155060  | 4.174425  | 2.799592  |
| H  | 0.644796  | 4.468383  | 3.729836  |
| C  | 0.104138  | 5.060860  | 1.720175  |
| H  | 0.555378  | 6.051729  | 1.802946  |
| C  | -0.539574 | 4.685827  | 0.534111  |
| H  | -0.595732 | 5.395034  | -0.296992 |
| N  | -1.916962 | -1.029220 | -1.682637 |
| N  | 1.120510  | -1.978336 | -1.635121 |
| N  | 1.916895  | 1.028548  | -1.682682 |
| N  | -1.120594 | 1.977760  | -1.635125 |
| Na | -0.000087 | -0.000342 | -0.460517 |
| H  | -3.419884 | 1.806387  | 0.117550  |
| H  | -3.772241 | 3.539540  | 0.018551  |
| H  | 3.420373  | -1.807492 | 0.117623  |
| H  | 3.772249  | -3.540687 | 0.017895  |
| H  | 1.587797  | -1.569993 | 1.444919  |
| H  | -1.586582 | 1.570758  | 1.445019  |

73

(1R,2S,4S,7R,8S,10S)-(δδδδ)- [7·Na]<sup>+</sup> E(gas)=-1472.60310273 E(Toluene)=-1472.64083526

|   |           |           |           |
|---|-----------|-----------|-----------|
| C | 1.982868  | -0.823051 | -0.795028 |
| H | 2.922614  | -0.971042 | -1.363544 |
| H | 1.262639  | -0.392676 | -1.508049 |
| C | 1.478383  | -2.199002 | -0.341147 |
| H | 1.512307  | -2.868654 | -1.223239 |
| H | 2.177427  | -2.625995 | 0.393817  |
| C | 3.328500  | -0.178302 | 1.192605  |
| H | 3.119389  | -1.155880 | 1.654767  |
| C | 4.705785  | -0.211926 | 0.550194  |
| H | 3.319943  | 0.565418  | 2.005895  |
| C | 5.490959  | 0.951147  | 0.461012  |
| C | 6.750162  | 0.922156  | -0.146258 |
| C | 7.248676  | -0.275454 | -0.670748 |
| C | 6.488110  | -1.445145 | -0.572636 |
| C | 5.229211  | -1.411290 | 0.036014  |
| H | 5.124365  | 1.887402  | 0.890937  |
| H | 7.349620  | 1.833354  | -0.198929 |
| H | 8.234455  | -0.300169 | -1.139176 |
| H | 6.880623  | -2.387655 | -0.959907 |
| H | 4.656693  | -2.338338 | 0.133126  |
| C | -0.953982 | -2.156308 | -0.742838 |

|   |           |           |           |
|---|-----------|-----------|-----------|
| C | -1.202846 | -3.647223 | -1.152382 |
| H | -0.595573 | -1.569691 | -1.601260 |
| C | -2.266443 | -1.539983 | -0.213954 |
| H | -3.021117 | -1.620612 | -1.021931 |
| H | -2.636134 | -2.168875 | 0.612300  |
| C | -0.125116 | -3.457125 | 1.022865  |
| C | -0.513866 | -4.495792 | -0.051206 |
| H | -0.960108 | -3.298647 | 1.724488  |
| H | 0.753561  | -3.738221 | 1.620060  |
| H | -0.788393 | -3.862400 | -2.146433 |
| H | 0.382326  | -4.996483 | -0.445202 |
| H | -2.281672 | -3.854228 | -1.211719 |
| C | -1.982538 | 0.822915  | -0.794541 |
| H | -2.922020 | 0.970445  | -1.363607 |
| H | -1.261775 | 0.392592  | -1.507054 |
| C | -1.478464 | 2.198949  | -0.340623 |
| H | -1.512579 | 2.868693  | -1.222621 |
| H | -2.177477 | 2.625695  | 0.394506  |
| C | -3.328559 | 0.178195  | 1.192903  |
| C | -4.705734 | 0.211820  | 0.550276  |
| H | -3.119523 | 1.155754  | 1.655127  |
| H | -3.320129 | -0.565524 | 2.006198  |
| C | -5.490908 | -0.951244 | 0.460985  |
| C | -6.750014 | -0.922254 | -0.146488 |
| C | -7.248436 | 0.275351  | -0.671077 |
| C | -6.487872 | 1.445035  | -0.572867 |
| C | -5.229065 | 1.411176  | 0.035975  |
| H | -5.124393 | -1.887494 | 0.890991  |
| H | -7.349469 | -1.833449 | -0.199240 |
| H | -8.234142 | 0.300066  | -1.139660 |
| H | -6.880314 | 2.387544  | -0.960212 |
| H | -4.656559 | 2.338224  | 0.133150  |
| C | 0.953865  | 2.156484  | -0.742743 |
| C | 1.203066  | 3.647490  | -1.152037 |
| H | 0.595007  | 1.570109  | -1.601136 |
| C | 2.266389  | 1.539922  | -0.214287 |
| H | 3.020895  | 1.620676  | -1.022406 |
| H | 2.636244  | 2.168699  | 0.611980  |
| C | 0.124952  | 3.457619  | 1.022798  |
| C | 0.512662  | 4.495998  | -0.051782 |
| H | 0.960369  | 3.299718  | 1.724055  |
| H | -0.753537 | 3.738500  | 1.620378  |
| H | 0.790116  | 3.862633  | -2.146714 |
| H | 2.281970  | 3.854552  | -1.209794 |
| N | 2.166714  | 0.155708  | 0.302544  |
| N | 0.130256  | -2.180349 | 0.294356  |
| N | -2.166651 | -0.155830 | 0.303025  |
| N | -0.130213 | 2.180538  | 0.294788  |

|    |           |           |           |
|----|-----------|-----------|-----------|
| Na | 0.000147  | -0.000188 | 1.416663  |
| H  | 1.166719  | 5.281265  | 0.350657  |
| H  | -0.384087 | 4.995227  | -0.446472 |
| H  | -1.169097 | -5.279875 | 0.351682  |

73

(1*S*,2*S*,4*R*,7*S*,8*S*,10*R*)-(δδδδ)-[7·Na]<sup>+</sup> E(gas)=-1472.59507243 E(Toluene)=-1472.63315873

|   |           |           |           |
|---|-----------|-----------|-----------|
| C | -2.219567 | 0.897904  | -0.714412 |
| H | -3.243731 | 1.095513  | -1.084489 |
| H | -1.636198 | 0.616058  | -1.603596 |
| C | -1.669836 | 2.184485  | -0.100169 |
| C | -1.893701 | 3.484147  | -0.906132 |
| H | -2.175462 | 2.322936  | 0.873696  |
| C | -3.361456 | -0.199337 | 1.199531  |
| H | -3.269624 | 0.732798  | 1.780083  |
| C | -4.759202 | -0.275956 | 0.608286  |
| H | -3.209963 | -1.030555 | 1.906791  |
| C | -5.372732 | -1.513854 | 0.346327  |
| C | -6.651833 | -1.575946 | -0.214755 |
| C | -7.343719 | -0.397720 | -0.517016 |
| C | -6.755552 | 0.841321  | -0.243699 |
| C | -5.475666 | 0.898575  | 0.317736  |
| H | -4.855971 | -2.442434 | 0.603885  |
| H | -7.116100 | -2.546124 | -0.403439 |
| H | -8.345424 | -0.445832 | -0.948361 |
| H | -7.299188 | 1.764207  | -0.456095 |
| H | -5.037529 | 1.871868  | 0.558032  |
| C | 0.695264  | 1.907773  | -0.904573 |
| H | 0.755418  | 2.770884  | -1.594689 |
| H | 0.278232  | 1.078104  | -1.493894 |
| C | 2.121578  | 1.549138  | -0.462027 |
| H | 2.789853  | 1.589759  | -1.344250 |
| H | 2.482657  | 2.323519  | 0.231367  |
| C | -0.031690 | 3.594743  | 0.699525  |
| H | 1.031266  | 3.869734  | 0.714505  |
| H | -0.405190 | 3.677546  | 1.731941  |
| H | -2.934590 | 3.829945  | -0.839958 |
| H | -1.674951 | 3.321698  | -1.973268 |
| C | 2.219722  | -0.896961 | -0.714596 |
| H | 3.244157  | -1.094626 | -1.083914 |
| H | 1.636976  | -0.615102 | -1.604183 |
| C | 1.669880  | -2.183657 | -0.100606 |
| C | 1.893941  | -3.483063 | -0.906895 |
| H | 2.175546  | -2.322235 | 0.873222  |
| C | 3.361165  | 0.200121  | 1.199573  |
| C | 4.759119  | 0.275584  | 0.608485  |
| H | 3.268820  | -0.731803 | 1.780393  |
| H | 3.210020  | 1.031599  | 1.906601  |
| C | 5.372517  | 1.512860  | 0.343273  |

|    |           |           |           |
|----|-----------|-----------|-----------|
| C  | 6.651655  | 1.573571  | -0.217865 |
| C  | 7.343704  | 0.394617  | -0.516922 |
| C  | 6.755666  | -0.843754 | -0.240346 |
| C  | 5.475720  | -0.899632 | 0.321094  |
| H  | 4.855712  | 2.442084  | 0.598357  |
| H  | 7.115835  | 2.543288  | -0.409120 |
| H  | 8.345437  | 0.441704  | -0.948316 |
| H  | 7.299408  | -1.767147 | -0.450250 |
| H  | 5.037545  | -1.872320 | 0.563823  |
| C  | -0.695199 | -1.906235 | -0.904683 |
| H  | -0.754959 | -2.768537 | -1.595854 |
| H  | -0.278324 | -1.075793 | -1.493047 |
| C  | -2.121603 | -1.548132 | -0.461988 |
| H  | -2.789945 | -1.588798 | -1.344158 |
| H  | -2.482507 | -2.322632 | 0.231365  |
| C  | 0.031617  | -3.594340 | 0.698303  |
| H  | 2.934692  | -3.829102 | -0.840019 |
| C  | -0.886651 | 4.476901  | -0.263643 |
| C  | 0.886341  | -4.475946 | -0.265550 |
| H  | -1.031362 | -3.869216 | 0.713203  |
| H  | 0.405285  | -3.677822 | 1.730600  |
| H  | 0.263002  | -4.963430 | -1.027741 |
| H  | 1.393148  | -5.277111 | 0.289430  |
| H  | -1.393975 | 5.277190  | 0.292086  |
| H  | -0.263411 | 4.965525  | -1.025229 |
| H  | 1.676100  | -3.320206 | -1.974155 |
| N  | -2.208625 | -0.244375 | 0.238463  |
| N  | -0.204994 | 2.180442  | 0.251546  |
| N  | 2.208489  | 0.245327  | 0.238342  |
| N  | 0.205054  | -2.179770 | 0.251171  |
| Na | 0.000266  | 0.000024  | 1.380408  |

73

(1R,2S,4S,7R,8S,10S)-(λλλλ)-[7·Na]<sup>+</sup> E(gas)=-1472.59793642 E(Toluene)=-1472.63540379

|   |          |           |           |
|---|----------|-----------|-----------|
| C | 2.240140 | 0.986569  | -0.827324 |
| H | 3.256080 | 1.253126  | -1.174196 |
| H | 1.709452 | 0.653657  | -1.732463 |
| C | 1.559741 | 2.280903  | -0.335528 |
| H | 1.635981 | 2.985715  | -1.195254 |
| C | 2.149075 | 2.981718  | 0.895487  |
| C | 3.518855 | -0.163833 | 0.986525  |
| H | 3.489907 | 0.747885  | 1.597788  |
| C | 4.867613 | -0.245801 | 0.289622  |
| H | 3.408186 | -1.015441 | 1.676869  |
| C | 5.448968 | -1.484936 | -0.033889 |
| C | 6.686634 | -1.550978 | -0.680996 |
| C | 7.370351 | -0.375388 | -1.010526 |
| C | 6.816753 | 0.864624  | -0.676611 |
| C | 5.578450 | 0.925390  | -0.028722 |



|   |           |           |           |
|---|-----------|-----------|-----------|
| H | 4.941608  | -2.412857 | 0.243633  |
| H | 7.125519  | -2.522791 | -0.916320 |
| H | 8.339729  | -0.426851 | -1.509993 |
| H | 7.355545  | 1.785526  | -0.908975 |
| H | 5.170933  | 1.898722  | 0.258651  |
| C | -0.782771 | 1.843436  | -1.069783 |
| H | -0.869411 | 2.730982  | -1.733891 |
| H | -0.347983 | 1.039780  | -1.684712 |
| C | -2.199544 | 1.454860  | -0.628246 |
| H | -2.854565 | 1.457279  | -1.520838 |
| H | -2.585939 | 2.243154  | 0.034481  |
| C | -0.252968 | 3.374133  | 0.786874  |
| H | -0.924193 | 3.136439  | 1.627065  |
| C | 1.073255  | 4.020260  | 1.255804  |
| H | 2.270164  | 2.263272  | 1.721034  |
| H | 3.131129  | 3.431027  | 0.693894  |
| C | -2.240128 | -0.986478 | -0.827346 |
| H | -3.256090 | -1.252998 | -1.174166 |
| H | -1.709452 | -0.653541 | -1.732478 |
| C | -1.559742 | -2.280828 | -0.335588 |
| H | -1.635986 | -2.985617 | -1.195336 |
| C | -2.149102 | -2.981667 | 0.895377  |
| C | -3.518828 | 0.163954  | 0.986497  |
| C | -4.867618 | 0.245786  | 0.289613  |
| H | -3.489831 | -0.747710 | 1.597846  |
| H | -3.408239 | 1.015606  | 1.676805  |
| C | -5.448982 | 1.484873  | -0.034101 |
| C | -6.686664 | 1.550804  | -0.681180 |
| C | -7.370405 | 0.375155  | -1.010463 |
| C | -6.816809 | -0.864794 | -0.676333 |
| C | -5.578475 | -0.925450 | -0.028485 |
| H | -4.941622 | 2.412840  | 0.243255  |
| H | -7.125552 | 2.522574  | -0.916675 |
| H | -8.339802 | 0.426532  | -1.509902 |
| H | -7.355620 | -1.785735 | -0.908501 |
| H | -5.170929 | -1.898731 | 0.259019  |
| C | 0.782825  | -1.843391 | -1.069777 |
| H | 0.869519  | -2.730957 | -1.733850 |
| H | 0.348034  | -1.039767 | -1.684744 |
| C | 2.199563  | -1.454778 | -0.628168 |
| H | 2.854653  | -1.457280 | -1.520710 |
| H | 2.585907  | -2.243027 | 0.034647  |
| C | 0.252948  | -3.373899 | 0.787076  |
| H | -3.131211 | -3.430874 | 0.693813  |
| H | 0.923758  | -3.136009 | 1.627553  |
| C | -1.073329 | -4.020320 | 1.255510  |
| H | -2.270073 | -2.263298 | 1.721011  |
| H | -1.250642 | -4.957611 | 0.709126  |

|    |           |           |          |
|----|-----------|-----------|----------|
| H  | -1.066252 | -4.266165 | 2.325621 |
| H  | -0.804821 | 4.058279  | 0.114550 |
| N  | 2.289251  | -0.166688 | 0.113877 |
| N  | 0.126330  | 2.122007  | 0.055514 |
| N  | -2.289221 | 0.166822  | 0.113887 |
| N  | -0.126353 | -2.121944 | 0.055471 |
| Na | 0.000114  | -0.000132 | 1.209289 |
| H  | 0.805280  | -4.058011 | 0.115095 |
| H  | 1.065987  | 4.265612  | 2.326024 |
| H  | 1.250702  | 4.957799  | 0.709886 |

136

(S,S,S)-(δλδλδλ)-[4Na]<sup>+</sup> E(gas)=-2706.76999929

|   |           |           |           |
|---|-----------|-----------|-----------|
| N | 1.352274  | -2.480068 | 0.439012  |
| N | -1.565314 | -2.576349 | -0.549581 |
| N | -2.864728 | 0.091460  | 0.408053  |
| N | -1.427410 | 2.648168  | -0.590166 |
| N | 1.530689  | 2.422440  | 0.369759  |
| N | 3.068739  | -0.093081 | -0.591967 |
| C | -1.378686 | 2.917857  | -2.080549 |
| C | -2.117865 | 4.179472  | -2.532873 |
| C | -1.748195 | 1.695709  | -2.932967 |
| H | -0.311435 | 3.100415  | -2.275872 |
| C | -2.790242 | 2.595564  | -0.007858 |
| H | -3.437366 | 3.404344  | -0.400276 |
| H | -2.681618 | 2.812893  | 1.065226  |
| C | -0.660372 | 3.681682  | 0.153587  |
| H | -0.878091 | 3.530861  | 1.221459  |
| H | -1.019421 | 4.704616  | -0.082906 |
| C | 0.849543  | 3.666285  | -0.049250 |
| H | 1.088354  | 3.817675  | -1.112767 |
| H | 1.262193  | 4.552744  | 0.475978  |
| C | 1.525915  | 2.244270  | 1.855522  |
| C | 2.187357  | 3.325212  | 2.700353  |
| H | 1.999315  | 1.272279  | 2.066218  |
| H | 0.472535  | 2.150017  | 2.166093  |
| C | 2.893190  | 2.433618  | -0.206659 |
| H | 3.510970  | 3.244819  | 0.235061  |
| H | 2.778842  | 2.685452  | -1.269307 |
| C | 3.690999  | 1.139625  | -0.057947 |
| H | 4.695785  | 1.315032  | -0.490031 |
| H | 3.872121  | 0.965707  | 1.012942  |
| C | 3.560567  | -1.245797 | 0.201247  |
| H | 3.535900  | -0.938858 | 1.257351  |
| H | 4.624484  | -1.475377 | -0.018069 |
| C | 3.275429  | -0.324634 | -2.071548 |
| C | 4.739818  | -0.395984 | -2.514554 |
| C | 2.448060  | 0.627007  | -2.946279 |
| H | 2.857507  | -1.328845 | -2.241538 |

|    |           |           |           |
|----|-----------|-----------|-----------|
| Na | -0.115106 | -0.014545 | -0.174065 |
| C  | 1.168252  | -2.273465 | 1.908467  |
| C  | 1.756777  | -3.306331 | 2.860236  |
| H  | 1.595733  | -1.286704 | 2.150186  |
| H  | 0.083469  | -2.196820 | 2.086817  |
| C  | 2.776676  | -2.544595 | 0.048357  |
| H  | 3.319520  | -3.324445 | 0.622539  |
| H  | 2.802679  | -2.878802 | -0.999853 |
| C  | 0.685258  | -3.701430 | -0.059558 |
| H  | 0.981717  | -3.813981 | -1.110743 |
| H  | 1.058115  | -4.609425 | 0.460951  |
| C  | -0.836515 | -3.713491 | 0.062856  |
| H  | -1.098185 | -3.712969 | 1.131634  |
| H  | -1.198690 | -4.687711 | -0.319564 |
| C  | -1.792790 | -2.693291 | -2.044001 |
| C  | -2.529733 | -3.958778 | -2.488240 |
| H  | -2.467183 | -1.853486 | -2.270852 |
| C  | -0.524362 | -2.440838 | -2.870435 |
| C  | -2.861872 | -2.432443 | 0.164504  |
| H  | -3.563663 | -3.251594 | -0.094740 |
| H  | -2.651168 | -2.550991 | 1.237509  |
| C  | -3.591511 | -1.113140 | -0.052054 |
| H  | -4.585249 | -1.197358 | 0.434033  |
| H  | -3.798208 | -0.969196 | -1.123256 |
| C  | -3.544304 | 1.278567  | -0.159924 |
| H  | -3.716845 | 1.063259  | -1.222374 |
| H  | -4.549927 | 1.421013  | 0.288841  |
| C  | -2.748675 | 0.151292  | 1.902368  |
| C  | -4.039202 | 0.173631  | 2.707973  |
| H  | -2.146500 | -0.716821 | 2.214362  |
| H  | -2.152779 | 1.045061  | 2.144325  |
| C  | 5.371791  | -1.648322 | -2.619378 |
| C  | 6.715077  | -1.758319 | -2.993380 |
| C  | 7.458587  | -0.607649 | -3.272647 |
| C  | 6.844598  | 0.646244  | -3.188296 |
| C  | 5.499528  | 0.749964  | -2.817319 |
| H  | 4.796716  | -2.558350 | -2.425164 |
| H  | 7.178376  | -2.744053 | -3.073719 |
| H  | 8.506500  | -0.687443 | -3.568477 |
| H  | 7.412553  | 1.549366  | -3.422251 |
| H  | 5.040425  | 1.740851  | -2.787199 |
| H  | 2.411575  | 0.238507  | -3.974447 |
| H  | 1.416215  | 0.708361  | -2.571565 |
| H  | 2.866427  | 1.639962  | -3.002673 |
| C  | -1.410937 | 5.385997  | -2.683703 |
| C  | -2.056735 | 6.562818  | -3.077439 |
| C  | -3.431842 | 6.554574  | -3.330655 |
| C  | -4.149871 | 5.361459  | -3.198480 |

|   |           |           |           |
|---|-----------|-----------|-----------|
| C | -3.498353 | 4.187108  | -2.807171 |
| H | -0.330785 | 5.402283  | -2.511599 |
| H | -1.483107 | 7.484722  | -3.194310 |
| H | -3.939487 | 7.469724  | -3.641707 |
| H | -5.221131 | 5.341952  | -3.410125 |
| H | -4.078258 | 3.263937  | -2.737168 |
| H | -1.440896 | 1.875989  | -3.973499 |
| H | -1.229710 | 0.789666  | -2.582719 |
| H | -2.824196 | 1.482142  | -2.951628 |
| C | -3.922994 | -3.919602 | -2.678823 |
| C | -4.637256 | -5.057989 | -3.066536 |
| C | -3.966238 | -6.267191 | -3.272409 |
| C | -2.579124 | -6.323231 | -3.100725 |
| C | -1.869208 | -5.180333 | -2.717400 |
| H | -4.458286 | -2.975345 | -2.542272 |
| H | -5.717489 | -4.997805 | -3.215379 |
| H | -4.518414 | -7.158005 | -3.578197 |
| H | -2.044132 | -7.259050 | -3.276122 |
| H | -0.783123 | -5.247363 | -2.620554 |
| H | -0.806337 | -2.255312 | -3.917181 |
| H | 0.024842  | -1.559635 | -2.504591 |
| H | 0.171380  | -3.289505 | -2.873587 |
| C | -4.680268 | 1.386561  | 3.017761  |
| C | -5.875600 | 1.405324  | 3.743671  |
| C | -6.449759 | 0.206640  | 4.180126  |
| C | -5.816148 | -1.007615 | 3.896016  |
| C | -4.621641 | -1.020635 | 3.168608  |
| H | -4.231196 | 2.333784  | 2.706660  |
| H | -6.353996 | 2.358628  | 3.978217  |
| H | -7.379932 | 0.219781  | 4.751598  |
| H | -6.247718 | -1.946469 | 4.249595  |
| H | -4.125659 | -1.975877 | 2.974569  |
| C | 1.025173  | -4.446436 | 3.238466  |
| C | 1.572947  | -5.402183 | 4.100224  |
| C | 2.866054  | -5.231409 | 4.605701  |
| C | 3.602077  | -4.095663 | 4.252202  |
| C | 3.049755  | -3.144143 | 3.388754  |
| H | 0.003483  | -4.583198 | 2.873807  |
| H | 0.984937  | -6.277213 | 4.385483  |
| H | 3.293449  | -5.974450 | 5.281856  |
| H | 4.605736  | -3.945882 | 4.655845  |
| H | 3.629431  | -2.251080 | 3.138802  |
| C | 3.559853  | 3.278560  | 3.003753  |
| C | 4.163685  | 4.281310  | 3.769461  |
| C | 3.401541  | 5.350744  | 4.251370  |
| C | 2.032048  | 5.405111  | 3.971983  |
| C | 1.433875  | 4.399891  | 3.205345  |
| H | 4.165592  | 2.437429  | 2.656258  |

|   |          |          |          |
|---|----------|----------|----------|
| H | 5.229899 | 4.222259 | 3.998398 |
| H | 3.870569 | 6.131863 | 4.852892 |
| H | 1.426404 | 6.227252 | 4.359245 |
| H | 0.358043 | 4.443808 | 3.013332 |

109

(1R,2S,4R,7R,8S,10R,13R,14S,16R)-(δλδλδλ)-[8·Na]<sup>+</sup> E(gas)=-2127.80417872

|    |           |           |           |
|----|-----------|-----------|-----------|
| N  | 2.182027  | 1.934402  | -1.385291 |
| N  | 2.731440  | -0.959951 | -0.520489 |
| N  | 0.577483  | -2.871582 | -1.363097 |
| N  | -2.199306 | -1.892046 | -0.513960 |
| N  | -2.758770 | 0.923280  | -1.392086 |
| N  | -0.540459 | 2.848085  | -0.508267 |
| C  | 2.337763  | 2.078409  | -2.860634 |
| C  | 3.067262  | 3.427761  | -3.115853 |
| H  | 1.334552  | 2.094483  | -3.314638 |
| H  | 2.864999  | 1.212073  | -3.281929 |
| C  | 1.921111  | 3.332983  | -0.939239 |
| C  | 2.828554  | 4.246478  | -1.818682 |
| H  | 2.194807  | 3.406543  | 0.123464  |
| C  | 3.436604  | 1.459350  | -0.753703 |
| H  | 3.343794  | 1.643890  | 0.327769  |
| H  | 4.320941  | 2.041206  | -1.088098 |
| C  | 3.752374  | -0.009126 | -1.006005 |
| H  | 3.856807  | -0.176099 | -2.089549 |
| H  | 4.752245  | -0.220612 | -0.573007 |
| C  | 2.654488  | -1.006821 | 0.973457  |
| C  | 3.910037  | -1.422915 | 1.727790  |
| H  | 1.827765  | -1.687405 | 1.231074  |
| H  | 2.349864  | -0.004112 | 1.313327  |
| C  | 3.007449  | -2.277101 | -1.123172 |
| H  | 3.964211  | -2.705311 | -0.756562 |
| H  | 3.146109  | -2.110337 | -2.204291 |
| C  | 1.924332  | -3.339684 | -0.923088 |
| C  | 2.255431  | -4.594991 | -1.787136 |
| H  | 1.862138  | -3.597460 | 0.144732  |
| C  | -0.453580 | -3.708562 | -0.700497 |
| H  | -0.241160 | -3.684108 | 0.379735  |
| H  | -0.382241 | -4.773996 | -1.002649 |
| C  | 0.606910  | -3.108783 | -2.834281 |
| C  | 1.391159  | -4.429555 | -3.067516 |
| H  | 1.128850  | -2.264138 | -3.311331 |
| H  | -0.411731 | -3.125650 | -3.244037 |
| Na | 0.015415  | -0.031418 | -1.022714 |
| C  | -2.219088 | -1.763465 | 0.976725  |
| C  | -3.208613 | -2.630207 | 1.742272  |
| H  | -1.200639 | -1.987964 | 1.332682  |
| H  | -2.404269 | -0.702009 | 1.205237  |
| C  | -1.886463 | -3.264240 | -0.960775 |

|   |           |           |           |
|---|-----------|-----------|-----------|
| H | -2.565160 | -4.012501 | -0.501584 |
| H | -2.087493 | -3.304167 | -2.042865 |
| C | -3.463539 | -1.477640 | -1.149604 |
| H | -3.362976 | -1.694158 | -2.226349 |
| H | -4.321378 | -2.089496 | -0.798000 |
| C | -3.848042 | -0.007041 | -0.978013 |
| H | -4.077314 | 0.189537  | 0.079356  |
| C | -5.075281 | 0.323116  | -1.886257 |
| C | -2.936719 | 1.012041  | -2.868468 |
| C | -4.464877 | 1.001730  | -3.142583 |
| H | -2.426497 | 1.898117  | -3.268981 |
| H | -2.458945 | 0.132646  | -3.329559 |
| C | -2.982533 | 2.234973  | -0.737222 |
| H | -3.935488 | 2.708399  | -1.054936 |
| H | -3.091655 | 2.040715  | 0.341119  |
| C | -1.879926 | 3.257667  | -0.974437 |
| H | -2.201688 | 4.216319  | -0.516969 |
| H | -1.797355 | 3.456592  | -2.054392 |
| C | 0.457166  | 3.744148  | -1.119050 |
| H | 0.230223  | 3.784094  | -2.197359 |
| H | 0.357953  | 4.786690  | -0.749018 |
| C | -0.440499 | 2.787576  | 0.982400  |
| C | -0.702938 | 4.073768  | 1.752913  |
| H | -1.148438 | 2.014733  | 1.322736  |
| H | 0.568182  | 2.414652  | 1.218747  |
| H | -4.850187 | 2.023772  | -3.264665 |
| H | -4.701746 | 0.461388  | -4.069383 |
| H | -5.773401 | 0.996875  | -1.370695 |
| H | -5.641622 | -0.586184 | -2.136239 |
| H | 0.706330  | -5.279912 | -3.193530 |
| H | 1.999782  | -4.375283 | -3.980576 |
| H | 1.996088  | -5.518331 | -1.251097 |
| H | 3.330437  | -4.652217 | -2.012332 |
| H | 4.140294  | 3.271768  | -3.294136 |
| H | 2.669465  | 3.931142  | -4.007816 |
| H | 3.776386  | 4.464373  | -1.307134 |
| H | 2.348039  | 5.215577  | -2.017189 |
| C | 0.331528  | 4.989960  | 2.013419  |
| C | 0.082923  | 6.184775  | 2.696676  |
| C | -1.210020 | 6.483023  | 3.139580  |
| C | -2.247229 | 5.574214  | 2.906437  |
| C | -1.992589 | 4.381511  | 2.221337  |
| H | 1.352800  | 4.759696  | 1.698353  |
| H | 0.902368  | 6.879464  | 2.892909  |
| H | -1.405434 | 7.413086  | 3.676887  |
| H | -3.255317 | 5.789769  | 3.266885  |
| H | -2.808485 | 3.669321  | 2.068281  |
| C | -2.828179 | -3.890781 | 2.236224  |

|   |           |           |          |
|---|-----------|-----------|----------|
| C | -3.735798 | -4.701389 | 2.925461 |
| C | -5.046866 | -4.261736 | 3.137635 |
| C | -5.437999 | -3.003935 | 2.667252 |
| C | -4.525424 | -2.197523 | 1.979718 |
| H | -1.799756 | -4.238148 | 2.101432 |
| H | -3.416136 | -5.673993 | 3.305598 |
| H | -5.756260 | -4.890631 | 3.679017 |
| H | -6.453697 | -2.644479 | 2.845575 |
| H | -4.841280 | -1.206842 | 1.641936 |
| C | 4.172296  | -2.774425 | 2.013862 |
| C | 5.333515  | -3.156610 | 2.693026 |
| C | 6.255603  | -2.188575 | 3.104723 |
| C | 6.002934  | -0.837980 | 2.843365 |
| C | 4.840014  | -0.461929 | 2.163206 |
| H | 3.449545  | -3.541222 | 1.722165 |
| H | 5.513880  | -4.211425 | 2.910773 |
| H | 7.160492  | -2.484587 | 3.638986 |
| H | 6.708461  | -0.074455 | 3.177826 |
| H | 4.643946  | 0.599775  | 1.988893 |
